# Supplementary material for: The role of gender and academic degree on preference for smooth curvature of abstract shapes
Source: PeerJ. 2021 Mar 9;9:e10877. doi: 10.7717/peerj.10877 (PMC7953868; doi:10.7717/peerj.10877)
Supplement: Supplemental Information 2 [file peerj-09-10877-s002.xlsx]

## Sheet: ALL=ExpRaw+Means&AQ
SubjectN	TrialNumber	stimID	form	form_01	nconcave	nvertices	RT	ratingShape	age	handedness	sex	sex_01	degree	degree_01	AQ(total scores)	AQ_C	SS	AS	AD	C	I	AQ(means)	SS	AS	AD	C	I	Rating_Angles	Rating_Curves	RatingDiff
1	1	22	angular	0	6	20	1.265	42	18	R	F	1	Psyc	1	11	-7.6125	1	3	6	1	0	0.22	0.0909091	0.272727	0.6	0.1	0	40.4028	58.5833	18.1806
1	2	127	angular	0	3	10	1.604	52	18	R	F	1	Psyc	1	11	-7.6125	1	3	6	1	0	0.22	0.0909091	0.272727	0.6	0.1	0	40.4028	58.5833	18.1806
1	3	56	angular	0	4	10	0.882	41	18	R	F	1	Psyc	1	11	-7.6125	1	3	6	1	0	0.22	0.0909091	0.272727	0.6	0.1	0	40.4028	58.5833	18.1806
1	4	101	curved	1	4	10	1.585	25	18	R	F	1	Psyc	1	11	-7.6125	1	3	6	1	0	0.22	0.0909091	0.272727	0.6	0.1	0	40.4028	58.5833	18.1806
1	5	61	angular	0	9	30	1.385	59	18	R	F	1	Psyc	1	11	-7.6125	1	3	6	1	0	0.22	0.0909091	0.272727	0.6	0.1	0	40.4028	58.5833	18.1806
1	6	117	angular	0	15	30	1.186	64	18	R	F	1	Psyc	1	11	-7.6125	1	3	6	1	0	0.22	0.0909091	0.272727	0.6	0.1	0	40.4028	58.5833	18.1806
1	7	68	curved	1	8	20	1.002	70	18	R	F	1	Psyc	1	11	-7.6125	1	3	6	1	0	0.22	0.0909091	0.272727	0.6	0.1	0	40.4028	58.5833	18.1806
1	8	128	angular	0	4	10	1.266	25	18	R	F	1	Psyc	1	11	-7.6125	1	3	6	1	0	0.22	0.0909091	0.272727	0.6	0.1	0	40.4028	58.5833	18.1806
1	9	60	angular	0	10	20	1.236	38	18	R	F	1	Psyc	1	11	-7.6125	1	3	6	1	0	0.22	0.0909091	0.272727	0.6	0.1	0	40.4028	58.5833	18.1806
1	10	77	angular	0	8	20	1.404	18	18	R	F	1	Psyc	1	11	-7.6125	1	3	6	1	0	0.22	0.0909091	0.272727	0.6	0.1	0	40.4028	58.5833	18.1806
1	11	122	curved	1	8	20	1.486	59	18	R	F	1	Psyc	1	11	-7.6125	1	3	6	1	0	0.22	0.0909091	0.272727	0.6	0.1	0	40.4028	58.5833	18.1806
1	12	82	curved	1	3	10	1.418	28	18	R	F	1	Psyc	1	11	-7.6125	1	3	6	1	0	0.22	0.0909091	0.272727	0.6	0.1	0	40.4028	58.5833	18.1806
1	13	44	angular	0	12	30	0.896	78	18	R	F	1	Psyc	1	11	-7.6125	1	3	6	1	0	0.22	0.0909091	0.272727	0.6	0.1	0	40.4028	58.5833	18.1806
1	14	34	curved	1	9	30	0.848	85	18	R	F	1	Psyc	1	11	-7.6125	1	3	6	1	0	0.22	0.0909091	0.272727	0.6	0.1	0	40.4028	58.5833	18.1806
1	15	97	angular	0	9	30	1.483	71	18	R	F	1	Psyc	1	11	-7.6125	1	3	6	1	0	0.22	0.0909091	0.272727	0.6	0.1	0	40.4028	58.5833	18.1806
1	16	73	angular	0	3	10	1.287	36	18	R	F	1	Psyc	1	11	-7.6125	1	3	6	1	0	0.22	0.0909091	0.272727	0.6	0.1	0	40.4028	58.5833	18.1806
1	17	28	curved	1	3	10	5.029	22	18	R	F	1	Psyc	1	11	-7.6125	1	3	6	1	0	0.22	0.0909091	0.272727	0.6	0.1	0	40.4028	58.5833	18.1806
1	18	75	angular	0	5	10	1.353	53	18	R	F	1	Psyc	1	11	-7.6125	1	3	6	1	0	0.22	0.0909091	0.272727	0.6	0.1	0	40.4028	58.5833	18.1806
1	19	40	angular	0	6	20	1.554	33	18	R	F	1	Psyc	1	11	-7.6125	1	3	6	1	0	0.22	0.0909091	0.272727	0.6	0.1	0	40.4028	58.5833	18.1806
1	20	8	angular	0	12	30	1.301	76	18	R	F	1	Psyc	1	11	-7.6125	1	3	6	1	0	0.22	0.0909091	0.272727	0.6	0.1	0	40.4028	58.5833	18.1806
1	21	24	angular	0	10	20	0.932	64	18	R	F	1	Psyc	1	11	-7.6125	1	3	6	1	0	0.22	0.0909091	0.272727	0.6	0.1	0	40.4028	58.5833	18.1806
1	22	78	angular	0	10	20	1.603	33	18	R	F	1	Psyc	1	11	-7.6125	1	3	6	1	0	0.22	0.0909091	0.272727	0.6	0.1	0	40.4028	58.5833	18.1806
1	23	137	curved	1	4	10	1.586	17	18	R	F	1	Psyc	1	11	-7.6125	1	3	6	1	0	0.22	0.0909091	0.272727	0.6	0.1	0	40.4028	58.5833	18.1806
1	24	125	curved	1	12	30	1.149	89	18	R	F	1	Psyc	1	11	-7.6125	1	3	6	1	0	0.22	0.0909091	0.272727	0.6	0.1	0	40.4028	58.5833	18.1806
1	25	4	angular	0	6	20	1.454	69	18	R	F	1	Psyc	1	11	-7.6125	1	3	6	1	0	0.22	0.0909091	0.272727	0.6	0.1	0	40.4028	58.5833	18.1806
1	26	29	curved	1	4	10	1.688	37	18	R	F	1	Psyc	1	11	-7.6125	1	3	6	1	0	0.22	0.0909091	0.272727	0.6	0.1	0	40.4028	58.5833	18.1806
1	27	16	curved	1	9	30	1.553	78	18	R	F	1	Psyc	1	11	-7.6125	1	3	6	1	0	0.22	0.0909091	0.272727	0.6	0.1	0	40.4028	58.5833	18.1806
1	28	81	angular	0	15	30	0.802	85	18	R	F	1	Psyc	1	11	-7.6125	1	3	6	1	0	0.22	0.0909091	0.272727	0.6	0.1	0	40.4028	58.5833	18.1806
1	29	138	curved	1	5	10	1.299	70	18	R	F	1	Psyc	1	11	-7.6125	1	3	6	1	0	0.22	0.0909091	0.272727	0.6	0.1	0	40.4028	58.5833	18.1806
1	30	71	curved	1	12	30	1.47	80	18	R	F	1	Psyc	1	11	-7.6125	1	3	6	1	0	0.22	0.0909091	0.272727	0.6	0.1	0	40.4028	58.5833	18.1806
1	31	62	angular	0	12	30	1.067	43	18	R	F	1	Psyc	1	11	-7.6125	1	3	6	1	0	0.22	0.0909091	0.272727	0.6	0.1	0	40.4028	58.5833	18.1806
1	32	84	curved	1	5	10	1.87	54	18	R	F	1	Psyc	1	11	-7.6125	1	3	6	1	0	0.22	0.0909091	0.272727	0.6	0.1	0	40.4028	58.5833	18.1806
1	33	52	curved	1	9	30	1.253	67	18	R	F	1	Psyc	1	11	-7.6125	1	3	6	1	0	0.22	0.0909091	0.272727	0.6	0.1	0	40.4028	58.5833	18.1806
1	34	76	angular	0	6	20	1.381	14	18	R	F	1	Psyc	1	11	-7.6125	1	3	6	1	0	0.22	0.0909091	0.272727	0.6	0.1	0	40.4028	58.5833	18.1806
1	35	27	angular	0	15	30	0.816	30	18	R	F	1	Psyc	1	11	-7.6125	1	3	6	1	0	0.22	0.0909091	0.272727	0.6	0.1	0	40.4028	58.5833	18.1806
1	36	142	curved	1	9	30	2.355	16	18	R	F	1	Psyc	1	11	-7.6125	1	3	6	1	0	0.22	0.0909091	0.272727	0.6	0.1	0	40.4028	58.5833	18.1806
1	37	86	curved	1	8	20	1.369	48	18	R	F	1	Psyc	1	11	-7.6125	1	3	6	1	0	0.22	0.0909091	0.272727	0.6	0.1	0	40.4028	58.5833	18.1806
1	38	23	angular	0	8	20	1.252	29	18	R	F	1	Psyc	1	11	-7.6125	1	3	6	1	0	0.22	0.0909091	0.272727	0.6	0.1	0	40.4028	58.5833	18.1806
1	39	139	curved	1	6	20	1.387	41	18	R	F	1	Psyc	1	11	-7.6125	1	3	6	1	0	0.22	0.0909091	0.272727	0.6	0.1	0	40.4028	58.5833	18.1806
1	40	35	curved	1	12	30	1.55	79	18	R	F	1	Psyc	1	11	-7.6125	1	3	6	1	0	0.22	0.0909091	0.272727	0.6	0.1	0	40.4028	58.5833	18.1806
1	41	12	curved	1	5	10	1.921	36	18	R	F	1	Psyc	1	11	-7.6125	1	3	6	1	0	0.22	0.0909091	0.272727	0.6	0.1	0	40.4028	58.5833	18.1806
1	42	113	angular	0	8	20	1.536	21	18	R	F	1	Psyc	1	11	-7.6125	1	3	6	1	0	0.22	0.0909091	0.272727	0.6	0.1	0	40.4028	58.5833	18.1806
1	43	120	curved	1	5	10	1.571	64	18	R	F	1	Psyc	1	11	-7.6125	1	3	6	1	0	0.22	0.0909091	0.272727	0.6	0.1	0	40.4028	58.5833	18.1806
1	44	72	curved	1	15	30	0.816	57	18	R	F	1	Psyc	1	11	-7.6125	1	3	6	1	0	0.22	0.0909091	0.272727	0.6	0.1	0	40.4028	58.5833	18.1806
1	45	99	angular	0	15	30	0.751	46	18	R	F	1	Psyc	1	11	-7.6125	1	3	6	1	0	0.22	0.0909091	0.272727	0.6	0.1	0	40.4028	58.5833	18.1806
1	46	107	curved	1	12	30	1.22	23	18	R	F	1	Psyc	1	11	-7.6125	1	3	6	1	0	0.22	0.0909091	0.272727	0.6	0.1	0	40.4028	58.5833	18.1806
1	47	131	angular	0	8	20	0.564	8	18	R	F	1	Psyc	1	11	-7.6125	1	3	6	1	0	0.22	0.0909091	0.272727	0.6	0.1	0	40.4028	58.5833	18.1806
1	48	45	angular	0	15	30	0.747	48	18	R	F	1	Psyc	1	11	-7.6125	1	3	6	1	0	0.22	0.0909091	0.272727	0.6	0.1	0	40.4028	58.5833	18.1806
1	49	106	curved	1	9	30	1.183	89	18	R	F	1	Psyc	1	11	-7.6125	1	3	6	1	0	0.22	0.0909091	0.272727	0.6	0.1	0	40.4028	58.5833	18.1806
1	50	30	curved	1	5	10	0.868	100	18	R	F	1	Psyc	1	11	-7.6125	1	3	6	1	0	0.22	0.0909091	0.272727	0.6	0.1	0	40.4028	58.5833	18.1806
1	51	18	curved	1	15	30	0.716	72	18	R	F	1	Psyc	1	11	-7.6125	1	3	6	1	0	0.22	0.0909091	0.272727	0.6	0.1	0	40.4028	58.5833	18.1806
1	52	100	curved	1	3	10	0.816	81	18	R	F	1	Psyc	1	11	-7.6125	1	3	6	1	0	0.22	0.0909091	0.272727	0.6	0.1	0	40.4028	58.5833	18.1806
1	53	36	curved	1	15	30	0.968	45	18	R	F	1	Psyc	1	11	-7.6125	1	3	6	1	0	0.22	0.0909091	0.272727	0.6	0.1	0	40.4028	58.5833	18.1806
1	54	85	curved	1	6	20	1.019	34	18	R	F	1	Psyc	1	11	-7.6125	1	3	6	1	0	0.22	0.0909091	0.272727	0.6	0.1	0	40.4028	58.5833	18.1806
1	55	132	angular	0	10	20	1.738	21	18	R	F	1	Psyc	1	11	-7.6125	1	3	6	1	0	0.22	0.0909091	0.272727	0.6	0.1	0	40.4028	58.5833	18.1806
1	56	39	angular	0	5	10	1.969	34	18	R	F	1	Psyc	1	11	-7.6125	1	3	6	1	0	0.22	0.0909091	0.272727	0.6	0.1	0	40.4028	58.5833	18.1806
1	57	119	curved	1	4	10	1.619	61	18	R	F	1	Psyc	1	11	-7.6125	1	3	6	1	0	0.22	0.0909091	0.272727	0.6	0.1	0	40.4028	58.5833	18.1806
1	58	59	angular	0	8	20	1.417	36	18	R	F	1	Psyc	1	11	-7.6125	1	3	6	1	0	0.22	0.0909091	0.272727	0.6	0.1	0	40.4028	58.5833	18.1806
1	59	90	curved	1	15	30	1.487	60	18	R	F	1	Psyc	1	11	-7.6125	1	3	6	1	0	0.22	0.0909091	0.272727	0.6	0.1	0	40.4028	58.5833	18.1806
1	60	53	curved	1	12	30	1.385	68	18	R	F	1	Psyc	1	11	-7.6125	1	3	6	1	0	0.22	0.0909091	0.272727	0.6	0.1	0	40.4028	58.5833	18.1806
1	61	98	angular	0	12	30	1.903	77	18	R	F	1	Psyc	1	11	-7.6125	1	3	6	1	0	0.22	0.0909091	0.272727	0.6	0.1	0	40.4028	58.5833	18.1806
1	62	46	curved	1	3	10	1.418	25	18	R	F	1	Psyc	1	11	-7.6125	1	3	6	1	0	0.22	0.0909091	0.272727	0.6	0.1	0	40.4028	58.5833	18.1806
1	63	108	curved	1	15	30	1.282	79	18	R	F	1	Psyc	1	11	-7.6125	1	3	6	1	0	0.22	0.0909091	0.272727	0.6	0.1	0	40.4028	58.5833	18.1806
1	64	91	angular	0	3	10	0.999	29	18	R	F	1	Psyc	1	11	-7.6125	1	3	6	1	0	0.22	0.0909091	0.272727	0.6	0.1	0	40.4028	58.5833	18.1806
1	65	19	angular	0	3	10	2.204	12	18	R	F	1	Psyc	1	11	-7.6125	1	3	6	1	0	0.22	0.0909091	0.272727	0.6	0.1	0	40.4028	58.5833	18.1806
1	66	69	curved	1	10	20	1.299	56	18	R	F	1	Psyc	1	11	-7.6125	1	3	6	1	0	0.22	0.0909091	0.272727	0.6	0.1	0	40.4028	58.5833	18.1806
1	67	144	curved	1	15	30	0.716	64	18	R	F	1	Psyc	1	11	-7.6125	1	3	6	1	0	0.22	0.0909091	0.272727	0.6	0.1	0	40.4028	58.5833	18.1806
1	68	70	curved	1	9	30	1.186	45	18	R	F	1	Psyc	1	11	-7.6125	1	3	6	1	0	0.22	0.0909091	0.272727	0.6	0.1	0	40.4028	58.5833	18.1806
1	69	57	angular	0	5	10	1.27	23	18	R	F	1	Psyc	1	11	-7.6125	1	3	6	1	0	0.22	0.0909091	0.272727	0.6	0.1	0	40.4028	58.5833	18.1806
1	70	41	angular	0	8	20	1.37	70	18	R	F	1	Psyc	1	11	-7.6125	1	3	6	1	0	0.22	0.0909091	0.272727	0.6	0.1	0	40.4028	58.5833	18.1806
1	71	135	angular	0	15	30	1.303	64	18	R	F	1	Psyc	1	11	-7.6125	1	3	6	1	0	0.22	0.0909091	0.272727	0.6	0.1	0	40.4028	58.5833	18.1806
1	72	114	angular	0	10	20	1.219	32	18	R	F	1	Psyc	1	11	-7.6125	1	3	6	1	0	0.22	0.0909091	0.272727	0.6	0.1	0	40.4028	58.5833	18.1806
1	73	124	curved	1	9	30	1.135	49	18	R	F	1	Psyc	1	11	-7.6125	1	3	6	1	0	0.22	0.0909091	0.272727	0.6	0.1	0	40.4028	58.5833	18.1806
1	74	109	angular	0	3	10	0.918	15	18	R	F	1	Psyc	1	11	-7.6125	1	3	6	1	0	0.22	0.0909091	0.272727	0.6	0.1	0	40.4028	58.5833	18.1806
1	75	88	curved	1	9	30	1.316	69	18	R	F	1	Psyc	1	11	-7.6125	1	3	6	1	0	0.22	0.0909091	0.272727	0.6	0.1	0	40.4028	58.5833	18.1806
1	76	2	angular	0	4	10	0.933	36	18	R	F	1	Psyc	1	11	-7.6125	1	3	6	1	0	0.22	0.0909091	0.272727	0.6	0.1	0	40.4028	58.5833	18.1806
1	77	143	curved	1	12	30	1.333	59	18	R	F	1	Psyc	1	11	-7.6125	1	3	6	1	0	0.22	0.0909091	0.272727	0.6	0.1	0	40.4028	58.5833	18.1806
1	78	136	curved	1	3	10	1.604	48	18	R	F	1	Psyc	1	11	-7.6125	1	3	6	1	0	0.22	0.0909091	0.272727	0.6	0.1	0	40.4028	58.5833	18.1806
1	79	104	curved	1	8	20	1.367	43	18	R	F	1	Psyc	1	11	-7.6125	1	3	6	1	0	0.22	0.0909091	0.272727	0.6	0.1	0	40.4028	58.5833	18.1806
1	80	64	curved	1	3	10	1.169	77	18	R	F	1	Psyc	1	11	-7.6125	1	3	6	1	0	0.22	0.0909091	0.272727	0.6	0.1	0	40.4028	58.5833	18.1806
1	81	83	curved	1	4	10	9.057	22	18	R	F	1	Psyc	1	11	-7.6125	1	3	6	1	0	0.22	0.0909091	0.272727	0.6	0.1	0	40.4028	58.5833	18.1806
1	82	112	angular	0	6	20	1.52	30	18	R	F	1	Psyc	1	11	-7.6125	1	3	6	1	0	0.22	0.0909091	0.272727	0.6	0.1	0	40.4028	58.5833	18.1806
1	83	102	curved	1	5	10	7.154	54	18	R	F	1	Psyc	1	11	-7.6125	1	3	6	1	0	0.22	0.0909091	0.272727	0.6	0.1	0	40.4028	58.5833	18.1806
1	84	58	angular	0	6	20	1.168	72	18	R	F	1	Psyc	1	11	-7.6125	1	3	6	1	0	0.22	0.0909091	0.272727	0.6	0.1	0	40.4028	58.5833	18.1806
1	85	80	angular	0	12	30	2.088	77	18	R	F	1	Psyc	1	11	-7.6125	1	3	6	1	0	0.22	0.0909091	0.272727	0.6	0.1	0	40.4028	58.5833	18.1806
1	86	123	curved	1	10	20	1.52	29	18	R	F	1	Psyc	1	11	-7.6125	1	3	6	1	0	0.22	0.0909091	0.272727	0.6	0.1	0	40.4028	58.5833	18.1806
1	87	25	angular	0	9	30	1.019	35	18	R	F	1	Psyc	1	11	-7.6125	1	3	6	1	0	0.22	0.0909091	0.272727	0.6	0.1	0	40.4028	58.5833	18.1806
1	88	141	curved	1	10	20	1.751	85	18	R	F	1	Psyc	1	11	-7.6125	1	3	6	1	0	0.22	0.0909091	0.272727	0.6	0.1	0	40.4028	58.5833	18.1806
1	89	79	angular	0	9	30	2.422	71	18	R	F	1	Psyc	1	11	-7.6125	1	3	6	1	0	0.22	0.0909091	0.272727	0.6	0.1	0	40.4028	58.5833	18.1806
1	90	134	angular	0	12	30	1.034	35	18	R	F	1	Psyc	1	11	-7.6125	1	3	6	1	0	0.22	0.0909091	0.272727	0.6	0.1	0	40.4028	58.5833	18.1806
1	91	48	curved	1	5	10	1.432	91	18	R	F	1	Psyc	1	11	-7.6125	1	3	6	1	0	0.22	0.0909091	0.272727	0.6	0.1	0	40.4028	58.5833	18.1806
1	92	54	curved	1	15	30	1.136	69	18	R	F	1	Psyc	1	11	-7.6125	1	3	6	1	0	0.22	0.0909091	0.272727	0.6	0.1	0	40.4028	58.5833	18.1806
1	93	15	curved	1	10	20	1.034	26	18	R	F	1	Psyc	1	11	-7.6125	1	3	6	1	0	0.22	0.0909091	0.272727	0.6	0.1	0	40.4028	58.5833	18.1806
1	94	47	curved	1	4	10	0.867	62	18	R	F	1	Psyc	1	11	-7.6125	1	3	6	1	0	0.22	0.0909091	0.272727	0.6	0.1	0	40.4028	58.5833	18.1806
1	95	89	curved	1	12	30	1.235	50	18	R	F	1	Psyc	1	11	-7.6125	1	3	6	1	0	0.22	0.0909091	0.272727	0.6	0.1	0	40.4028	58.5833	18.1806
1	96	129	angular	0	5	10	0.801	70	18	R	F	1	Psyc	1	11	-7.6125	1	3	6	1	0	0.22	0.0909091	0.272727	0.6	0.1	0	40.4028	58.5833	18.1806
1	97	26	angular	0	12	30	0.935	32	18	R	F	1	Psyc	1	11	-7.6125	1	3	6	1	0	0.22	0.0909091	0.272727	0.6	0.1	0	40.4028	58.5833	18.1806
1	98	49	curved	1	6	20	1.048	41	18	R	F	1	Psyc	1	11	-7.6125	1	3	6	1	0	0.22	0.0909091	0.272727	0.6	0.1	0	40.4028	58.5833	18.1806
1	99	42	angular	0	10	20	0.868	24	18	R	F	1	Psyc	1	11	-7.6125	1	3	6	1	0	0.22	0.0909091	0.272727	0.6	0.1	0	40.4028	58.5833	18.1806
1	100	17	curved	1	12	30	2.522	84	18	R	F	1	Psyc	1	11	-7.6125	1	3	6	1	0	0.22	0.0909091	0.272727	0.6	0.1	0	40.4028	58.5833	18.1806
1	101	103	curved	1	6	20	1.604	59	18	R	F	1	Psyc	1	11	-7.6125	1	3	6	1	0	0.22	0.0909091	0.272727	0.6	0.1	0	40.4028	58.5833	18.1806
1	102	3	angular	0	5	10	0.917	37	18	R	F	1	Psyc	1	11	-7.6125	1	3	6	1	0	0.22	0.0909091	0.272727	0.6	0.1	0	40.4028	58.5833	18.1806
1	103	7	angular	0	9	30	1.37	46	18	R	F	1	Psyc	1	11	-7.6125	1	3	6	1	0	0.22	0.0909091	0.272727	0.6	0.1	0	40.4028	58.5833	18.1806
1	104	92	angular	0	4	10	0.732	54	18	R	F	1	Psyc	1	11	-7.6125	1	3	6	1	0	0.22	0.0909091	0.272727	0.6	0.1	0	40.4028	58.5833	18.1806
1	105	116	angular	0	12	30	0.951	29	18	R	F	1	Psyc	1	11	-7.6125	1	3	6	1	0	0.22	0.0909091	0.272727	0.6	0.1	0	40.4028	58.5833	18.1806
1	106	111	angular	0	5	10	3.34	38	18	R	F	1	Psyc	1	11	-7.6125	1	3	6	1	0	0.22	0.0909091	0.272727	0.6	0.1	0	40.4028	58.5833	18.1806
1	107	63	angular	0	15	30	1.721	62	18	R	F	1	Psyc	1	11	-7.6125	1	3	6	1	0	0.22	0.0909091	0.272727	0.6	0.1	0	40.4028	58.5833	18.1806
1	108	1	angular	0	3	10	0.996	16	18	R	F	1	Psyc	1	11	-7.6125	1	3	6	1	0	0.22	0.0909091	0.272727	0.6	0.1	0	40.4028	58.5833	18.1806
1	109	130	angular	0	6	20	0.865	25	18	R	F	1	Psyc	1	11	-7.6125	1	3	6	1	0	0.22	0.0909091	0.272727	0.6	0.1	0	40.4028	58.5833	18.1806
1	110	9	angular	0	15	30	1.352	36	18	R	F	1	Psyc	1	11	-7.6125	1	3	6	1	0	0.22	0.0909091	0.272727	0.6	0.1	0	40.4028	58.5833	18.1806
1	111	74	angular	0	4	10	0.864	10	18	R	F	1	Psyc	1	11	-7.6125	1	3	6	1	0	0.22	0.0909091	0.272727	0.6	0.1	0	40.4028	58.5833	18.1806
1	112	43	angular	0	9	30	1.554	50	18	R	F	1	Psyc	1	11	-7.6125	1	3	6	1	0	0.22	0.0909091	0.272727	0.6	0.1	0	40.4028	58.5833	18.1806
1	113	13	curved	1	6	20	1.052	27	18	R	F	1	Psyc	1	11	-7.6125	1	3	6	1	0	0.22	0.0909091	0.272727	0.6	0.1	0	40.4028	58.5833	18.1806
1	114	115	angular	0	9	30	1.485	51	18	R	F	1	Psyc	1	11	-7.6125	1	3	6	1	0	0.22	0.0909091	0.272727	0.6	0.1	0	40.4028	58.5833	18.1806
1	115	105	curved	1	10	20	0.918	30	18	R	F	1	Psyc	1	11	-7.6125	1	3	6	1	0	0.22	0.0909091	0.272727	0.6	0.1	0	40.4028	58.5833	18.1806
1	116	94	angular	0	6	20	0.968	22	18	R	F	1	Psyc	1	11	-7.6125	1	3	6	1	0	0.22	0.0909091	0.272727	0.6	0.1	0	40.4028	58.5833	18.1806
1	117	20	angular	0	4	10	1.034	59	18	R	F	1	Psyc	1	11	-7.6125	1	3	6	1	0	0.22	0.0909091	0.272727	0.6	0.1	0	40.4028	58.5833	18.1806
1	118	110	angular	0	4	10	0.864	24	18	R	F	1	Psyc	1	11	-7.6125	1	3	6	1	0	0.22	0.0909091	0.272727	0.6	0.1	0	40.4028	58.5833	18.1806
1	119	6	angular	0	10	20	1.233	43	18	R	F	1	Psyc	1	11	-7.6125	1	3	6	1	0	0.22	0.0909091	0.272727	0.6	0.1	0	40.4028	58.5833	18.1806
1	120	5	angular	0	8	20	1.153	14	18	R	F	1	Psyc	1	11	-7.6125	1	3	6	1	0	0.22	0.0909091	0.272727	0.6	0.1	0	40.4028	58.5833	18.1806
1	121	37	angular	0	3	10	1.303	29	18	R	F	1	Psyc	1	11	-7.6125	1	3	6	1	0	0.22	0.0909091	0.272727	0.6	0.1	0	40.4028	58.5833	18.1806
1	122	126	curved	1	15	30	1.098	79	18	R	F	1	Psyc	1	11	-7.6125	1	3	6	1	0	0.22	0.0909091	0.272727	0.6	0.1	0	40.4028	58.5833	18.1806
1	123	11	curved	1	4	10	1.236	32	18	R	F	1	Psyc	1	11	-7.6125	1	3	6	1	0	0.22	0.0909091	0.272727	0.6	0.1	0	40.4028	58.5833	18.1806
1	124	118	curved	1	3	10	0.751	61	18	R	F	1	Psyc	1	11	-7.6125	1	3	6	1	0	0.22	0.0909091	0.272727	0.6	0.1	0	40.4028	58.5833	18.1806
1	125	96	angular	0	10	20	1.353	12	18	R	F	1	Psyc	1	11	-7.6125	1	3	6	1	0	0.22	0.0909091	0.272727	0.6	0.1	0	40.4028	58.5833	18.1806
1	126	38	angular	0	4	10	1.319	36	18	R	F	1	Psyc	1	11	-7.6125	1	3	6	1	0	0.22	0.0909091	0.272727	0.6	0.1	0	40.4028	58.5833	18.1806
1	127	50	curved	1	8	20	0.915	74	18	R	F	1	Psyc	1	11	-7.6125	1	3	6	1	0	0.22	0.0909091	0.272727	0.6	0.1	0	40.4028	58.5833	18.1806
1	128	87	curved	1	10	20	0.782	88	18	R	F	1	Psyc	1	11	-7.6125	1	3	6	1	0	0.22	0.0909091	0.272727	0.6	0.1	0	40.4028	58.5833	18.1806
1	129	133	angular	0	9	30	1.236	34	18	R	F	1	Psyc	1	11	-7.6125	1	3	6	1	0	0.22	0.0909091	0.272727	0.6	0.1	0	40.4028	58.5833	18.1806
1	130	21	angular	0	5	10	0.798	55	18	R	F	1	Psyc	1	11	-7.6125	1	3	6	1	0	0.22	0.0909091	0.272727	0.6	0.1	0	40.4028	58.5833	18.1806
1	131	93	angular	0	5	10	0.53	31	18	R	F	1	Psyc	1	11	-7.6125	1	3	6	1	0	0.22	0.0909091	0.272727	0.6	0.1	0	40.4028	58.5833	18.1806
1	132	140	curved	1	8	20	1.416	65	18	R	F	1	Psyc	1	11	-7.6125	1	3	6	1	0	0.22	0.0909091	0.272727	0.6	0.1	0	40.4028	58.5833	18.1806
1	133	66	curved	1	5	10	0.968	93	18	R	F	1	Psyc	1	11	-7.6125	1	3	6	1	0	0.22	0.0909091	0.272727	0.6	0.1	0	40.4028	58.5833	18.1806
1	134	121	curved	1	6	20	0.65	83	18	R	F	1	Psyc	1	11	-7.6125	1	3	6	1	0	0.22	0.0909091	0.272727	0.6	0.1	0	40.4028	58.5833	18.1806
1	135	67	curved	1	6	20	2.022	91	18	R	F	1	Psyc	1	11	-7.6125	1	3	6	1	0	0.22	0.0909091	0.272727	0.6	0.1	0	40.4028	58.5833	18.1806
1	136	10	curved	1	3	10	0.664	97	18	R	F	1	Psyc	1	11	-7.6125	1	3	6	1	0	0.22	0.0909091	0.272727	0.6	0.1	0	40.4028	58.5833	18.1806
1	137	14	curved	1	8	20	0.715	32	18	R	F	1	Psyc	1	11	-7.6125	1	3	6	1	0	0.22	0.0909091	0.272727	0.6	0.1	0	40.4028	58.5833	18.1806
1	138	65	curved	1	4	10	0.849	43	18	R	F	1	Psyc	1	11	-7.6125	1	3	6	1	0	0.22	0.0909091	0.272727	0.6	0.1	0	40.4028	58.5833	18.1806
1	139	33	curved	1	10	20	0.785	57	18	R	F	1	Psyc	1	11	-7.6125	1	3	6	1	0	0.22	0.0909091	0.272727	0.6	0.1	0	40.4028	58.5833	18.1806
1	140	51	curved	1	10	20	0.845	96	18	R	F	1	Psyc	1	11	-7.6125	1	3	6	1	0	0.22	0.0909091	0.272727	0.6	0.1	0	40.4028	58.5833	18.1806
1	141	32	curved	1	8	20	0.782	59	18	R	F	1	Psyc	1	11	-7.6125	1	3	6	1	0	0.22	0.0909091	0.272727	0.6	0.1	0	40.4028	58.5833	18.1806
1	142	31	curved	1	6	20	2.354	70	18	R	F	1	Psyc	1	11	-7.6125	1	3	6	1	0	0.22	0.0909091	0.272727	0.6	0.1	0	40.4028	58.5833	18.1806
1	143	95	angular	0	8	20	0.733	17	18	R	F	1	Psyc	1	11	-7.6125	1	3	6	1	0	0.22	0.0909091	0.272727	0.6	0.1	0	40.4028	58.5833	18.1806
1	144	55	angular	0	3	10	0.768	8	18	R	F	1	Psyc	1	11	-7.6125	1	3	6	1	0	0.22	0.0909091	0.272727	0.6	0.1	0	40.4028	58.5833	18.1806
2	1	43	angular	0	9	30	1.018	36	18	R	F	1	Psyc	1	8	-10.6125	1	1	4	0	2	0.16	0.0909091	0.0909091	0.4	0	0.2	36.2083	58.2639	22.0556
2	2	57	angular	0	5	10	1.504	25	18	R	F	1	Psyc	1	8	-10.6125	1	1	4	0	2	0.16	0.0909091	0.0909091	0.4	0	0.2	36.2083	58.2639	22.0556
2	3	97	angular	0	9	30	1.152	30	18	R	F	1	Psyc	1	8	-10.6125	1	1	4	0	2	0.16	0.0909091	0.0909091	0.4	0	0.2	36.2083	58.2639	22.0556
2	4	74	angular	0	4	10	1.017	34	18	R	F	1	Psyc	1	8	-10.6125	1	1	4	0	2	0.16	0.0909091	0.0909091	0.4	0	0.2	36.2083	58.2639	22.0556
2	5	111	angular	0	5	10	1.32	23	18	R	F	1	Psyc	1	8	-10.6125	1	1	4	0	2	0.16	0.0909091	0.0909091	0.4	0	0.2	36.2083	58.2639	22.0556
2	6	96	angular	0	10	20	1.637	40	18	R	F	1	Psyc	1	8	-10.6125	1	1	4	0	2	0.16	0.0909091	0.0909091	0.4	0	0.2	36.2083	58.2639	22.0556
2	7	78	angular	0	10	20	1.353	16	18	R	F	1	Psyc	1	8	-10.6125	1	1	4	0	2	0.16	0.0909091	0.0909091	0.4	0	0.2	36.2083	58.2639	22.0556
2	8	3	angular	0	5	10	0.984	26	18	R	F	1	Psyc	1	8	-10.6125	1	1	4	0	2	0.16	0.0909091	0.0909091	0.4	0	0.2	36.2083	58.2639	22.0556
2	9	31	curved	1	6	20	1.12	59	18	R	F	1	Psyc	1	8	-10.6125	1	1	4	0	2	0.16	0.0909091	0.0909091	0.4	0	0.2	36.2083	58.2639	22.0556
2	10	133	angular	0	9	30	0.852	65	18	R	F	1	Psyc	1	8	-10.6125	1	1	4	0	2	0.16	0.0909091	0.0909091	0.4	0	0.2	36.2083	58.2639	22.0556
2	11	118	curved	1	3	10	0.918	49	18	R	F	1	Psyc	1	8	-10.6125	1	1	4	0	2	0.16	0.0909091	0.0909091	0.4	0	0.2	36.2083	58.2639	22.0556
2	12	95	angular	0	8	20	0.735	38	18	R	F	1	Psyc	1	8	-10.6125	1	1	4	0	2	0.16	0.0909091	0.0909091	0.4	0	0.2	36.2083	58.2639	22.0556
2	13	142	curved	1	9	30	1.952	65	18	R	F	1	Psyc	1	8	-10.6125	1	1	4	0	2	0.16	0.0909091	0.0909091	0.4	0	0.2	36.2083	58.2639	22.0556
2	14	44	angular	0	12	30	0.998	72	18	R	F	1	Psyc	1	8	-10.6125	1	1	4	0	2	0.16	0.0909091	0.0909091	0.4	0	0.2	36.2083	58.2639	22.0556
2	15	18	curved	1	15	30	1.099	62	18	R	F	1	Psyc	1	8	-10.6125	1	1	4	0	2	0.16	0.0909091	0.0909091	0.4	0	0.2	36.2083	58.2639	22.0556
2	16	70	curved	1	9	30	0.533	69	18	R	F	1	Psyc	1	8	-10.6125	1	1	4	0	2	0.16	0.0909091	0.0909091	0.4	0	0.2	36.2083	58.2639	22.0556
2	17	115	angular	0	9	30	1.133	45	18	R	F	1	Psyc	1	8	-10.6125	1	1	4	0	2	0.16	0.0909091	0.0909091	0.4	0	0.2	36.2083	58.2639	22.0556
2	18	79	angular	0	9	30	0.869	43	18	R	F	1	Psyc	1	8	-10.6125	1	1	4	0	2	0.16	0.0909091	0.0909091	0.4	0	0.2	36.2083	58.2639	22.0556
2	19	48	curved	1	5	10	0.982	63	18	R	F	1	Psyc	1	8	-10.6125	1	1	4	0	2	0.16	0.0909091	0.0909091	0.4	0	0.2	36.2083	58.2639	22.0556
2	20	6	angular	0	10	20	1.45	49	18	R	F	1	Psyc	1	8	-10.6125	1	1	4	0	2	0.16	0.0909091	0.0909091	0.4	0	0.2	36.2083	58.2639	22.0556
2	21	38	angular	0	4	10	0.532	34	18	R	F	1	Psyc	1	8	-10.6125	1	1	4	0	2	0.16	0.0909091	0.0909091	0.4	0	0.2	36.2083	58.2639	22.0556
2	22	92	angular	0	4	10	0.935	38	18	R	F	1	Psyc	1	8	-10.6125	1	1	4	0	2	0.16	0.0909091	0.0909091	0.4	0	0.2	36.2083	58.2639	22.0556
2	23	80	angular	0	12	30	1.148	16	18	R	F	1	Psyc	1	8	-10.6125	1	1	4	0	2	0.16	0.0909091	0.0909091	0.4	0	0.2	36.2083	58.2639	22.0556
2	24	49	curved	1	6	20	1.554	68	18	R	F	1	Psyc	1	8	-10.6125	1	1	4	0	2	0.16	0.0909091	0.0909091	0.4	0	0.2	36.2083	58.2639	22.0556
2	25	41	angular	0	8	20	0.732	43	18	R	F	1	Psyc	1	8	-10.6125	1	1	4	0	2	0.16	0.0909091	0.0909091	0.4	0	0.2	36.2083	58.2639	22.0556
2	26	63	angular	0	15	30	1.168	53	18	R	F	1	Psyc	1	8	-10.6125	1	1	4	0	2	0.16	0.0909091	0.0909091	0.4	0	0.2	36.2083	58.2639	22.0556
2	27	22	angular	0	6	20	3.172	32	18	R	F	1	Psyc	1	8	-10.6125	1	1	4	0	2	0.16	0.0909091	0.0909091	0.4	0	0.2	36.2083	58.2639	22.0556
2	28	55	angular	0	3	10	1.118	27	18	R	F	1	Psyc	1	8	-10.6125	1	1	4	0	2	0.16	0.0909091	0.0909091	0.4	0	0.2	36.2083	58.2639	22.0556
2	29	68	curved	1	8	20	1.215	61	18	R	F	1	Psyc	1	8	-10.6125	1	1	4	0	2	0.16	0.0909091	0.0909091	0.4	0	0.2	36.2083	58.2639	22.0556
2	30	105	curved	1	10	20	0.716	68	18	R	F	1	Psyc	1	8	-10.6125	1	1	4	0	2	0.16	0.0909091	0.0909091	0.4	0	0.2	36.2083	58.2639	22.0556
2	31	46	curved	1	3	10	1.033	52	18	R	F	1	Psyc	1	8	-10.6125	1	1	4	0	2	0.16	0.0909091	0.0909091	0.4	0	0.2	36.2083	58.2639	22.0556
2	32	39	angular	0	5	10	1.147	29	18	R	F	1	Psyc	1	8	-10.6125	1	1	4	0	2	0.16	0.0909091	0.0909091	0.4	0	0.2	36.2083	58.2639	22.0556
2	33	107	curved	1	12	30	0.964	65	18	R	F	1	Psyc	1	8	-10.6125	1	1	4	0	2	0.16	0.0909091	0.0909091	0.4	0	0.2	36.2083	58.2639	22.0556
2	34	87	curved	1	10	20	0.58	70	18	R	F	1	Psyc	1	8	-10.6125	1	1	4	0	2	0.16	0.0909091	0.0909091	0.4	0	0.2	36.2083	58.2639	22.0556
2	35	138	curved	1	5	10	0.986	66	18	R	F	1	Psyc	1	8	-10.6125	1	1	4	0	2	0.16	0.0909091	0.0909091	0.4	0	0.2	36.2083	58.2639	22.0556
2	36	126	curved	1	15	30	0.881	80	18	R	F	1	Psyc	1	8	-10.6125	1	1	4	0	2	0.16	0.0909091	0.0909091	0.4	0	0.2	36.2083	58.2639	22.0556
2	37	94	angular	0	6	20	0.716	41	18	R	F	1	Psyc	1	8	-10.6125	1	1	4	0	2	0.16	0.0909091	0.0909091	0.4	0	0.2	36.2083	58.2639	22.0556
2	38	128	angular	0	4	10	0.681	44	18	R	F	1	Psyc	1	8	-10.6125	1	1	4	0	2	0.16	0.0909091	0.0909091	0.4	0	0.2	36.2083	58.2639	22.0556
2	39	101	curved	1	4	10	1.583	63	18	R	F	1	Psyc	1	8	-10.6125	1	1	4	0	2	0.16	0.0909091	0.0909091	0.4	0	0.2	36.2083	58.2639	22.0556
2	40	42	angular	0	10	20	1.521	27	18	R	F	1	Psyc	1	8	-10.6125	1	1	4	0	2	0.16	0.0909091	0.0909091	0.4	0	0.2	36.2083	58.2639	22.0556
2	41	77	angular	0	8	20	1.05	33	18	R	F	1	Psyc	1	8	-10.6125	1	1	4	0	2	0.16	0.0909091	0.0909091	0.4	0	0.2	36.2083	58.2639	22.0556
2	42	131	angular	0	8	20	0.885	22	18	R	F	1	Psyc	1	8	-10.6125	1	1	4	0	2	0.16	0.0909091	0.0909091	0.4	0	0.2	36.2083	58.2639	22.0556
2	43	125	curved	1	12	30	1.35	64	18	R	F	1	Psyc	1	8	-10.6125	1	1	4	0	2	0.16	0.0909091	0.0909091	0.4	0	0.2	36.2083	58.2639	22.0556
2	44	100	curved	1	3	10	1.217	72	18	R	F	1	Psyc	1	8	-10.6125	1	1	4	0	2	0.16	0.0909091	0.0909091	0.4	0	0.2	36.2083	58.2639	22.0556
2	45	90	curved	1	15	30	0.968	65	18	R	F	1	Psyc	1	8	-10.6125	1	1	4	0	2	0.16	0.0909091	0.0909091	0.4	0	0.2	36.2083	58.2639	22.0556
2	46	71	curved	1	12	30	0.968	60	18	R	F	1	Psyc	1	8	-10.6125	1	1	4	0	2	0.16	0.0909091	0.0909091	0.4	0	0.2	36.2083	58.2639	22.0556
2	47	34	curved	1	9	30	0.947	71	18	R	F	1	Psyc	1	8	-10.6125	1	1	4	0	2	0.16	0.0909091	0.0909091	0.4	0	0.2	36.2083	58.2639	22.0556
2	48	12	curved	1	5	10	0.718	65	18	R	F	1	Psyc	1	8	-10.6125	1	1	4	0	2	0.16	0.0909091	0.0909091	0.4	0	0.2	36.2083	58.2639	22.0556
2	49	132	angular	0	10	20	0.749	39	18	R	F	1	Psyc	1	8	-10.6125	1	1	4	0	2	0.16	0.0909091	0.0909091	0.4	0	0.2	36.2083	58.2639	22.0556
2	50	9	angular	0	15	30	1.637	28	18	R	F	1	Psyc	1	8	-10.6125	1	1	4	0	2	0.16	0.0909091	0.0909091	0.4	0	0.2	36.2083	58.2639	22.0556
2	51	104	curved	1	8	20	1.349	51	18	R	F	1	Psyc	1	8	-10.6125	1	1	4	0	2	0.16	0.0909091	0.0909091	0.4	0	0.2	36.2083	58.2639	22.0556
2	52	109	angular	0	3	10	0.413	40	18	R	F	1	Psyc	1	8	-10.6125	1	1	4	0	2	0.16	0.0909091	0.0909091	0.4	0	0.2	36.2083	58.2639	22.0556
2	53	61	angular	0	9	30	0.869	40	18	R	F	1	Psyc	1	8	-10.6125	1	1	4	0	2	0.16	0.0909091	0.0909091	0.4	0	0.2	36.2083	58.2639	22.0556
2	54	37	angular	0	3	10	0.764	26	18	R	F	1	Psyc	1	8	-10.6125	1	1	4	0	2	0.16	0.0909091	0.0909091	0.4	0	0.2	36.2083	58.2639	22.0556
2	55	10	curved	1	3	10	1.031	55	18	R	F	1	Psyc	1	8	-10.6125	1	1	4	0	2	0.16	0.0909091	0.0909091	0.4	0	0.2	36.2083	58.2639	22.0556
2	56	11	curved	1	4	10	0.685	59	18	R	F	1	Psyc	1	8	-10.6125	1	1	4	0	2	0.16	0.0909091	0.0909091	0.4	0	0.2	36.2083	58.2639	22.0556
2	57	7	angular	0	9	30	1.803	37	18	R	F	1	Psyc	1	8	-10.6125	1	1	4	0	2	0.16	0.0909091	0.0909091	0.4	0	0.2	36.2083	58.2639	22.0556
2	58	124	curved	1	9	30	1.202	58	18	R	F	1	Psyc	1	8	-10.6125	1	1	4	0	2	0.16	0.0909091	0.0909091	0.4	0	0.2	36.2083	58.2639	22.0556
2	59	33	curved	1	10	20	0.648	66	18	R	F	1	Psyc	1	8	-10.6125	1	1	4	0	2	0.16	0.0909091	0.0909091	0.4	0	0.2	36.2083	58.2639	22.0556
2	60	123	curved	1	10	20	1.401	53	18	R	F	1	Psyc	1	8	-10.6125	1	1	4	0	2	0.16	0.0909091	0.0909091	0.4	0	0.2	36.2083	58.2639	22.0556
2	61	117	angular	0	15	30	0.747	33	18	R	F	1	Psyc	1	8	-10.6125	1	1	4	0	2	0.16	0.0909091	0.0909091	0.4	0	0.2	36.2083	58.2639	22.0556
2	62	25	angular	0	9	30	1.202	41	18	R	F	1	Psyc	1	8	-10.6125	1	1	4	0	2	0.16	0.0909091	0.0909091	0.4	0	0.2	36.2083	58.2639	22.0556
2	63	54	curved	1	15	30	1.068	65	18	R	F	1	Psyc	1	8	-10.6125	1	1	4	0	2	0.16	0.0909091	0.0909091	0.4	0	0.2	36.2083	58.2639	22.0556
2	64	47	curved	1	4	10	0.414	56	18	R	F	1	Psyc	1	8	-10.6125	1	1	4	0	2	0.16	0.0909091	0.0909091	0.4	0	0.2	36.2083	58.2639	22.0556
2	65	15	curved	1	10	20	0.564	47	18	R	F	1	Psyc	1	8	-10.6125	1	1	4	0	2	0.16	0.0909091	0.0909091	0.4	0	0.2	36.2083	58.2639	22.0556
2	66	114	angular	0	10	20	0.58	28	18	R	F	1	Psyc	1	8	-10.6125	1	1	4	0	2	0.16	0.0909091	0.0909091	0.4	0	0.2	36.2083	58.2639	22.0556
2	67	129	angular	0	5	10	0.48	35	18	R	F	1	Psyc	1	8	-10.6125	1	1	4	0	2	0.16	0.0909091	0.0909091	0.4	0	0.2	36.2083	58.2639	22.0556
2	68	60	angular	0	10	20	0.915	24	18	R	F	1	Psyc	1	8	-10.6125	1	1	4	0	2	0.16	0.0909091	0.0909091	0.4	0	0.2	36.2083	58.2639	22.0556
2	69	122	curved	1	8	20	0.412	45	18	R	F	1	Psyc	1	8	-10.6125	1	1	4	0	2	0.16	0.0909091	0.0909091	0.4	0	0.2	36.2083	58.2639	22.0556
2	70	21	angular	0	5	10	0.833	32	18	R	F	1	Psyc	1	8	-10.6125	1	1	4	0	2	0.16	0.0909091	0.0909091	0.4	0	0.2	36.2083	58.2639	22.0556
2	71	72	curved	1	15	30	0.698	61	18	R	F	1	Psyc	1	8	-10.6125	1	1	4	0	2	0.16	0.0909091	0.0909091	0.4	0	0.2	36.2083	58.2639	22.0556
2	72	86	curved	1	8	20	0.417	66	18	R	F	1	Psyc	1	8	-10.6125	1	1	4	0	2	0.16	0.0909091	0.0909091	0.4	0	0.2	36.2083	58.2639	22.0556
2	73	8	angular	0	12	30	0.865	37	18	R	F	1	Psyc	1	8	-10.6125	1	1	4	0	2	0.16	0.0909091	0.0909091	0.4	0	0.2	36.2083	58.2639	22.0556
2	74	19	angular	0	3	10	0.413	28	18	R	F	1	Psyc	1	8	-10.6125	1	1	4	0	2	0.16	0.0909091	0.0909091	0.4	0	0.2	36.2083	58.2639	22.0556
2	75	143	curved	1	12	30	1.035	44	18	R	F	1	Psyc	1	8	-10.6125	1	1	4	0	2	0.16	0.0909091	0.0909091	0.4	0	0.2	36.2083	58.2639	22.0556
2	76	36	curved	1	15	30	0.411	54	18	R	F	1	Psyc	1	8	-10.6125	1	1	4	0	2	0.16	0.0909091	0.0909091	0.4	0	0.2	36.2083	58.2639	22.0556
2	77	136	curved	1	3	10	0.597	48	18	R	F	1	Psyc	1	8	-10.6125	1	1	4	0	2	0.16	0.0909091	0.0909091	0.4	0	0.2	36.2083	58.2639	22.0556
2	78	85	curved	1	6	20	0.416	35	18	R	F	1	Psyc	1	8	-10.6125	1	1	4	0	2	0.16	0.0909091	0.0909091	0.4	0	0.2	36.2083	58.2639	22.0556
2	79	84	curved	1	5	10	0.413	54	18	R	F	1	Psyc	1	8	-10.6125	1	1	4	0	2	0.16	0.0909091	0.0909091	0.4	0	0.2	36.2083	58.2639	22.0556
2	80	16	curved	1	9	30	0.513	31	18	R	F	1	Psyc	1	8	-10.6125	1	1	4	0	2	0.16	0.0909091	0.0909091	0.4	0	0.2	36.2083	58.2639	22.0556
2	81	58	angular	0	6	20	0.649	42	18	R	F	1	Psyc	1	8	-10.6125	1	1	4	0	2	0.16	0.0909091	0.0909091	0.4	0	0.2	36.2083	58.2639	22.0556
2	82	64	curved	1	3	10	0.663	59	18	R	F	1	Psyc	1	8	-10.6125	1	1	4	0	2	0.16	0.0909091	0.0909091	0.4	0	0.2	36.2083	58.2639	22.0556
2	83	112	angular	0	6	20	1.67	46	18	R	F	1	Psyc	1	8	-10.6125	1	1	4	0	2	0.16	0.0909091	0.0909091	0.4	0	0.2	36.2083	58.2639	22.0556
2	84	91	angular	0	3	10	1.499	33	18	R	F	1	Psyc	1	8	-10.6125	1	1	4	0	2	0.16	0.0909091	0.0909091	0.4	0	0.2	36.2083	58.2639	22.0556
2	85	103	curved	1	6	20	3.877	60	18	R	F	1	Psyc	1	8	-10.6125	1	1	4	0	2	0.16	0.0909091	0.0909091	0.4	0	0.2	36.2083	58.2639	22.0556
2	86	106	curved	1	9	30	1.637	72	18	R	F	1	Psyc	1	8	-10.6125	1	1	4	0	2	0.16	0.0909091	0.0909091	0.4	0	0.2	36.2083	58.2639	22.0556
2	87	93	angular	0	5	10	1.066	39	18	R	F	1	Psyc	1	8	-10.6125	1	1	4	0	2	0.16	0.0909091	0.0909091	0.4	0	0.2	36.2083	58.2639	22.0556
2	88	65	curved	1	4	10	0.714	59	18	R	F	1	Psyc	1	8	-10.6125	1	1	4	0	2	0.16	0.0909091	0.0909091	0.4	0	0.2	36.2083	58.2639	22.0556
2	89	30	curved	1	5	10	0.564	66	18	R	F	1	Psyc	1	8	-10.6125	1	1	4	0	2	0.16	0.0909091	0.0909091	0.4	0	0.2	36.2083	58.2639	22.0556
2	90	53	curved	1	12	30	0.414	74	18	R	F	1	Psyc	1	8	-10.6125	1	1	4	0	2	0.16	0.0909091	0.0909091	0.4	0	0.2	36.2083	58.2639	22.0556
2	91	76	angular	0	6	20	0.931	34	18	R	F	1	Psyc	1	8	-10.6125	1	1	4	0	2	0.16	0.0909091	0.0909091	0.4	0	0.2	36.2083	58.2639	22.0556
2	92	67	curved	1	6	20	0.431	43	18	R	F	1	Psyc	1	8	-10.6125	1	1	4	0	2	0.16	0.0909091	0.0909091	0.4	0	0.2	36.2083	58.2639	22.0556
2	93	4	angular	0	6	20	0.932	27	18	R	F	1	Psyc	1	8	-10.6125	1	1	4	0	2	0.16	0.0909091	0.0909091	0.4	0	0.2	36.2083	58.2639	22.0556
2	94	20	angular	0	4	10	0.447	53	18	R	F	1	Psyc	1	8	-10.6125	1	1	4	0	2	0.16	0.0909091	0.0909091	0.4	0	0.2	36.2083	58.2639	22.0556
2	95	5	angular	0	8	20	0.515	39	18	R	F	1	Psyc	1	8	-10.6125	1	1	4	0	2	0.16	0.0909091	0.0909091	0.4	0	0.2	36.2083	58.2639	22.0556
2	96	135	angular	0	15	30	0.513	31	18	R	F	1	Psyc	1	8	-10.6125	1	1	4	0	2	0.16	0.0909091	0.0909091	0.4	0	0.2	36.2083	58.2639	22.0556
2	97	113	angular	0	8	20	0.78	21	18	R	F	1	Psyc	1	8	-10.6125	1	1	4	0	2	0.16	0.0909091	0.0909091	0.4	0	0.2	36.2083	58.2639	22.0556
2	98	59	angular	0	8	20	0.414	13	18	R	F	1	Psyc	1	8	-10.6125	1	1	4	0	2	0.16	0.0909091	0.0909091	0.4	0	0.2	36.2083	58.2639	22.0556
2	99	45	angular	0	15	30	0.765	42	18	R	F	1	Psyc	1	8	-10.6125	1	1	4	0	2	0.16	0.0909091	0.0909091	0.4	0	0.2	36.2083	58.2639	22.0556
2	100	108	curved	1	15	30	0.413	63	18	R	F	1	Psyc	1	8	-10.6125	1	1	4	0	2	0.16	0.0909091	0.0909091	0.4	0	0.2	36.2083	58.2639	22.0556
2	101	137	curved	1	4	10	2.035	68	18	R	F	1	Psyc	1	8	-10.6125	1	1	4	0	2	0.16	0.0909091	0.0909091	0.4	0	0.2	36.2083	58.2639	22.0556
2	102	27	angular	0	15	30	0.647	37	18	R	F	1	Psyc	1	8	-10.6125	1	1	4	0	2	0.16	0.0909091	0.0909091	0.4	0	0.2	36.2083	58.2639	22.0556
2	103	139	curved	1	6	20	0.664	60	18	R	F	1	Psyc	1	8	-10.6125	1	1	4	0	2	0.16	0.0909091	0.0909091	0.4	0	0.2	36.2083	58.2639	22.0556
2	104	110	angular	0	4	10	0.431	48	18	R	F	1	Psyc	1	8	-10.6125	1	1	4	0	2	0.16	0.0909091	0.0909091	0.4	0	0.2	36.2083	58.2639	22.0556
2	105	1	angular	0	3	10	0.548	38	18	R	F	1	Psyc	1	8	-10.6125	1	1	4	0	2	0.16	0.0909091	0.0909091	0.4	0	0.2	36.2083	58.2639	22.0556
2	106	40	angular	0	6	20	1.219	29	18	R	F	1	Psyc	1	8	-10.6125	1	1	4	0	2	0.16	0.0909091	0.0909091	0.4	0	0.2	36.2083	58.2639	22.0556
2	107	2	angular	0	4	10	2.287	39	18	R	F	1	Psyc	1	8	-10.6125	1	1	4	0	2	0.16	0.0909091	0.0909091	0.4	0	0.2	36.2083	58.2639	22.0556
2	108	134	angular	0	12	30	0.631	55	18	R	F	1	Psyc	1	8	-10.6125	1	1	4	0	2	0.16	0.0909091	0.0909091	0.4	0	0.2	36.2083	58.2639	22.0556
2	109	83	curved	1	4	10	0.743	60	18	R	F	1	Psyc	1	8	-10.6125	1	1	4	0	2	0.16	0.0909091	0.0909091	0.4	0	0.2	36.2083	58.2639	22.0556
2	110	24	angular	0	10	20	0.745	31	18	R	F	1	Psyc	1	8	-10.6125	1	1	4	0	2	0.16	0.0909091	0.0909091	0.4	0	0.2	36.2083	58.2639	22.0556
2	111	51	curved	1	10	20	2.11	65	18	R	F	1	Psyc	1	8	-10.6125	1	1	4	0	2	0.16	0.0909091	0.0909091	0.4	0	0.2	36.2083	58.2639	22.0556
2	112	69	curved	1	10	20	1.065	54	18	R	F	1	Psyc	1	8	-10.6125	1	1	4	0	2	0.16	0.0909091	0.0909091	0.4	0	0.2	36.2083	58.2639	22.0556
2	113	81	angular	0	15	30	0.966	42	18	R	F	1	Psyc	1	8	-10.6125	1	1	4	0	2	0.16	0.0909091	0.0909091	0.4	0	0.2	36.2083	58.2639	22.0556
2	114	17	curved	1	12	30	1.031	70	18	R	F	1	Psyc	1	8	-10.6125	1	1	4	0	2	0.16	0.0909091	0.0909091	0.4	0	0.2	36.2083	58.2639	22.0556
2	115	52	curved	1	9	30	0.651	65	18	R	F	1	Psyc	1	8	-10.6125	1	1	4	0	2	0.16	0.0909091	0.0909091	0.4	0	0.2	36.2083	58.2639	22.0556
2	116	62	angular	0	12	30	0.6	41	18	R	F	1	Psyc	1	8	-10.6125	1	1	4	0	2	0.16	0.0909091	0.0909091	0.4	0	0.2	36.2083	58.2639	22.0556
2	117	116	angular	0	12	30	0.832	31	18	R	F	1	Psyc	1	8	-10.6125	1	1	4	0	2	0.16	0.0909091	0.0909091	0.4	0	0.2	36.2083	58.2639	22.0556
2	118	140	curved	1	8	20	0.914	40	18	R	F	1	Psyc	1	8	-10.6125	1	1	4	0	2	0.16	0.0909091	0.0909091	0.4	0	0.2	36.2083	58.2639	22.0556
2	119	56	angular	0	4	10	0.583	33	18	R	F	1	Psyc	1	8	-10.6125	1	1	4	0	2	0.16	0.0909091	0.0909091	0.4	0	0.2	36.2083	58.2639	22.0556
2	120	82	curved	1	3	10	1.202	42	18	R	F	1	Psyc	1	8	-10.6125	1	1	4	0	2	0.16	0.0909091	0.0909091	0.4	0	0.2	36.2083	58.2639	22.0556
2	121	26	angular	0	12	30	0.898	35	18	R	F	1	Psyc	1	8	-10.6125	1	1	4	0	2	0.16	0.0909091	0.0909091	0.4	0	0.2	36.2083	58.2639	22.0556
2	122	119	curved	1	4	10	0.813	43	18	R	F	1	Psyc	1	8	-10.6125	1	1	4	0	2	0.16	0.0909091	0.0909091	0.4	0	0.2	36.2083	58.2639	22.0556
2	123	35	curved	1	12	30	0.53	59	18	R	F	1	Psyc	1	8	-10.6125	1	1	4	0	2	0.16	0.0909091	0.0909091	0.4	0	0.2	36.2083	58.2639	22.0556
2	124	32	curved	1	8	20	0.584	51	18	R	F	1	Psyc	1	8	-10.6125	1	1	4	0	2	0.16	0.0909091	0.0909091	0.4	0	0.2	36.2083	58.2639	22.0556
2	125	23	angular	0	8	20	1.634	26	18	R	F	1	Psyc	1	8	-10.6125	1	1	4	0	2	0.16	0.0909091	0.0909091	0.4	0	0.2	36.2083	58.2639	22.0556
2	126	141	curved	1	10	20	0.783	58	18	R	F	1	Psyc	1	8	-10.6125	1	1	4	0	2	0.16	0.0909091	0.0909091	0.4	0	0.2	36.2083	58.2639	22.0556
2	127	127	angular	0	3	10	0.449	41	18	R	F	1	Psyc	1	8	-10.6125	1	1	4	0	2	0.16	0.0909091	0.0909091	0.4	0	0.2	36.2083	58.2639	22.0556
2	128	88	curved	1	9	30	0.516	68	18	R	F	1	Psyc	1	8	-10.6125	1	1	4	0	2	0.16	0.0909091	0.0909091	0.4	0	0.2	36.2083	58.2639	22.0556
2	129	120	curved	1	5	10	0.463	57	18	R	F	1	Psyc	1	8	-10.6125	1	1	4	0	2	0.16	0.0909091	0.0909091	0.4	0	0.2	36.2083	58.2639	22.0556
2	130	73	angular	0	3	10	0.731	32	18	R	F	1	Psyc	1	8	-10.6125	1	1	4	0	2	0.16	0.0909091	0.0909091	0.4	0	0.2	36.2083	58.2639	22.0556
2	131	144	curved	1	15	30	1.471	63	18	R	F	1	Psyc	1	8	-10.6125	1	1	4	0	2	0.16	0.0909091	0.0909091	0.4	0	0.2	36.2083	58.2639	22.0556
2	132	98	angular	0	12	30	0.665	46	18	R	F	1	Psyc	1	8	-10.6125	1	1	4	0	2	0.16	0.0909091	0.0909091	0.4	0	0.2	36.2083	58.2639	22.0556
2	133	130	angular	0	6	20	0.616	39	18	R	F	1	Psyc	1	8	-10.6125	1	1	4	0	2	0.16	0.0909091	0.0909091	0.4	0	0.2	36.2083	58.2639	22.0556
2	134	14	curved	1	8	20	0.684	61	18	R	F	1	Psyc	1	8	-10.6125	1	1	4	0	2	0.16	0.0909091	0.0909091	0.4	0	0.2	36.2083	58.2639	22.0556
2	135	13	curved	1	6	20	0.834	41	18	R	F	1	Psyc	1	8	-10.6125	1	1	4	0	2	0.16	0.0909091	0.0909091	0.4	0	0.2	36.2083	58.2639	22.0556
2	136	89	curved	1	12	30	0.852	58	18	R	F	1	Psyc	1	8	-10.6125	1	1	4	0	2	0.16	0.0909091	0.0909091	0.4	0	0.2	36.2083	58.2639	22.0556
2	137	28	curved	1	3	10	0.915	51	18	R	F	1	Psyc	1	8	-10.6125	1	1	4	0	2	0.16	0.0909091	0.0909091	0.4	0	0.2	36.2083	58.2639	22.0556
2	138	50	curved	1	8	20	0.731	33	18	R	F	1	Psyc	1	8	-10.6125	1	1	4	0	2	0.16	0.0909091	0.0909091	0.4	0	0.2	36.2083	58.2639	22.0556
2	139	121	curved	1	6	20	0.684	48	18	R	F	1	Psyc	1	8	-10.6125	1	1	4	0	2	0.16	0.0909091	0.0909091	0.4	0	0.2	36.2083	58.2639	22.0556
2	140	66	curved	1	5	10	0.916	63	18	R	F	1	Psyc	1	8	-10.6125	1	1	4	0	2	0.16	0.0909091	0.0909091	0.4	0	0.2	36.2083	58.2639	22.0556
2	141	99	angular	0	15	30	0.968	53	18	R	F	1	Psyc	1	8	-10.6125	1	1	4	0	2	0.16	0.0909091	0.0909091	0.4	0	0.2	36.2083	58.2639	22.0556
2	142	75	angular	0	5	10	0.467	42	18	R	F	1	Psyc	1	8	-10.6125	1	1	4	0	2	0.16	0.0909091	0.0909091	0.4	0	0.2	36.2083	58.2639	22.0556
2	143	29	curved	1	4	10	1.051	53	18	R	F	1	Psyc	1	8	-10.6125	1	1	4	0	2	0.16	0.0909091	0.0909091	0.4	0	0.2	36.2083	58.2639	22.0556
2	144	102	curved	1	5	10	0.598	63	18	R	F	1	Psyc	1	8	-10.6125	1	1	4	0	2	0.16	0.0909091	0.0909091	0.4	0	0.2	36.2083	58.2639	22.0556
3	1	43	angular	0	9	30	1.52	10	18	R	F	1	Psyc	1	20	1.3875	4	6	2	5	3	0.4	0.363636	0.545455	0.2	0.5	0.3	16.5972	51.8472	35.25
3	2	57	angular	0	5	10	0.58	15	18	R	F	1	Psyc	1	20	1.3875	4	6	2	5	3	0.4	0.363636	0.545455	0.2	0.5	0.3	16.5972	51.8472	35.25
3	3	97	angular	0	9	30	0.918	6	18	R	F	1	Psyc	1	20	1.3875	4	6	2	5	3	0.4	0.363636	0.545455	0.2	0.5	0.3	16.5972	51.8472	35.25
3	4	74	angular	0	4	10	0.898	22	18	R	F	1	Psyc	1	20	1.3875	4	6	2	5	3	0.4	0.363636	0.545455	0.2	0.5	0.3	16.5972	51.8472	35.25
3	5	111	angular	0	5	10	0.73	18	18	R	F	1	Psyc	1	20	1.3875	4	6	2	5	3	0.4	0.363636	0.545455	0.2	0.5	0.3	16.5972	51.8472	35.25
3	6	96	angular	0	10	20	0.631	10	18	R	F	1	Psyc	1	20	1.3875	4	6	2	5	3	0.4	0.363636	0.545455	0.2	0.5	0.3	16.5972	51.8472	35.25
3	7	78	angular	0	10	20	1.851	3	18	R	F	1	Psyc	1	20	1.3875	4	6	2	5	3	0.4	0.363636	0.545455	0.2	0.5	0.3	16.5972	51.8472	35.25
3	8	3	angular	0	5	10	0.933	32	18	R	F	1	Psyc	1	20	1.3875	4	6	2	5	3	0.4	0.363636	0.545455	0.2	0.5	0.3	16.5972	51.8472	35.25
3	9	31	curved	1	6	20	1.518	56	18	R	F	1	Psyc	1	20	1.3875	4	6	2	5	3	0.4	0.363636	0.545455	0.2	0.5	0.3	16.5972	51.8472	35.25
3	10	133	angular	0	9	30	3.706	15	18	R	F	1	Psyc	1	20	1.3875	4	6	2	5	3	0.4	0.363636	0.545455	0.2	0.5	0.3	16.5972	51.8472	35.25
3	11	118	curved	1	3	10	1.5	81	18	R	F	1	Psyc	1	20	1.3875	4	6	2	5	3	0.4	0.363636	0.545455	0.2	0.5	0.3	16.5972	51.8472	35.25
3	12	95	angular	0	8	20	1.55	18	18	R	F	1	Psyc	1	20	1.3875	4	6	2	5	3	0.4	0.363636	0.545455	0.2	0.5	0.3	16.5972	51.8472	35.25
3	13	142	curved	1	9	30	1.655	34	18	R	F	1	Psyc	1	20	1.3875	4	6	2	5	3	0.4	0.363636	0.545455	0.2	0.5	0.3	16.5972	51.8472	35.25
3	14	44	angular	0	12	30	1.839	30	18	R	F	1	Psyc	1	20	1.3875	4	6	2	5	3	0.4	0.363636	0.545455	0.2	0.5	0.3	16.5972	51.8472	35.25
3	15	18	curved	1	15	30	0.951	28	18	R	F	1	Psyc	1	20	1.3875	4	6	2	5	3	0.4	0.363636	0.545455	0.2	0.5	0.3	16.5972	51.8472	35.25
3	16	70	curved	1	9	30	0.664	60	18	R	F	1	Psyc	1	20	1.3875	4	6	2	5	3	0.4	0.363636	0.545455	0.2	0.5	0.3	16.5972	51.8472	35.25
3	17	115	angular	0	9	30	0.967	7	18	R	F	1	Psyc	1	20	1.3875	4	6	2	5	3	0.4	0.363636	0.545455	0.2	0.5	0.3	16.5972	51.8472	35.25
3	18	79	angular	0	9	30	0.665	14	18	R	F	1	Psyc	1	20	1.3875	4	6	2	5	3	0.4	0.363636	0.545455	0.2	0.5	0.3	16.5972	51.8472	35.25
3	19	48	curved	1	5	10	2.121	80	18	R	F	1	Psyc	1	20	1.3875	4	6	2	5	3	0.4	0.363636	0.545455	0.2	0.5	0.3	16.5972	51.8472	35.25
3	20	6	angular	0	10	20	1.333	13	18	R	F	1	Psyc	1	20	1.3875	4	6	2	5	3	0.4	0.363636	0.545455	0.2	0.5	0.3	16.5972	51.8472	35.25
3	21	38	angular	0	4	10	0.731	33	18	R	F	1	Psyc	1	20	1.3875	4	6	2	5	3	0.4	0.363636	0.545455	0.2	0.5	0.3	16.5972	51.8472	35.25
3	22	92	angular	0	4	10	0.517	40	18	R	F	1	Psyc	1	20	1.3875	4	6	2	5	3	0.4	0.363636	0.545455	0.2	0.5	0.3	16.5972	51.8472	35.25
3	23	80	angular	0	12	30	0.732	7	18	R	F	1	Psyc	1	20	1.3875	4	6	2	5	3	0.4	0.363636	0.545455	0.2	0.5	0.3	16.5972	51.8472	35.25
3	24	49	curved	1	6	20	1.184	64	18	R	F	1	Psyc	1	20	1.3875	4	6	2	5	3	0.4	0.363636	0.545455	0.2	0.5	0.3	16.5972	51.8472	35.25
3	25	41	angular	0	8	20	2.871	7	18	R	F	1	Psyc	1	20	1.3875	4	6	2	5	3	0.4	0.363636	0.545455	0.2	0.5	0.3	16.5972	51.8472	35.25
3	26	63	angular	0	15	30	1.032	3	18	R	F	1	Psyc	1	20	1.3875	4	6	2	5	3	0.4	0.363636	0.545455	0.2	0.5	0.3	16.5972	51.8472	35.25
3	27	22	angular	0	6	20	0.664	9	18	R	F	1	Psyc	1	20	1.3875	4	6	2	5	3	0.4	0.363636	0.545455	0.2	0.5	0.3	16.5972	51.8472	35.25
3	28	55	angular	0	3	10	0.548	20	18	R	F	1	Psyc	1	20	1.3875	4	6	2	5	3	0.4	0.363636	0.545455	0.2	0.5	0.3	16.5972	51.8472	35.25
3	29	68	curved	1	8	20	1.516	73	18	R	F	1	Psyc	1	20	1.3875	4	6	2	5	3	0.4	0.363636	0.545455	0.2	0.5	0.3	16.5972	51.8472	35.25
3	30	105	curved	1	10	20	0.915	61	18	R	F	1	Psyc	1	20	1.3875	4	6	2	5	3	0.4	0.363636	0.545455	0.2	0.5	0.3	16.5972	51.8472	35.25
3	31	46	curved	1	3	10	0.598	82	18	R	F	1	Psyc	1	20	1.3875	4	6	2	5	3	0.4	0.363636	0.545455	0.2	0.5	0.3	16.5972	51.8472	35.25
3	32	39	angular	0	5	10	1.803	14	18	R	F	1	Psyc	1	20	1.3875	4	6	2	5	3	0.4	0.363636	0.545455	0.2	0.5	0.3	16.5972	51.8472	35.25
3	33	107	curved	1	12	30	2.103	35	18	R	F	1	Psyc	1	20	1.3875	4	6	2	5	3	0.4	0.363636	0.545455	0.2	0.5	0.3	16.5972	51.8472	35.25
3	34	87	curved	1	10	20	2.67	55	18	R	F	1	Psyc	1	20	1.3875	4	6	2	5	3	0.4	0.363636	0.545455	0.2	0.5	0.3	16.5972	51.8472	35.25
3	35	138	curved	1	5	10	1.135	87	18	R	F	1	Psyc	1	20	1.3875	4	6	2	5	3	0.4	0.363636	0.545455	0.2	0.5	0.3	16.5972	51.8472	35.25
3	36	126	curved	1	15	30	1.049	53	18	R	F	1	Psyc	1	20	1.3875	4	6	2	5	3	0.4	0.363636	0.545455	0.2	0.5	0.3	16.5972	51.8472	35.25
3	37	94	angular	0	6	20	1.115	13	18	R	F	1	Psyc	1	20	1.3875	4	6	2	5	3	0.4	0.363636	0.545455	0.2	0.5	0.3	16.5972	51.8472	35.25
3	38	128	angular	0	4	10	0.645	32	18	R	F	1	Psyc	1	20	1.3875	4	6	2	5	3	0.4	0.363636	0.545455	0.2	0.5	0.3	16.5972	51.8472	35.25
3	39	101	curved	1	4	10	1.533	68	18	R	F	1	Psyc	1	20	1.3875	4	6	2	5	3	0.4	0.363636	0.545455	0.2	0.5	0.3	16.5972	51.8472	35.25
3	40	42	angular	0	10	20	1.971	16	18	R	F	1	Psyc	1	20	1.3875	4	6	2	5	3	0.4	0.363636	0.545455	0.2	0.5	0.3	16.5972	51.8472	35.25
3	41	77	angular	0	8	20	0.732	6	18	R	F	1	Psyc	1	20	1.3875	4	6	2	5	3	0.4	0.363636	0.545455	0.2	0.5	0.3	16.5972	51.8472	35.25
3	42	131	angular	0	8	20	0.417	6	18	R	F	1	Psyc	1	20	1.3875	4	6	2	5	3	0.4	0.363636	0.545455	0.2	0.5	0.3	16.5972	51.8472	35.25
3	43	125	curved	1	12	30	0.849	31	18	R	F	1	Psyc	1	20	1.3875	4	6	2	5	3	0.4	0.363636	0.545455	0.2	0.5	0.3	16.5972	51.8472	35.25
3	44	100	curved	1	3	10	1.047	82	18	R	F	1	Psyc	1	20	1.3875	4	6	2	5	3	0.4	0.363636	0.545455	0.2	0.5	0.3	16.5972	51.8472	35.25
3	45	90	curved	1	15	30	0.847	61	18	R	F	1	Psyc	1	20	1.3875	4	6	2	5	3	0.4	0.363636	0.545455	0.2	0.5	0.3	16.5972	51.8472	35.25
3	46	71	curved	1	12	30	0.814	40	18	R	F	1	Psyc	1	20	1.3875	4	6	2	5	3	0.4	0.363636	0.545455	0.2	0.5	0.3	16.5972	51.8472	35.25
3	47	34	curved	1	9	30	1.266	46	18	R	F	1	Psyc	1	20	1.3875	4	6	2	5	3	0.4	0.363636	0.545455	0.2	0.5	0.3	16.5972	51.8472	35.25
3	48	12	curved	1	5	10	3.093	77	18	R	F	1	Psyc	1	20	1.3875	4	6	2	5	3	0.4	0.363636	0.545455	0.2	0.5	0.3	16.5972	51.8472	35.25
3	49	132	angular	0	10	20	1	23	18	R	F	1	Psyc	1	20	1.3875	4	6	2	5	3	0.4	0.363636	0.545455	0.2	0.5	0.3	16.5972	51.8472	35.25
3	50	9	angular	0	15	30	1.704	12	18	R	F	1	Psyc	1	20	1.3875	4	6	2	5	3	0.4	0.363636	0.545455	0.2	0.5	0.3	16.5972	51.8472	35.25
3	51	104	curved	1	8	20	1.433	34	18	R	F	1	Psyc	1	20	1.3875	4	6	2	5	3	0.4	0.363636	0.545455	0.2	0.5	0.3	16.5972	51.8472	35.25
3	52	109	angular	0	3	10	0.798	31	18	R	F	1	Psyc	1	20	1.3875	4	6	2	5	3	0.4	0.363636	0.545455	0.2	0.5	0.3	16.5972	51.8472	35.25
3	53	61	angular	0	9	30	0.566	16	18	R	F	1	Psyc	1	20	1.3875	4	6	2	5	3	0.4	0.363636	0.545455	0.2	0.5	0.3	16.5972	51.8472	35.25
3	54	37	angular	0	3	10	0.881	33	18	R	F	1	Psyc	1	20	1.3875	4	6	2	5	3	0.4	0.363636	0.545455	0.2	0.5	0.3	16.5972	51.8472	35.25
3	55	10	curved	1	3	10	0.698	61	18	R	F	1	Psyc	1	20	1.3875	4	6	2	5	3	0.4	0.363636	0.545455	0.2	0.5	0.3	16.5972	51.8472	35.25
3	56	11	curved	1	4	10	0.931	69	18	R	F	1	Psyc	1	20	1.3875	4	6	2	5	3	0.4	0.363636	0.545455	0.2	0.5	0.3	16.5972	51.8472	35.25
3	57	7	angular	0	9	30	2.789	18	18	R	F	1	Psyc	1	20	1.3875	4	6	2	5	3	0.4	0.363636	0.545455	0.2	0.5	0.3	16.5972	51.8472	35.25
3	58	124	curved	1	9	30	0.797	44	18	R	F	1	Psyc	1	20	1.3875	4	6	2	5	3	0.4	0.363636	0.545455	0.2	0.5	0.3	16.5972	51.8472	35.25
3	59	33	curved	1	10	20	0.6	39	18	R	F	1	Psyc	1	20	1.3875	4	6	2	5	3	0.4	0.363636	0.545455	0.2	0.5	0.3	16.5972	51.8472	35.25
3	60	123	curved	1	10	20	0.564	39	18	R	F	1	Psyc	1	20	1.3875	4	6	2	5	3	0.4	0.363636	0.545455	0.2	0.5	0.3	16.5972	51.8472	35.25
3	61	117	angular	0	15	30	0.901	11	18	R	F	1	Psyc	1	20	1.3875	4	6	2	5	3	0.4	0.363636	0.545455	0.2	0.5	0.3	16.5972	51.8472	35.25
3	62	25	angular	0	9	30	0.599	21	18	R	F	1	Psyc	1	20	1.3875	4	6	2	5	3	0.4	0.363636	0.545455	0.2	0.5	0.3	16.5972	51.8472	35.25
3	63	54	curved	1	15	30	1.052	14	18	R	F	1	Psyc	1	20	1.3875	4	6	2	5	3	0.4	0.363636	0.545455	0.2	0.5	0.3	16.5972	51.8472	35.25
3	64	47	curved	1	4	10	1.299	72	18	R	F	1	Psyc	1	20	1.3875	4	6	2	5	3	0.4	0.363636	0.545455	0.2	0.5	0.3	16.5972	51.8472	35.25
3	65	15	curved	1	10	20	1.015	51	18	R	F	1	Psyc	1	20	1.3875	4	6	2	5	3	0.4	0.363636	0.545455	0.2	0.5	0.3	16.5972	51.8472	35.25
3	66	114	angular	0	10	20	0.681	22	18	R	F	1	Psyc	1	20	1.3875	4	6	2	5	3	0.4	0.363636	0.545455	0.2	0.5	0.3	16.5972	51.8472	35.25
3	67	129	angular	0	5	10	0.598	34	18	R	F	1	Psyc	1	20	1.3875	4	6	2	5	3	0.4	0.363636	0.545455	0.2	0.5	0.3	16.5972	51.8472	35.25
3	68	60	angular	0	10	20	1.149	14	18	R	F	1	Psyc	1	20	1.3875	4	6	2	5	3	0.4	0.363636	0.545455	0.2	0.5	0.3	16.5972	51.8472	35.25
3	69	122	curved	1	8	20	1.471	19	18	R	F	1	Psyc	1	20	1.3875	4	6	2	5	3	0.4	0.363636	0.545455	0.2	0.5	0.3	16.5972	51.8472	35.25
3	70	21	angular	0	5	10	0.681	42	18	R	F	1	Psyc	1	20	1.3875	4	6	2	5	3	0.4	0.363636	0.545455	0.2	0.5	0.3	16.5972	51.8472	35.25
3	71	72	curved	1	15	30	1.1	19	18	R	F	1	Psyc	1	20	1.3875	4	6	2	5	3	0.4	0.363636	0.545455	0.2	0.5	0.3	16.5972	51.8472	35.25
3	72	86	curved	1	8	20	1.082	68	18	R	F	1	Psyc	1	20	1.3875	4	6	2	5	3	0.4	0.363636	0.545455	0.2	0.5	0.3	16.5972	51.8472	35.25
3	73	8	angular	0	12	30	0.914	14	18	R	F	1	Psyc	1	20	1.3875	4	6	2	5	3	0.4	0.363636	0.545455	0.2	0.5	0.3	16.5972	51.8472	35.25
3	74	19	angular	0	3	10	0.781	35	18	R	F	1	Psyc	1	20	1.3875	4	6	2	5	3	0.4	0.363636	0.545455	0.2	0.5	0.3	16.5972	51.8472	35.25
3	75	143	curved	1	12	30	2.004	29	18	R	F	1	Psyc	1	20	1.3875	4	6	2	5	3	0.4	0.363636	0.545455	0.2	0.5	0.3	16.5972	51.8472	35.25
3	76	36	curved	1	15	30	0.914	19	18	R	F	1	Psyc	1	20	1.3875	4	6	2	5	3	0.4	0.363636	0.545455	0.2	0.5	0.3	16.5972	51.8472	35.25
3	77	136	curved	1	3	10	1.197	81	18	R	F	1	Psyc	1	20	1.3875	4	6	2	5	3	0.4	0.363636	0.545455	0.2	0.5	0.3	16.5972	51.8472	35.25
3	78	85	curved	1	6	20	2.322	21	18	R	F	1	Psyc	1	20	1.3875	4	6	2	5	3	0.4	0.363636	0.545455	0.2	0.5	0.3	16.5972	51.8472	35.25
3	79	84	curved	1	5	10	1.821	69	18	R	F	1	Psyc	1	20	1.3875	4	6	2	5	3	0.4	0.363636	0.545455	0.2	0.5	0.3	16.5972	51.8472	35.25
3	80	16	curved	1	9	30	2.22	29	18	R	F	1	Psyc	1	20	1.3875	4	6	2	5	3	0.4	0.363636	0.545455	0.2	0.5	0.3	16.5972	51.8472	35.25
3	81	58	angular	0	6	20	0.596	16	18	R	F	1	Psyc	1	20	1.3875	4	6	2	5	3	0.4	0.363636	0.545455	0.2	0.5	0.3	16.5972	51.8472	35.25
3	82	64	curved	1	3	10	1.234	83	18	R	F	1	Psyc	1	20	1.3875	4	6	2	5	3	0.4	0.363636	0.545455	0.2	0.5	0.3	16.5972	51.8472	35.25
3	83	112	angular	0	6	20	1.601	18	18	R	F	1	Psyc	1	20	1.3875	4	6	2	5	3	0.4	0.363636	0.545455	0.2	0.5	0.3	16.5972	51.8472	35.25
3	84	91	angular	0	3	10	1.337	23	18	R	F	1	Psyc	1	20	1.3875	4	6	2	5	3	0.4	0.363636	0.545455	0.2	0.5	0.3	16.5972	51.8472	35.25
3	85	103	curved	1	6	20	0.681	47	18	R	F	1	Psyc	1	20	1.3875	4	6	2	5	3	0.4	0.363636	0.545455	0.2	0.5	0.3	16.5972	51.8472	35.25
3	86	106	curved	1	9	30	1.153	38	18	R	F	1	Psyc	1	20	1.3875	4	6	2	5	3	0.4	0.363636	0.545455	0.2	0.5	0.3	16.5972	51.8472	35.25
3	87	93	angular	0	5	10	0.749	29	18	R	F	1	Psyc	1	20	1.3875	4	6	2	5	3	0.4	0.363636	0.545455	0.2	0.5	0.3	16.5972	51.8472	35.25
3	88	65	curved	1	4	10	0.816	64	18	R	F	1	Psyc	1	20	1.3875	4	6	2	5	3	0.4	0.363636	0.545455	0.2	0.5	0.3	16.5972	51.8472	35.25
3	89	30	curved	1	5	10	1.218	68	18	R	F	1	Psyc	1	20	1.3875	4	6	2	5	3	0.4	0.363636	0.545455	0.2	0.5	0.3	16.5972	51.8472	35.25
3	90	53	curved	1	12	30	1.216	35	18	R	F	1	Psyc	1	20	1.3875	4	6	2	5	3	0.4	0.363636	0.545455	0.2	0.5	0.3	16.5972	51.8472	35.25
3	91	76	angular	0	6	20	0.681	17	18	R	F	1	Psyc	1	20	1.3875	4	6	2	5	3	0.4	0.363636	0.545455	0.2	0.5	0.3	16.5972	51.8472	35.25
3	92	67	curved	1	6	20	1.366	51	18	R	F	1	Psyc	1	20	1.3875	4	6	2	5	3	0.4	0.363636	0.545455	0.2	0.5	0.3	16.5972	51.8472	35.25
3	93	4	angular	0	6	20	0.749	16	18	R	F	1	Psyc	1	20	1.3875	4	6	2	5	3	0.4	0.363636	0.545455	0.2	0.5	0.3	16.5972	51.8472	35.25
3	94	20	angular	0	4	10	0.434	29	18	R	F	1	Psyc	1	20	1.3875	4	6	2	5	3	0.4	0.363636	0.545455	0.2	0.5	0.3	16.5972	51.8472	35.25
3	95	5	angular	0	8	20	0.616	7	18	R	F	1	Psyc	1	20	1.3875	4	6	2	5	3	0.4	0.363636	0.545455	0.2	0.5	0.3	16.5972	51.8472	35.25
3	96	135	angular	0	15	30	1.002	3	18	R	F	1	Psyc	1	20	1.3875	4	6	2	5	3	0.4	0.363636	0.545455	0.2	0.5	0.3	16.5972	51.8472	35.25
3	97	113	angular	0	8	20	0.415	3	18	R	F	1	Psyc	1	20	1.3875	4	6	2	5	3	0.4	0.363636	0.545455	0.2	0.5	0.3	16.5972	51.8472	35.25
3	98	59	angular	0	8	20	2.387	2	18	R	F	1	Psyc	1	20	1.3875	4	6	2	5	3	0.4	0.363636	0.545455	0.2	0.5	0.3	16.5972	51.8472	35.25
3	99	45	angular	0	15	30	2.89	5	18	R	F	1	Psyc	1	20	1.3875	4	6	2	5	3	0.4	0.363636	0.545455	0.2	0.5	0.3	16.5972	51.8472	35.25
3	100	108	curved	1	15	30	0.666	25	18	R	F	1	Psyc	1	20	1.3875	4	6	2	5	3	0.4	0.363636	0.545455	0.2	0.5	0.3	16.5972	51.8472	35.25
3	101	137	curved	1	4	10	0.697	71	18	R	F	1	Psyc	1	20	1.3875	4	6	2	5	3	0.4	0.363636	0.545455	0.2	0.5	0.3	16.5972	51.8472	35.25
3	102	27	angular	0	15	30	1.167	8	18	R	F	1	Psyc	1	20	1.3875	4	6	2	5	3	0.4	0.363636	0.545455	0.2	0.5	0.3	16.5972	51.8472	35.25
3	103	139	curved	1	6	20	0.781	35	18	R	F	1	Psyc	1	20	1.3875	4	6	2	5	3	0.4	0.363636	0.545455	0.2	0.5	0.3	16.5972	51.8472	35.25
3	104	110	angular	0	4	10	0.869	22	18	R	F	1	Psyc	1	20	1.3875	4	6	2	5	3	0.4	0.363636	0.545455	0.2	0.5	0.3	16.5972	51.8472	35.25
3	105	1	angular	0	3	10	1.538	22	18	R	F	1	Psyc	1	20	1.3875	4	6	2	5	3	0.4	0.363636	0.545455	0.2	0.5	0.3	16.5972	51.8472	35.25
3	106	40	angular	0	6	20	0.815	6	18	R	F	1	Psyc	1	20	1.3875	4	6	2	5	3	0.4	0.363636	0.545455	0.2	0.5	0.3	16.5972	51.8472	35.25
3	107	2	angular	0	4	10	0.666	15	18	R	F	1	Psyc	1	20	1.3875	4	6	2	5	3	0.4	0.363636	0.545455	0.2	0.5	0.3	16.5972	51.8472	35.25
3	108	134	angular	0	12	30	1.466	5	18	R	F	1	Psyc	1	20	1.3875	4	6	2	5	3	0.4	0.363636	0.545455	0.2	0.5	0.3	16.5972	51.8472	35.25
3	109	83	curved	1	4	10	1.217	62	18	R	F	1	Psyc	1	20	1.3875	4	6	2	5	3	0.4	0.363636	0.545455	0.2	0.5	0.3	16.5972	51.8472	35.25
3	110	24	angular	0	10	20	1.419	17	18	R	F	1	Psyc	1	20	1.3875	4	6	2	5	3	0.4	0.363636	0.545455	0.2	0.5	0.3	16.5972	51.8472	35.25
3	111	51	curved	1	10	20	1.098	56	18	R	F	1	Psyc	1	20	1.3875	4	6	2	5	3	0.4	0.363636	0.545455	0.2	0.5	0.3	16.5972	51.8472	35.25
3	112	69	curved	1	10	20	0.664	40	18	R	F	1	Psyc	1	20	1.3875	4	6	2	5	3	0.4	0.363636	0.545455	0.2	0.5	0.3	16.5972	51.8472	35.25
3	113	81	angular	0	15	30	0.831	4	18	R	F	1	Psyc	1	20	1.3875	4	6	2	5	3	0.4	0.363636	0.545455	0.2	0.5	0.3	16.5972	51.8472	35.25
3	114	17	curved	1	12	30	1.483	36	18	R	F	1	Psyc	1	20	1.3875	4	6	2	5	3	0.4	0.363636	0.545455	0.2	0.5	0.3	16.5972	51.8472	35.25
3	115	52	curved	1	9	30	0.532	46	18	R	F	1	Psyc	1	20	1.3875	4	6	2	5	3	0.4	0.363636	0.545455	0.2	0.5	0.3	16.5972	51.8472	35.25
3	116	62	angular	0	12	30	0.916	4	18	R	F	1	Psyc	1	20	1.3875	4	6	2	5	3	0.4	0.363636	0.545455	0.2	0.5	0.3	16.5972	51.8472	35.25
3	117	116	angular	0	12	30	0.698	14	18	R	F	1	Psyc	1	20	1.3875	4	6	2	5	3	0.4	0.363636	0.545455	0.2	0.5	0.3	16.5972	51.8472	35.25
3	118	140	curved	1	8	20	0.747	42	18	R	F	1	Psyc	1	20	1.3875	4	6	2	5	3	0.4	0.363636	0.545455	0.2	0.5	0.3	16.5972	51.8472	35.25
3	119	56	angular	0	4	10	0.564	38	18	R	F	1	Psyc	1	20	1.3875	4	6	2	5	3	0.4	0.363636	0.545455	0.2	0.5	0.3	16.5972	51.8472	35.25
3	120	82	curved	1	3	10	0.8	72	18	R	F	1	Psyc	1	20	1.3875	4	6	2	5	3	0.4	0.363636	0.545455	0.2	0.5	0.3	16.5972	51.8472	35.25
3	121	26	angular	0	12	30	1.249	2	18	R	F	1	Psyc	1	20	1.3875	4	6	2	5	3	0.4	0.363636	0.545455	0.2	0.5	0.3	16.5972	51.8472	35.25
3	122	119	curved	1	4	10	1.27	84	18	R	F	1	Psyc	1	20	1.3875	4	6	2	5	3	0.4	0.363636	0.545455	0.2	0.5	0.3	16.5972	51.8472	35.25
3	123	35	curved	1	12	30	1.301	50	18	R	F	1	Psyc	1	20	1.3875	4	6	2	5	3	0.4	0.363636	0.545455	0.2	0.5	0.3	16.5972	51.8472	35.25
3	124	32	curved	1	8	20	0.865	37	18	R	F	1	Psyc	1	20	1.3875	4	6	2	5	3	0.4	0.363636	0.545455	0.2	0.5	0.3	16.5972	51.8472	35.25
3	125	23	angular	0	8	20	1.234	8	18	R	F	1	Psyc	1	20	1.3875	4	6	2	5	3	0.4	0.363636	0.545455	0.2	0.5	0.3	16.5972	51.8472	35.25
3	126	141	curved	1	10	20	0.812	25	18	R	F	1	Psyc	1	20	1.3875	4	6	2	5	3	0.4	0.363636	0.545455	0.2	0.5	0.3	16.5972	51.8472	35.25
3	127	127	angular	0	3	10	1.872	18	18	R	F	1	Psyc	1	20	1.3875	4	6	2	5	3	0.4	0.363636	0.545455	0.2	0.5	0.3	16.5972	51.8472	35.25
3	128	88	curved	1	9	30	0.714	41	18	R	F	1	Psyc	1	20	1.3875	4	6	2	5	3	0.4	0.363636	0.545455	0.2	0.5	0.3	16.5972	51.8472	35.25
3	129	120	curved	1	5	10	1.354	88	18	R	F	1	Psyc	1	20	1.3875	4	6	2	5	3	0.4	0.363636	0.545455	0.2	0.5	0.3	16.5972	51.8472	35.25
3	130	73	angular	0	3	10	1.384	28	18	R	F	1	Psyc	1	20	1.3875	4	6	2	5	3	0.4	0.363636	0.545455	0.2	0.5	0.3	16.5972	51.8472	35.25
3	131	144	curved	1	15	30	0.464	13	18	R	F	1	Psyc	1	20	1.3875	4	6	2	5	3	0.4	0.363636	0.545455	0.2	0.5	0.3	16.5972	51.8472	35.25
3	132	98	angular	0	12	30	0.749	7	18	R	F	1	Psyc	1	20	1.3875	4	6	2	5	3	0.4	0.363636	0.545455	0.2	0.5	0.3	16.5972	51.8472	35.25
3	133	130	angular	0	6	20	0.516	3	18	R	F	1	Psyc	1	20	1.3875	4	6	2	5	3	0.4	0.363636	0.545455	0.2	0.5	0.3	16.5972	51.8472	35.25
3	134	14	curved	1	8	20	2	30	18	R	F	1	Psyc	1	20	1.3875	4	6	2	5	3	0.4	0.363636	0.545455	0.2	0.5	0.3	16.5972	51.8472	35.25
3	135	13	curved	1	6	20	0.852	39	18	R	F	1	Psyc	1	20	1.3875	4	6	2	5	3	0.4	0.363636	0.545455	0.2	0.5	0.3	16.5972	51.8472	35.25
3	136	89	curved	1	12	30	0.615	21	18	R	F	1	Psyc	1	20	1.3875	4	6	2	5	3	0.4	0.363636	0.545455	0.2	0.5	0.3	16.5972	51.8472	35.25
3	137	28	curved	1	3	10	0.868	73	18	R	F	1	Psyc	1	20	1.3875	4	6	2	5	3	0.4	0.363636	0.545455	0.2	0.5	0.3	16.5972	51.8472	35.25
3	138	50	curved	1	8	20	1.069	40	18	R	F	1	Psyc	1	20	1.3875	4	6	2	5	3	0.4	0.363636	0.545455	0.2	0.5	0.3	16.5972	51.8472	35.25
3	139	121	curved	1	6	20	0.665	54	18	R	F	1	Psyc	1	20	1.3875	4	6	2	5	3	0.4	0.363636	0.545455	0.2	0.5	0.3	16.5972	51.8472	35.25
3	140	66	curved	1	5	10	1.182	89	18	R	F	1	Psyc	1	20	1.3875	4	6	2	5	3	0.4	0.363636	0.545455	0.2	0.5	0.3	16.5972	51.8472	35.25
3	141	99	angular	0	15	30	1.819	8	18	R	F	1	Psyc	1	20	1.3875	4	6	2	5	3	0.4	0.363636	0.545455	0.2	0.5	0.3	16.5972	51.8472	35.25
3	142	75	angular	0	5	10	0.999	53	18	R	F	1	Psyc	1	20	1.3875	4	6	2	5	3	0.4	0.363636	0.545455	0.2	0.5	0.3	16.5972	51.8472	35.25
3	143	29	curved	1	4	10	1.032	84	18	R	F	1	Psyc	1	20	1.3875	4	6	2	5	3	0.4	0.363636	0.545455	0.2	0.5	0.3	16.5972	51.8472	35.25
3	144	102	curved	1	5	10	0.902	63	18	R	F	1	Psyc	1	20	1.3875	4	6	2	5	3	0.4	0.363636	0.545455	0.2	0.5	0.3	16.5972	51.8472	35.25
4	1	22	angular	0	6	20	1.903	47	19	R	M	0	Psyc	1	3	-15.6125	1	0	1	1	0	0.06	0.0909091	0	0.1	0.1	0	43.3056	74.9583	31.6528
4	2	127	angular	0	3	10	4.146	67	19	R	M	0	Psyc	1	3	-15.6125	1	0	1	1	0	0.06	0.0909091	0	0.1	0.1	0	43.3056	74.9583	31.6528
4	3	56	angular	0	4	10	1.203	73	19	R	M	0	Psyc	1	3	-15.6125	1	0	1	1	0	0.06	0.0909091	0	0.1	0.1	0	43.3056	74.9583	31.6528
4	4	101	curved	1	4	10	2.892	81	19	R	M	0	Psyc	1	3	-15.6125	1	0	1	1	0	0.06	0.0909091	0	0.1	0.1	0	43.3056	74.9583	31.6528
4	5	61	angular	0	9	30	3.089	14	19	R	M	0	Psyc	1	3	-15.6125	1	0	1	1	0	0.06	0.0909091	0	0.1	0.1	0	43.3056	74.9583	31.6528
4	6	117	angular	0	15	30	4.11	10	19	R	M	0	Psyc	1	3	-15.6125	1	0	1	1	0	0.06	0.0909091	0	0.1	0.1	0	43.3056	74.9583	31.6528
4	7	68	curved	1	8	20	2.674	53	19	R	M	0	Psyc	1	3	-15.6125	1	0	1	1	0	0.06	0.0909091	0	0.1	0.1	0	43.3056	74.9583	31.6528
4	8	128	angular	0	4	10	1.134	58	19	R	M	0	Psyc	1	3	-15.6125	1	0	1	1	0	0.06	0.0909091	0	0.1	0.1	0	43.3056	74.9583	31.6528
4	9	60	angular	0	10	20	5.466	47	19	R	M	0	Psyc	1	3	-15.6125	1	0	1	1	0	0.06	0.0909091	0	0.1	0.1	0	43.3056	74.9583	31.6528
4	10	77	angular	0	8	20	1.334	33	19	R	M	0	Psyc	1	3	-15.6125	1	0	1	1	0	0.06	0.0909091	0	0.1	0.1	0	43.3056	74.9583	31.6528
4	11	122	curved	1	8	20	3.728	60	19	R	M	0	Psyc	1	3	-15.6125	1	0	1	1	0	0.06	0.0909091	0	0.1	0.1	0	43.3056	74.9583	31.6528
4	12	82	curved	1	3	10	1.269	91	19	R	M	0	Psyc	1	3	-15.6125	1	0	1	1	0	0.06	0.0909091	0	0.1	0.1	0	43.3056	74.9583	31.6528
4	13	44	angular	0	12	30	1.452	44	19	R	M	0	Psyc	1	3	-15.6125	1	0	1	1	0	0.06	0.0909091	0	0.1	0.1	0	43.3056	74.9583	31.6528
4	14	34	curved	1	9	30	3.79	65	19	R	M	0	Psyc	1	3	-15.6125	1	0	1	1	0	0.06	0.0909091	0	0.1	0.1	0	43.3056	74.9583	31.6528
4	15	97	angular	0	9	30	1.136	36	19	R	M	0	Psyc	1	3	-15.6125	1	0	1	1	0	0.06	0.0909091	0	0.1	0.1	0	43.3056	74.9583	31.6528
4	16	73	angular	0	3	10	1.939	63	19	R	M	0	Psyc	1	3	-15.6125	1	0	1	1	0	0.06	0.0909091	0	0.1	0.1	0	43.3056	74.9583	31.6528
4	17	28	curved	1	3	10	0.948	89	19	R	M	0	Psyc	1	3	-15.6125	1	0	1	1	0	0.06	0.0909091	0	0.1	0.1	0	43.3056	74.9583	31.6528
4	18	75	angular	0	5	10	1.636	84	19	R	M	0	Psyc	1	3	-15.6125	1	0	1	1	0	0.06	0.0909091	0	0.1	0.1	0	43.3056	74.9583	31.6528
4	19	40	angular	0	6	20	2.389	48	19	R	M	0	Psyc	1	3	-15.6125	1	0	1	1	0	0.06	0.0909091	0	0.1	0.1	0	43.3056	74.9583	31.6528
4	20	8	angular	0	12	30	1.771	40	19	R	M	0	Psyc	1	3	-15.6125	1	0	1	1	0	0.06	0.0909091	0	0.1	0.1	0	43.3056	74.9583	31.6528
4	21	24	angular	0	10	20	1.552	46	19	R	M	0	Psyc	1	3	-15.6125	1	0	1	1	0	0.06	0.0909091	0	0.1	0.1	0	43.3056	74.9583	31.6528
4	22	78	angular	0	10	20	5.718	34	19	R	M	0	Psyc	1	3	-15.6125	1	0	1	1	0	0.06	0.0909091	0	0.1	0.1	0	43.3056	74.9583	31.6528
4	23	137	curved	1	4	10	1.417	84	19	R	M	0	Psyc	1	3	-15.6125	1	0	1	1	0	0.06	0.0909091	0	0.1	0.1	0	43.3056	74.9583	31.6528
4	24	125	curved	1	12	30	1.304	56	19	R	M	0	Psyc	1	3	-15.6125	1	0	1	1	0	0.06	0.0909091	0	0.1	0.1	0	43.3056	74.9583	31.6528
4	25	4	angular	0	6	20	1.164	32	19	R	M	0	Psyc	1	3	-15.6125	1	0	1	1	0	0.06	0.0909091	0	0.1	0.1	0	43.3056	74.9583	31.6528
4	26	29	curved	1	4	10	1.284	83	19	R	M	0	Psyc	1	3	-15.6125	1	0	1	1	0	0.06	0.0909091	0	0.1	0.1	0	43.3056	74.9583	31.6528
4	27	16	curved	1	9	30	1.184	67	19	R	M	0	Psyc	1	3	-15.6125	1	0	1	1	0	0.06	0.0909091	0	0.1	0.1	0	43.3056	74.9583	31.6528
4	28	81	angular	0	15	30	1.621	20	19	R	M	0	Psyc	1	3	-15.6125	1	0	1	1	0	0.06	0.0909091	0	0.1	0.1	0	43.3056	74.9583	31.6528
4	29	138	curved	1	5	10	1.702	91	19	R	M	0	Psyc	1	3	-15.6125	1	0	1	1	0	0.06	0.0909091	0	0.1	0.1	0	43.3056	74.9583	31.6528
4	30	71	curved	1	12	30	2.373	43	19	R	M	0	Psyc	1	3	-15.6125	1	0	1	1	0	0.06	0.0909091	0	0.1	0.1	0	43.3056	74.9583	31.6528
4	31	62	angular	0	12	30	2.519	24	19	R	M	0	Psyc	1	3	-15.6125	1	0	1	1	0	0.06	0.0909091	0	0.1	0.1	0	43.3056	74.9583	31.6528
4	32	84	curved	1	5	10	1.567	91	19	R	M	0	Psyc	1	3	-15.6125	1	0	1	1	0	0.06	0.0909091	0	0.1	0.1	0	43.3056	74.9583	31.6528
4	33	52	curved	1	9	30	1.617	76	19	R	M	0	Psyc	1	3	-15.6125	1	0	1	1	0	0.06	0.0909091	0	0.1	0.1	0	43.3056	74.9583	31.6528
4	34	76	angular	0	6	20	1.317	34	19	R	M	0	Psyc	1	3	-15.6125	1	0	1	1	0	0.06	0.0909091	0	0.1	0.1	0	43.3056	74.9583	31.6528
4	35	27	angular	0	15	30	0.919	24	19	R	M	0	Psyc	1	3	-15.6125	1	0	1	1	0	0.06	0.0909091	0	0.1	0.1	0	43.3056	74.9583	31.6528
4	36	142	curved	1	9	30	1.117	55	19	R	M	0	Psyc	1	3	-15.6125	1	0	1	1	0	0.06	0.0909091	0	0.1	0.1	0	43.3056	74.9583	31.6528
4	37	86	curved	1	8	20	1.166	78	19	R	M	0	Psyc	1	3	-15.6125	1	0	1	1	0	0.06	0.0909091	0	0.1	0.1	0	43.3056	74.9583	31.6528
4	38	23	angular	0	8	20	1.552	44	19	R	M	0	Psyc	1	3	-15.6125	1	0	1	1	0	0.06	0.0909091	0	0.1	0.1	0	43.3056	74.9583	31.6528
4	39	139	curved	1	6	20	1.084	73	19	R	M	0	Psyc	1	3	-15.6125	1	0	1	1	0	0.06	0.0909091	0	0.1	0.1	0	43.3056	74.9583	31.6528
4	40	35	curved	1	12	30	3.51	80	19	R	M	0	Psyc	1	3	-15.6125	1	0	1	1	0	0.06	0.0909091	0	0.1	0.1	0	43.3056	74.9583	31.6528
4	41	12	curved	1	5	10	1.001	90	19	R	M	0	Psyc	1	3	-15.6125	1	0	1	1	0	0.06	0.0909091	0	0.1	0.1	0	43.3056	74.9583	31.6528
4	42	113	angular	0	8	20	1.972	34	19	R	M	0	Psyc	1	3	-15.6125	1	0	1	1	0	0.06	0.0909091	0	0.1	0.1	0	43.3056	74.9583	31.6528
4	43	120	curved	1	5	10	2.922	76	19	R	M	0	Psyc	1	3	-15.6125	1	0	1	1	0	0.06	0.0909091	0	0.1	0.1	0	43.3056	74.9583	31.6528
4	44	72	curved	1	15	30	1.036	29	19	R	M	0	Psyc	1	3	-15.6125	1	0	1	1	0	0.06	0.0909091	0	0.1	0.1	0	43.3056	74.9583	31.6528
4	45	99	angular	0	15	30	3.425	25	19	R	M	0	Psyc	1	3	-15.6125	1	0	1	1	0	0.06	0.0909091	0	0.1	0.1	0	43.3056	74.9583	31.6528
4	46	107	curved	1	12	30	2.322	73	19	R	M	0	Psyc	1	3	-15.6125	1	0	1	1	0	0.06	0.0909091	0	0.1	0.1	0	43.3056	74.9583	31.6528
4	47	131	angular	0	8	20	1.351	39	19	R	M	0	Psyc	1	3	-15.6125	1	0	1	1	0	0.06	0.0909091	0	0.1	0.1	0	43.3056	74.9583	31.6528
4	48	45	angular	0	15	30	6.469	44	19	R	M	0	Psyc	1	3	-15.6125	1	0	1	1	0	0.06	0.0909091	0	0.1	0.1	0	43.3056	74.9583	31.6528
4	49	106	curved	1	9	30	1.436	70	19	R	M	0	Psyc	1	3	-15.6125	1	0	1	1	0	0.06	0.0909091	0	0.1	0.1	0	43.3056	74.9583	31.6528
4	50	30	curved	1	5	10	1.15	95	19	R	M	0	Psyc	1	3	-15.6125	1	0	1	1	0	0.06	0.0909091	0	0.1	0.1	0	43.3056	74.9583	31.6528
4	51	18	curved	1	15	30	1.57	76	19	R	M	0	Psyc	1	3	-15.6125	1	0	1	1	0	0.06	0.0909091	0	0.1	0.1	0	43.3056	74.9583	31.6528
4	52	100	curved	1	3	10	7.623	96	19	R	M	0	Psyc	1	3	-15.6125	1	0	1	1	0	0.06	0.0909091	0	0.1	0.1	0	43.3056	74.9583	31.6528
4	53	36	curved	1	15	30	6.016	44	19	R	M	0	Psyc	1	3	-15.6125	1	0	1	1	0	0.06	0.0909091	0	0.1	0.1	0	43.3056	74.9583	31.6528
4	54	85	curved	1	6	20	4.546	68	19	R	M	0	Psyc	1	3	-15.6125	1	0	1	1	0	0.06	0.0909091	0	0.1	0.1	0	43.3056	74.9583	31.6528
4	55	132	angular	0	10	20	3.557	35	19	R	M	0	Psyc	1	3	-15.6125	1	0	1	1	0	0.06	0.0909091	0	0.1	0.1	0	43.3056	74.9583	31.6528
4	56	39	angular	0	5	10	2.654	60	19	R	M	0	Psyc	1	3	-15.6125	1	0	1	1	0	0.06	0.0909091	0	0.1	0.1	0	43.3056	74.9583	31.6528
4	57	119	curved	1	4	10	1.117	81	19	R	M	0	Psyc	1	3	-15.6125	1	0	1	1	0	0.06	0.0909091	0	0.1	0.1	0	43.3056	74.9583	31.6528
4	58	59	angular	0	8	20	1.335	34	19	R	M	0	Psyc	1	3	-15.6125	1	0	1	1	0	0.06	0.0909091	0	0.1	0.1	0	43.3056	74.9583	31.6528
4	59	90	curved	1	15	30	2.472	52	19	R	M	0	Psyc	1	3	-15.6125	1	0	1	1	0	0.06	0.0909091	0	0.1	0.1	0	43.3056	74.9583	31.6528
4	60	53	curved	1	12	30	0.834	58	19	R	M	0	Psyc	1	3	-15.6125	1	0	1	1	0	0.06	0.0909091	0	0.1	0.1	0	43.3056	74.9583	31.6528
4	61	98	angular	0	12	30	0.968	37	19	R	M	0	Psyc	1	3	-15.6125	1	0	1	1	0	0.06	0.0909091	0	0.1	0.1	0	43.3056	74.9583	31.6528
4	62	46	curved	1	3	10	1.382	90	19	R	M	0	Psyc	1	3	-15.6125	1	0	1	1	0	0.06	0.0909091	0	0.1	0.1	0	43.3056	74.9583	31.6528
4	63	108	curved	1	15	30	0.984	74	19	R	M	0	Psyc	1	3	-15.6125	1	0	1	1	0	0.06	0.0909091	0	0.1	0.1	0	43.3056	74.9583	31.6528
4	64	91	angular	0	3	10	1.501	55	19	R	M	0	Psyc	1	3	-15.6125	1	0	1	1	0	0.06	0.0909091	0	0.1	0.1	0	43.3056	74.9583	31.6528
4	65	19	angular	0	3	10	1.353	46	19	R	M	0	Psyc	1	3	-15.6125	1	0	1	1	0	0.06	0.0909091	0	0.1	0.1	0	43.3056	74.9583	31.6528
4	66	69	curved	1	10	20	2.038	72	19	R	M	0	Psyc	1	3	-15.6125	1	0	1	1	0	0.06	0.0909091	0	0.1	0.1	0	43.3056	74.9583	31.6528
4	67	144	curved	1	15	30	2.223	79	19	R	M	0	Psyc	1	3	-15.6125	1	0	1	1	0	0.06	0.0909091	0	0.1	0.1	0	43.3056	74.9583	31.6528
4	68	70	curved	1	9	30	1.466	85	19	R	M	0	Psyc	1	3	-15.6125	1	0	1	1	0	0.06	0.0909091	0	0.1	0.1	0	43.3056	74.9583	31.6528
4	69	57	angular	0	5	10	1.503	36	19	R	M	0	Psyc	1	3	-15.6125	1	0	1	1	0	0.06	0.0909091	0	0.1	0.1	0	43.3056	74.9583	31.6528
4	70	41	angular	0	8	20	1.069	25	19	R	M	0	Psyc	1	3	-15.6125	1	0	1	1	0	0.06	0.0909091	0	0.1	0.1	0	43.3056	74.9583	31.6528
4	71	135	angular	0	15	30	5.032	18	19	R	M	0	Psyc	1	3	-15.6125	1	0	1	1	0	0.06	0.0909091	0	0.1	0.1	0	43.3056	74.9583	31.6528
4	72	114	angular	0	10	20	1.872	33	19	R	M	0	Psyc	1	3	-15.6125	1	0	1	1	0	0.06	0.0909091	0	0.1	0.1	0	43.3056	74.9583	31.6528
4	73	124	curved	1	9	30	1.401	67	19	R	M	0	Psyc	1	3	-15.6125	1	0	1	1	0	0.06	0.0909091	0	0.1	0.1	0	43.3056	74.9583	31.6528
4	74	109	angular	0	3	10	1.354	51	19	R	M	0	Psyc	1	3	-15.6125	1	0	1	1	0	0.06	0.0909091	0	0.1	0.1	0	43.3056	74.9583	31.6528
4	75	88	curved	1	9	30	1.002	57	19	R	M	0	Psyc	1	3	-15.6125	1	0	1	1	0	0.06	0.0909091	0	0.1	0.1	0	43.3056	74.9583	31.6528
4	76	2	angular	0	4	10	1.586	52	19	R	M	0	Psyc	1	3	-15.6125	1	0	1	1	0	0.06	0.0909091	0	0.1	0.1	0	43.3056	74.9583	31.6528
4	77	143	curved	1	12	30	2.274	68	19	R	M	0	Psyc	1	3	-15.6125	1	0	1	1	0	0.06	0.0909091	0	0.1	0.1	0	43.3056	74.9583	31.6528
4	78	136	curved	1	3	10	1.217	83	19	R	M	0	Psyc	1	3	-15.6125	1	0	1	1	0	0.06	0.0909091	0	0.1	0.1	0	43.3056	74.9583	31.6528
4	79	104	curved	1	8	20	2.958	89	19	R	M	0	Psyc	1	3	-15.6125	1	0	1	1	0	0.06	0.0909091	0	0.1	0.1	0	43.3056	74.9583	31.6528
4	80	64	curved	1	3	10	0.852	86	19	R	M	0	Psyc	1	3	-15.6125	1	0	1	1	0	0.06	0.0909091	0	0.1	0.1	0	43.3056	74.9583	31.6528
4	81	83	curved	1	4	10	2.657	93	19	R	M	0	Psyc	1	3	-15.6125	1	0	1	1	0	0.06	0.0909091	0	0.1	0.1	0	43.3056	74.9583	31.6528
4	82	112	angular	0	6	20	1.15	52	19	R	M	0	Psyc	1	3	-15.6125	1	0	1	1	0	0.06	0.0909091	0	0.1	0.1	0	43.3056	74.9583	31.6528
4	83	102	curved	1	5	10	2.623	74	19	R	M	0	Psyc	1	3	-15.6125	1	0	1	1	0	0.06	0.0909091	0	0.1	0.1	0	43.3056	74.9583	31.6528
4	84	58	angular	0	6	20	2.707	23	19	R	M	0	Psyc	1	3	-15.6125	1	0	1	1	0	0.06	0.0909091	0	0.1	0.1	0	43.3056	74.9583	31.6528
4	85	80	angular	0	12	30	11.582	23	19	R	M	0	Psyc	1	3	-15.6125	1	0	1	1	0	0.06	0.0909091	0	0.1	0.1	0	43.3056	74.9583	31.6528
4	86	123	curved	1	10	20	1.135	50	19	R	M	0	Psyc	1	3	-15.6125	1	0	1	1	0	0.06	0.0909091	0	0.1	0.1	0	43.3056	74.9583	31.6528
4	87	25	angular	0	9	30	0.982	30	19	R	M	0	Psyc	1	3	-15.6125	1	0	1	1	0	0.06	0.0909091	0	0.1	0.1	0	43.3056	74.9583	31.6528
4	88	141	curved	1	10	20	1.232	81	19	R	M	0	Psyc	1	3	-15.6125	1	0	1	1	0	0.06	0.0909091	0	0.1	0.1	0	43.3056	74.9583	31.6528
4	89	79	angular	0	9	30	2.423	64	19	R	M	0	Psyc	1	3	-15.6125	1	0	1	1	0	0.06	0.0909091	0	0.1	0.1	0	43.3056	74.9583	31.6528
4	90	134	angular	0	12	30	1.587	31	19	R	M	0	Psyc	1	3	-15.6125	1	0	1	1	0	0.06	0.0909091	0	0.1	0.1	0	43.3056	74.9583	31.6528
4	91	48	curved	1	5	10	1.082	91	19	R	M	0	Psyc	1	3	-15.6125	1	0	1	1	0	0.06	0.0909091	0	0.1	0.1	0	43.3056	74.9583	31.6528
4	92	54	curved	1	15	30	2.27	61	19	R	M	0	Psyc	1	3	-15.6125	1	0	1	1	0	0.06	0.0909091	0	0.1	0.1	0	43.3056	74.9583	31.6528
4	93	15	curved	1	10	20	7.456	87	19	R	M	0	Psyc	1	3	-15.6125	1	0	1	1	0	0.06	0.0909091	0	0.1	0.1	0	43.3056	74.9583	31.6528
4	94	47	curved	1	4	10	1.451	92	19	R	M	0	Psyc	1	3	-15.6125	1	0	1	1	0	0.06	0.0909091	0	0.1	0.1	0	43.3056	74.9583	31.6528
4	95	89	curved	1	12	30	2.254	60	19	R	M	0	Psyc	1	3	-15.6125	1	0	1	1	0	0.06	0.0909091	0	0.1	0.1	0	43.3056	74.9583	31.6528
4	96	129	angular	0	5	10	1.604	86	19	R	M	0	Psyc	1	3	-15.6125	1	0	1	1	0	0.06	0.0909091	0	0.1	0.1	0	43.3056	74.9583	31.6528
4	97	26	angular	0	12	30	1.45	35	19	R	M	0	Psyc	1	3	-15.6125	1	0	1	1	0	0.06	0.0909091	0	0.1	0.1	0	43.3056	74.9583	31.6528
4	98	49	curved	1	6	20	2.037	62	19	R	M	0	Psyc	1	3	-15.6125	1	0	1	1	0	0.06	0.0909091	0	0.1	0.1	0	43.3056	74.9583	31.6528
4	99	42	angular	0	10	20	3.727	43	19	R	M	0	Psyc	1	3	-15.6125	1	0	1	1	0	0.06	0.0909091	0	0.1	0.1	0	43.3056	74.9583	31.6528
4	100	17	curved	1	12	30	3.894	52	19	R	M	0	Psyc	1	3	-15.6125	1	0	1	1	0	0.06	0.0909091	0	0.1	0.1	0	43.3056	74.9583	31.6528
4	101	103	curved	1	6	20	3.007	73	19	R	M	0	Psyc	1	3	-15.6125	1	0	1	1	0	0.06	0.0909091	0	0.1	0.1	0	43.3056	74.9583	31.6528
4	102	3	angular	0	5	10	0.916	81	19	R	M	0	Psyc	1	3	-15.6125	1	0	1	1	0	0.06	0.0909091	0	0.1	0.1	0	43.3056	74.9583	31.6528
4	103	7	angular	0	9	30	2.038	40	19	R	M	0	Psyc	1	3	-15.6125	1	0	1	1	0	0.06	0.0909091	0	0.1	0.1	0	43.3056	74.9583	31.6528
4	104	92	angular	0	4	10	2.19	44	19	R	M	0	Psyc	1	3	-15.6125	1	0	1	1	0	0.06	0.0909091	0	0.1	0.1	0	43.3056	74.9583	31.6528
4	105	116	angular	0	12	30	3.373	49	19	R	M	0	Psyc	1	3	-15.6125	1	0	1	1	0	0.06	0.0909091	0	0.1	0.1	0	43.3056	74.9583	31.6528
4	106	111	angular	0	5	10	0.952	53	19	R	M	0	Psyc	1	3	-15.6125	1	0	1	1	0	0.06	0.0909091	0	0.1	0.1	0	43.3056	74.9583	31.6528
4	107	63	angular	0	15	30	4.28	31	19	R	M	0	Psyc	1	3	-15.6125	1	0	1	1	0	0.06	0.0909091	0	0.1	0.1	0	43.3056	74.9583	31.6528
4	108	1	angular	0	3	10	1.721	44	19	R	M	0	Psyc	1	3	-15.6125	1	0	1	1	0	0.06	0.0909091	0	0.1	0.1	0	43.3056	74.9583	31.6528
4	109	130	angular	0	6	20	1.303	48	19	R	M	0	Psyc	1	3	-15.6125	1	0	1	1	0	0.06	0.0909091	0	0.1	0.1	0	43.3056	74.9583	31.6528
4	110	9	angular	0	15	30	13.924	61	19	R	M	0	Psyc	1	3	-15.6125	1	0	1	1	0	0.06	0.0909091	0	0.1	0.1	0	43.3056	74.9583	31.6528
4	111	74	angular	0	4	10	0.785	65	19	R	M	0	Psyc	1	3	-15.6125	1	0	1	1	0	0.06	0.0909091	0	0.1	0.1	0	43.3056	74.9583	31.6528
4	112	43	angular	0	9	30	1.316	46	19	R	M	0	Psyc	1	3	-15.6125	1	0	1	1	0	0.06	0.0909091	0	0.1	0.1	0	43.3056	74.9583	31.6528
4	113	13	curved	1	6	20	2.871	81	19	R	M	0	Psyc	1	3	-15.6125	1	0	1	1	0	0.06	0.0909091	0	0.1	0.1	0	43.3056	74.9583	31.6528
4	114	115	angular	0	9	30	8.356	43	19	R	M	0	Psyc	1	3	-15.6125	1	0	1	1	0	0.06	0.0909091	0	0.1	0.1	0	43.3056	74.9583	31.6528
4	115	105	curved	1	10	20	1.216	78	19	R	M	0	Psyc	1	3	-15.6125	1	0	1	1	0	0.06	0.0909091	0	0.1	0.1	0	43.3056	74.9583	31.6528
4	116	94	angular	0	6	20	1.485	38	19	R	M	0	Psyc	1	3	-15.6125	1	0	1	1	0	0.06	0.0909091	0	0.1	0.1	0	43.3056	74.9583	31.6528
4	117	20	angular	0	4	10	1.036	49	19	R	M	0	Psyc	1	3	-15.6125	1	0	1	1	0	0.06	0.0909091	0	0.1	0.1	0	43.3056	74.9583	31.6528
4	118	110	angular	0	4	10	1.469	56	19	R	M	0	Psyc	1	3	-15.6125	1	0	1	1	0	0.06	0.0909091	0	0.1	0.1	0	43.3056	74.9583	31.6528
4	119	6	angular	0	10	20	2.94	29	19	R	M	0	Psyc	1	3	-15.6125	1	0	1	1	0	0.06	0.0909091	0	0.1	0.1	0	43.3056	74.9583	31.6528
4	120	5	angular	0	8	20	0.661	39	19	R	M	0	Psyc	1	3	-15.6125	1	0	1	1	0	0.06	0.0909091	0	0.1	0.1	0	43.3056	74.9583	31.6528
4	121	37	angular	0	3	10	3.205	47	19	R	M	0	Psyc	1	3	-15.6125	1	0	1	1	0	0.06	0.0909091	0	0.1	0.1	0	43.3056	74.9583	31.6528
4	122	126	curved	1	15	30	0.898	57	19	R	M	0	Psyc	1	3	-15.6125	1	0	1	1	0	0.06	0.0909091	0	0.1	0.1	0	43.3056	74.9583	31.6528
4	123	11	curved	1	4	10	2.436	82	19	R	M	0	Psyc	1	3	-15.6125	1	0	1	1	0	0.06	0.0909091	0	0.1	0.1	0	43.3056	74.9583	31.6528
4	124	118	curved	1	3	10	1.033	89	19	R	M	0	Psyc	1	3	-15.6125	1	0	1	1	0	0.06	0.0909091	0	0.1	0.1	0	43.3056	74.9583	31.6528
4	125	96	angular	0	10	20	1.904	46	19	R	M	0	Psyc	1	3	-15.6125	1	0	1	1	0	0.06	0.0909091	0	0.1	0.1	0	43.3056	74.9583	31.6528
4	126	38	angular	0	4	10	1.304	56	19	R	M	0	Psyc	1	3	-15.6125	1	0	1	1	0	0.06	0.0909091	0	0.1	0.1	0	43.3056	74.9583	31.6528
4	127	50	curved	1	8	20	1.519	61	19	R	M	0	Psyc	1	3	-15.6125	1	0	1	1	0	0.06	0.0909091	0	0.1	0.1	0	43.3056	74.9583	31.6528
4	128	87	curved	1	10	20	1.066	69	19	R	M	0	Psyc	1	3	-15.6125	1	0	1	1	0	0.06	0.0909091	0	0.1	0.1	0	43.3056	74.9583	31.6528
4	129	133	angular	0	9	30	2.822	16	19	R	M	0	Psyc	1	3	-15.6125	1	0	1	1	0	0.06	0.0909091	0	0.1	0.1	0	43.3056	74.9583	31.6528
4	130	21	angular	0	5	10	0.896	51	19	R	M	0	Psyc	1	3	-15.6125	1	0	1	1	0	0.06	0.0909091	0	0.1	0.1	0	43.3056	74.9583	31.6528
4	131	93	angular	0	5	10	1.132	55	19	R	M	0	Psyc	1	3	-15.6125	1	0	1	1	0	0.06	0.0909091	0	0.1	0.1	0	43.3056	74.9583	31.6528
4	132	140	curved	1	8	20	0.614	68	19	R	M	0	Psyc	1	3	-15.6125	1	0	1	1	0	0.06	0.0909091	0	0.1	0.1	0	43.3056	74.9583	31.6528
4	133	66	curved	1	5	10	0.748	94	19	R	M	0	Psyc	1	3	-15.6125	1	0	1	1	0	0.06	0.0909091	0	0.1	0.1	0	43.3056	74.9583	31.6528
4	134	121	curved	1	6	20	1.418	87	19	R	M	0	Psyc	1	3	-15.6125	1	0	1	1	0	0.06	0.0909091	0	0.1	0.1	0	43.3056	74.9583	31.6528
4	135	67	curved	1	6	20	1.804	86	19	R	M	0	Psyc	1	3	-15.6125	1	0	1	1	0	0.06	0.0909091	0	0.1	0.1	0	43.3056	74.9583	31.6528
4	136	10	curved	1	3	10	0.583	90	19	R	M	0	Psyc	1	3	-15.6125	1	0	1	1	0	0.06	0.0909091	0	0.1	0.1	0	43.3056	74.9583	31.6528
4	137	14	curved	1	8	20	0.5	80	19	R	M	0	Psyc	1	3	-15.6125	1	0	1	1	0	0.06	0.0909091	0	0.1	0.1	0	43.3056	74.9583	31.6528
4	138	65	curved	1	4	10	0.816	89	19	R	M	0	Psyc	1	3	-15.6125	1	0	1	1	0	0.06	0.0909091	0	0.1	0.1	0	43.3056	74.9583	31.6528
4	139	33	curved	1	10	20	0.902	94	19	R	M	0	Psyc	1	3	-15.6125	1	0	1	1	0	0.06	0.0909091	0	0.1	0.1	0	43.3056	74.9583	31.6528
4	140	51	curved	1	10	20	1.634	88	19	R	M	0	Psyc	1	3	-15.6125	1	0	1	1	0	0.06	0.0909091	0	0.1	0.1	0	43.3056	74.9583	31.6528
4	141	32	curved	1	8	20	0.483	79	19	R	M	0	Psyc	1	3	-15.6125	1	0	1	1	0	0.06	0.0909091	0	0.1	0.1	0	43.3056	74.9583	31.6528
4	142	31	curved	1	6	20	0.582	75	19	R	M	0	Psyc	1	3	-15.6125	1	0	1	1	0	0.06	0.0909091	0	0.1	0.1	0	43.3056	74.9583	31.6528
4	143	95	angular	0	8	20	3.543	44	19	R	M	0	Psyc	1	3	-15.6125	1	0	1	1	0	0.06	0.0909091	0	0.1	0.1	0	43.3056	74.9583	31.6528
4	144	55	angular	0	3	10	2.189	54	19	R	M	0	Psyc	1	3	-15.6125	1	0	1	1	0	0.06	0.0909091	0	0.1	0.1	0	43.3056	74.9583	31.6528
5	1	43	angular	0	9	30	0.715	21	19	R	F	1	Psyc	1	15	-3.6125	0	6	4	1	4	0.3	0	0.545455	0.4	0.1	0.4	24.5	61.6528	37.1528
5	2	57	angular	0	5	10	3.29	12	19	R	F	1	Psyc	1	15	-3.6125	0	6	4	1	4	0.3	0	0.545455	0.4	0.1	0.4	24.5	61.6528	37.1528
5	3	97	angular	0	9	30	0.632	3	19	R	F	1	Psyc	1	15	-3.6125	0	6	4	1	4	0.3	0	0.545455	0.4	0.1	0.4	24.5	61.6528	37.1528
5	4	74	angular	0	4	10	0.415	10	19	R	F	1	Psyc	1	15	-3.6125	0	6	4	1	4	0.3	0	0.545455	0.4	0.1	0.4	24.5	61.6528	37.1528
5	5	111	angular	0	5	10	1.386	2	19	R	F	1	Psyc	1	15	-3.6125	0	6	4	1	4	0.3	0	0.545455	0.4	0.1	0.4	24.5	61.6528	37.1528
5	6	96	angular	0	10	20	0.999	16	19	R	F	1	Psyc	1	15	-3.6125	0	6	4	1	4	0.3	0	0.545455	0.4	0.1	0.4	24.5	61.6528	37.1528
5	7	78	angular	0	10	20	0.413	7	19	R	F	1	Psyc	1	15	-3.6125	0	6	4	1	4	0.3	0	0.545455	0.4	0.1	0.4	24.5	61.6528	37.1528
5	8	3	angular	0	5	10	0.918	4	19	R	F	1	Psyc	1	15	-3.6125	0	6	4	1	4	0.3	0	0.545455	0.4	0.1	0.4	24.5	61.6528	37.1528
5	9	31	curved	1	6	20	0.533	85	19	R	F	1	Psyc	1	15	-3.6125	0	6	4	1	4	0.3	0	0.545455	0.4	0.1	0.4	24.5	61.6528	37.1528
5	10	133	angular	0	9	30	0.566	31	19	R	F	1	Psyc	1	15	-3.6125	0	6	4	1	4	0.3	0	0.545455	0.4	0.1	0.4	24.5	61.6528	37.1528
5	11	118	curved	1	3	10	0.432	58	19	R	F	1	Psyc	1	15	-3.6125	0	6	4	1	4	0.3	0	0.545455	0.4	0.1	0.4	24.5	61.6528	37.1528
5	12	95	angular	0	8	20	0.534	37	19	R	F	1	Psyc	1	15	-3.6125	0	6	4	1	4	0.3	0	0.545455	0.4	0.1	0.4	24.5	61.6528	37.1528
5	13	142	curved	1	9	30	2.821	66	19	R	F	1	Psyc	1	15	-3.6125	0	6	4	1	4	0.3	0	0.545455	0.4	0.1	0.4	24.5	61.6528	37.1528
5	14	44	angular	0	12	30	0.513	39	19	R	F	1	Psyc	1	15	-3.6125	0	6	4	1	4	0.3	0	0.545455	0.4	0.1	0.4	24.5	61.6528	37.1528
5	15	18	curved	1	15	30	1.135	27	19	R	F	1	Psyc	1	15	-3.6125	0	6	4	1	4	0.3	0	0.545455	0.4	0.1	0.4	24.5	61.6528	37.1528
5	16	70	curved	1	9	30	2.222	22	19	R	F	1	Psyc	1	15	-3.6125	0	6	4	1	4	0.3	0	0.545455	0.4	0.1	0.4	24.5	61.6528	37.1528
5	17	115	angular	0	9	30	1.805	18	19	R	F	1	Psyc	1	15	-3.6125	0	6	4	1	4	0.3	0	0.545455	0.4	0.1	0.4	24.5	61.6528	37.1528
5	18	79	angular	0	9	30	1.316	38	19	R	F	1	Psyc	1	15	-3.6125	0	6	4	1	4	0.3	0	0.545455	0.4	0.1	0.4	24.5	61.6528	37.1528
5	19	48	curved	1	5	10	1.082	70	19	R	F	1	Psyc	1	15	-3.6125	0	6	4	1	4	0.3	0	0.545455	0.4	0.1	0.4	24.5	61.6528	37.1528
5	20	6	angular	0	10	20	2.523	53	19	R	F	1	Psyc	1	15	-3.6125	0	6	4	1	4	0.3	0	0.545455	0.4	0.1	0.4	24.5	61.6528	37.1528
5	21	38	angular	0	4	10	2.173	38	19	R	F	1	Psyc	1	15	-3.6125	0	6	4	1	4	0.3	0	0.545455	0.4	0.1	0.4	24.5	61.6528	37.1528
5	22	92	angular	0	4	10	0.798	23	19	R	F	1	Psyc	1	15	-3.6125	0	6	4	1	4	0.3	0	0.545455	0.4	0.1	0.4	24.5	61.6528	37.1528
5	23	80	angular	0	12	30	0.414	11	19	R	F	1	Psyc	1	15	-3.6125	0	6	4	1	4	0.3	0	0.545455	0.4	0.1	0.4	24.5	61.6528	37.1528
5	24	49	curved	1	6	20	0.666	65	19	R	F	1	Psyc	1	15	-3.6125	0	6	4	1	4	0.3	0	0.545455	0.4	0.1	0.4	24.5	61.6528	37.1528
5	25	41	angular	0	8	20	0.45	24	19	R	F	1	Psyc	1	15	-3.6125	0	6	4	1	4	0.3	0	0.545455	0.4	0.1	0.4	24.5	61.6528	37.1528
5	26	63	angular	0	15	30	0.967	13	19	R	F	1	Psyc	1	15	-3.6125	0	6	4	1	4	0.3	0	0.545455	0.4	0.1	0.4	24.5	61.6528	37.1528
5	27	22	angular	0	6	20	0.431	49	19	R	F	1	Psyc	1	15	-3.6125	0	6	4	1	4	0.3	0	0.545455	0.4	0.1	0.4	24.5	61.6528	37.1528
5	28	55	angular	0	3	10	1.032	3	19	R	F	1	Psyc	1	15	-3.6125	0	6	4	1	4	0.3	0	0.545455	0.4	0.1	0.4	24.5	61.6528	37.1528
5	29	68	curved	1	8	20	0.467	80	19	R	F	1	Psyc	1	15	-3.6125	0	6	4	1	4	0.3	0	0.545455	0.4	0.1	0.4	24.5	61.6528	37.1528
5	30	105	curved	1	10	20	0.6	73	19	R	F	1	Psyc	1	15	-3.6125	0	6	4	1	4	0.3	0	0.545455	0.4	0.1	0.4	24.5	61.6528	37.1528
5	31	46	curved	1	3	10	0.7	88	19	R	F	1	Psyc	1	15	-3.6125	0	6	4	1	4	0.3	0	0.545455	0.4	0.1	0.4	24.5	61.6528	37.1528
5	32	39	angular	0	5	10	1.853	17	19	R	F	1	Psyc	1	15	-3.6125	0	6	4	1	4	0.3	0	0.545455	0.4	0.1	0.4	24.5	61.6528	37.1528
5	33	107	curved	1	12	30	0.497	9	19	R	F	1	Psyc	1	15	-3.6125	0	6	4	1	4	0.3	0	0.545455	0.4	0.1	0.4	24.5	61.6528	37.1528
5	34	87	curved	1	10	20	0.802	68	19	R	F	1	Psyc	1	15	-3.6125	0	6	4	1	4	0.3	0	0.545455	0.4	0.1	0.4	24.5	61.6528	37.1528
5	35	138	curved	1	5	10	0.584	63	19	R	F	1	Psyc	1	15	-3.6125	0	6	4	1	4	0.3	0	0.545455	0.4	0.1	0.4	24.5	61.6528	37.1528
5	36	126	curved	1	15	30	0.43	81	19	R	F	1	Psyc	1	15	-3.6125	0	6	4	1	4	0.3	0	0.545455	0.4	0.1	0.4	24.5	61.6528	37.1528
5	37	94	angular	0	6	20	0.412	45	19	R	F	1	Psyc	1	15	-3.6125	0	6	4	1	4	0.3	0	0.545455	0.4	0.1	0.4	24.5	61.6528	37.1528
5	38	128	angular	0	4	10	0.412	30	19	R	F	1	Psyc	1	15	-3.6125	0	6	4	1	4	0.3	0	0.545455	0.4	0.1	0.4	24.5	61.6528	37.1528
5	39	101	curved	1	4	10	0.916	74	19	R	F	1	Psyc	1	15	-3.6125	0	6	4	1	4	0.3	0	0.545455	0.4	0.1	0.4	24.5	61.6528	37.1528
5	40	42	angular	0	10	20	0.429	48	19	R	F	1	Psyc	1	15	-3.6125	0	6	4	1	4	0.3	0	0.545455	0.4	0.1	0.4	24.5	61.6528	37.1528
5	41	77	angular	0	8	20	0.882	31	19	R	F	1	Psyc	1	15	-3.6125	0	6	4	1	4	0.3	0	0.545455	0.4	0.1	0.4	24.5	61.6528	37.1528
5	42	131	angular	0	8	20	1.32	31	19	R	F	1	Psyc	1	15	-3.6125	0	6	4	1	4	0.3	0	0.545455	0.4	0.1	0.4	24.5	61.6528	37.1528
5	43	125	curved	1	12	30	0.431	66	19	R	F	1	Psyc	1	15	-3.6125	0	6	4	1	4	0.3	0	0.545455	0.4	0.1	0.4	24.5	61.6528	37.1528
5	44	100	curved	1	3	10	0.517	84	19	R	F	1	Psyc	1	15	-3.6125	0	6	4	1	4	0.3	0	0.545455	0.4	0.1	0.4	24.5	61.6528	37.1528
5	45	90	curved	1	15	30	0.415	75	19	R	F	1	Psyc	1	15	-3.6125	0	6	4	1	4	0.3	0	0.545455	0.4	0.1	0.4	24.5	61.6528	37.1528
5	46	71	curved	1	12	30	1.735	52	19	R	F	1	Psyc	1	15	-3.6125	0	6	4	1	4	0.3	0	0.545455	0.4	0.1	0.4	24.5	61.6528	37.1528
5	47	34	curved	1	9	30	1.785	62	19	R	F	1	Psyc	1	15	-3.6125	0	6	4	1	4	0.3	0	0.545455	0.4	0.1	0.4	24.5	61.6528	37.1528
5	48	12	curved	1	5	10	0.482	92	19	R	F	1	Psyc	1	15	-3.6125	0	6	4	1	4	0.3	0	0.545455	0.4	0.1	0.4	24.5	61.6528	37.1528
5	49	132	angular	0	10	20	2.42	24	19	R	F	1	Psyc	1	15	-3.6125	0	6	4	1	4	0.3	0	0.545455	0.4	0.1	0.4	24.5	61.6528	37.1528
5	50	9	angular	0	15	30	1.151	37	19	R	F	1	Psyc	1	15	-3.6125	0	6	4	1	4	0.3	0	0.545455	0.4	0.1	0.4	24.5	61.6528	37.1528
5	51	104	curved	1	8	20	1.3	45	19	R	F	1	Psyc	1	15	-3.6125	0	6	4	1	4	0.3	0	0.545455	0.4	0.1	0.4	24.5	61.6528	37.1528
5	52	109	angular	0	3	10	2.638	55	19	R	F	1	Psyc	1	15	-3.6125	0	6	4	1	4	0.3	0	0.545455	0.4	0.1	0.4	24.5	61.6528	37.1528
5	53	61	angular	0	9	30	1.77	65	19	R	F	1	Psyc	1	15	-3.6125	0	6	4	1	4	0.3	0	0.545455	0.4	0.1	0.4	24.5	61.6528	37.1528
5	54	37	angular	0	3	10	6.434	40	19	R	F	1	Psyc	1	15	-3.6125	0	6	4	1	4	0.3	0	0.545455	0.4	0.1	0.4	24.5	61.6528	37.1528
5	55	10	curved	1	3	10	1.536	31	19	R	F	1	Psyc	1	15	-3.6125	0	6	4	1	4	0.3	0	0.545455	0.4	0.1	0.4	24.5	61.6528	37.1528
5	56	11	curved	1	4	10	2.173	22	19	R	F	1	Psyc	1	15	-3.6125	0	6	4	1	4	0.3	0	0.545455	0.4	0.1	0.4	24.5	61.6528	37.1528
5	57	7	angular	0	9	30	1.25	13	19	R	F	1	Psyc	1	15	-3.6125	0	6	4	1	4	0.3	0	0.545455	0.4	0.1	0.4	24.5	61.6528	37.1528
5	58	124	curved	1	9	30	1.251	52	19	R	F	1	Psyc	1	15	-3.6125	0	6	4	1	4	0.3	0	0.545455	0.4	0.1	0.4	24.5	61.6528	37.1528
5	59	33	curved	1	10	20	1.25	43	19	R	F	1	Psyc	1	15	-3.6125	0	6	4	1	4	0.3	0	0.545455	0.4	0.1	0.4	24.5	61.6528	37.1528
5	60	123	curved	1	10	20	1.671	36	19	R	F	1	Psyc	1	15	-3.6125	0	6	4	1	4	0.3	0	0.545455	0.4	0.1	0.4	24.5	61.6528	37.1528
5	61	117	angular	0	15	30	4.695	56	19	R	F	1	Psyc	1	15	-3.6125	0	6	4	1	4	0.3	0	0.545455	0.4	0.1	0.4	24.5	61.6528	37.1528
5	62	25	angular	0	9	30	1.353	75	19	R	F	1	Psyc	1	15	-3.6125	0	6	4	1	4	0.3	0	0.545455	0.4	0.1	0.4	24.5	61.6528	37.1528
5	63	54	curved	1	15	30	1.002	90	19	R	F	1	Psyc	1	15	-3.6125	0	6	4	1	4	0.3	0	0.545455	0.4	0.1	0.4	24.5	61.6528	37.1528
5	64	47	curved	1	4	10	0.448	89	19	R	F	1	Psyc	1	15	-3.6125	0	6	4	1	4	0.3	0	0.545455	0.4	0.1	0.4	24.5	61.6528	37.1528
5	65	15	curved	1	10	20	0.409	83	19	R	F	1	Psyc	1	15	-3.6125	0	6	4	1	4	0.3	0	0.545455	0.4	0.1	0.4	24.5	61.6528	37.1528
5	66	114	angular	0	10	20	0.414	12	19	R	F	1	Psyc	1	15	-3.6125	0	6	4	1	4	0.3	0	0.545455	0.4	0.1	0.4	24.5	61.6528	37.1528
5	67	129	angular	0	5	10	0.416	29	19	R	F	1	Psyc	1	15	-3.6125	0	6	4	1	4	0.3	0	0.545455	0.4	0.1	0.4	24.5	61.6528	37.1528
5	68	60	angular	0	10	20	0.413	15	19	R	F	1	Psyc	1	15	-3.6125	0	6	4	1	4	0.3	0	0.545455	0.4	0.1	0.4	24.5	61.6528	37.1528
5	69	122	curved	1	8	20	1.016	52	19	R	F	1	Psyc	1	15	-3.6125	0	6	4	1	4	0.3	0	0.545455	0.4	0.1	0.4	24.5	61.6528	37.1528
5	70	21	angular	0	5	10	0.413	14	19	R	F	1	Psyc	1	15	-3.6125	0	6	4	1	4	0.3	0	0.545455	0.4	0.1	0.4	24.5	61.6528	37.1528
5	71	72	curved	1	15	30	0.416	71	19	R	F	1	Psyc	1	15	-3.6125	0	6	4	1	4	0.3	0	0.545455	0.4	0.1	0.4	24.5	61.6528	37.1528
5	72	86	curved	1	8	20	0.848	61	19	R	F	1	Psyc	1	15	-3.6125	0	6	4	1	4	0.3	0	0.545455	0.4	0.1	0.4	24.5	61.6528	37.1528
5	73	8	angular	0	12	30	0.516	26	19	R	F	1	Psyc	1	15	-3.6125	0	6	4	1	4	0.3	0	0.545455	0.4	0.1	0.4	24.5	61.6528	37.1528
5	74	19	angular	0	3	10	0.683	12	19	R	F	1	Psyc	1	15	-3.6125	0	6	4	1	4	0.3	0	0.545455	0.4	0.1	0.4	24.5	61.6528	37.1528
5	75	143	curved	1	12	30	1.202	72	19	R	F	1	Psyc	1	15	-3.6125	0	6	4	1	4	0.3	0	0.545455	0.4	0.1	0.4	24.5	61.6528	37.1528
5	76	36	curved	1	15	30	0.616	60	19	R	F	1	Psyc	1	15	-3.6125	0	6	4	1	4	0.3	0	0.545455	0.4	0.1	0.4	24.5	61.6528	37.1528
5	77	136	curved	1	3	10	2.389	60	19	R	F	1	Psyc	1	15	-3.6125	0	6	4	1	4	0.3	0	0.545455	0.4	0.1	0.4	24.5	61.6528	37.1528
5	78	85	curved	1	6	20	0.414	50	19	R	F	1	Psyc	1	15	-3.6125	0	6	4	1	4	0.3	0	0.545455	0.4	0.1	0.4	24.5	61.6528	37.1528
5	79	84	curved	1	5	10	0.416	79	19	R	F	1	Psyc	1	15	-3.6125	0	6	4	1	4	0.3	0	0.545455	0.4	0.1	0.4	24.5	61.6528	37.1528
5	80	16	curved	1	9	30	0.714	77	19	R	F	1	Psyc	1	15	-3.6125	0	6	4	1	4	0.3	0	0.545455	0.4	0.1	0.4	24.5	61.6528	37.1528
5	81	58	angular	0	6	20	0.933	23	19	R	F	1	Psyc	1	15	-3.6125	0	6	4	1	4	0.3	0	0.545455	0.4	0.1	0.4	24.5	61.6528	37.1528
5	82	64	curved	1	3	10	0.616	97	19	R	F	1	Psyc	1	15	-3.6125	0	6	4	1	4	0.3	0	0.545455	0.4	0.1	0.4	24.5	61.6528	37.1528
5	83	112	angular	0	6	20	0.532	8	19	R	F	1	Psyc	1	15	-3.6125	0	6	4	1	4	0.3	0	0.545455	0.4	0.1	0.4	24.5	61.6528	37.1528
5	84	91	angular	0	3	10	0.599	1	19	R	F	1	Psyc	1	15	-3.6125	0	6	4	1	4	0.3	0	0.545455	0.4	0.1	0.4	24.5	61.6528	37.1528
5	85	103	curved	1	6	20	0.498	64	19	R	F	1	Psyc	1	15	-3.6125	0	6	4	1	4	0.3	0	0.545455	0.4	0.1	0.4	24.5	61.6528	37.1528
5	86	106	curved	1	9	30	0.5	78	19	R	F	1	Psyc	1	15	-3.6125	0	6	4	1	4	0.3	0	0.545455	0.4	0.1	0.4	24.5	61.6528	37.1528
5	87	93	angular	0	5	10	0.467	19	19	R	F	1	Psyc	1	15	-3.6125	0	6	4	1	4	0.3	0	0.545455	0.4	0.1	0.4	24.5	61.6528	37.1528
5	88	65	curved	1	4	10	0.417	80	19	R	F	1	Psyc	1	15	-3.6125	0	6	4	1	4	0.3	0	0.545455	0.4	0.1	0.4	24.5	61.6528	37.1528
5	89	30	curved	1	5	10	0.902	64	19	R	F	1	Psyc	1	15	-3.6125	0	6	4	1	4	0.3	0	0.545455	0.4	0.1	0.4	24.5	61.6528	37.1528
5	90	53	curved	1	12	30	0.916	76	19	R	F	1	Psyc	1	15	-3.6125	0	6	4	1	4	0.3	0	0.545455	0.4	0.1	0.4	24.5	61.6528	37.1528
5	91	76	angular	0	6	20	0.415	36	19	R	F	1	Psyc	1	15	-3.6125	0	6	4	1	4	0.3	0	0.545455	0.4	0.1	0.4	24.5	61.6528	37.1528
5	92	67	curved	1	6	20	0.416	22	19	R	F	1	Psyc	1	15	-3.6125	0	6	4	1	4	0.3	0	0.545455	0.4	0.1	0.4	24.5	61.6528	37.1528
5	93	4	angular	0	6	20	0.416	9	19	R	F	1	Psyc	1	15	-3.6125	0	6	4	1	4	0.3	0	0.545455	0.4	0.1	0.4	24.5	61.6528	37.1528
5	94	20	angular	0	4	10	0.413	3	19	R	F	1	Psyc	1	15	-3.6125	0	6	4	1	4	0.3	0	0.545455	0.4	0.1	0.4	24.5	61.6528	37.1528
5	95	5	angular	0	8	20	0.983	1	19	R	F	1	Psyc	1	15	-3.6125	0	6	4	1	4	0.3	0	0.545455	0.4	0.1	0.4	24.5	61.6528	37.1528
5	96	135	angular	0	15	30	0.414	1	19	R	F	1	Psyc	1	15	-3.6125	0	6	4	1	4	0.3	0	0.545455	0.4	0.1	0.4	24.5	61.6528	37.1528
5	97	113	angular	0	8	20	0.413	1	19	R	F	1	Psyc	1	15	-3.6125	0	6	4	1	4	0.3	0	0.545455	0.4	0.1	0.4	24.5	61.6528	37.1528
5	98	59	angular	0	8	20	0.768	3	19	R	F	1	Psyc	1	15	-3.6125	0	6	4	1	4	0.3	0	0.545455	0.4	0.1	0.4	24.5	61.6528	37.1528
5	99	45	angular	0	15	30	0.683	13	19	R	F	1	Psyc	1	15	-3.6125	0	6	4	1	4	0.3	0	0.545455	0.4	0.1	0.4	24.5	61.6528	37.1528
5	100	108	curved	1	15	30	0.516	47	19	R	F	1	Psyc	1	15	-3.6125	0	6	4	1	4	0.3	0	0.545455	0.4	0.1	0.4	24.5	61.6528	37.1528
5	101	137	curved	1	4	10	1.632	70	19	R	F	1	Psyc	1	15	-3.6125	0	6	4	1	4	0.3	0	0.545455	0.4	0.1	0.4	24.5	61.6528	37.1528
5	102	27	angular	0	15	30	0.414	22	19	R	F	1	Psyc	1	15	-3.6125	0	6	4	1	4	0.3	0	0.545455	0.4	0.1	0.4	24.5	61.6528	37.1528
5	103	139	curved	1	6	20	0.513	63	19	R	F	1	Psyc	1	15	-3.6125	0	6	4	1	4	0.3	0	0.545455	0.4	0.1	0.4	24.5	61.6528	37.1528
5	104	110	angular	0	4	10	0.414	4	19	R	F	1	Psyc	1	15	-3.6125	0	6	4	1	4	0.3	0	0.545455	0.4	0.1	0.4	24.5	61.6528	37.1528
5	105	1	angular	0	3	10	0.416	2	19	R	F	1	Psyc	1	15	-3.6125	0	6	4	1	4	0.3	0	0.545455	0.4	0.1	0.4	24.5	61.6528	37.1528
5	106	40	angular	0	6	20	0.414	1	19	R	F	1	Psyc	1	15	-3.6125	0	6	4	1	4	0.3	0	0.545455	0.4	0.1	0.4	24.5	61.6528	37.1528
5	107	2	angular	0	4	10	0.868	11	19	R	F	1	Psyc	1	15	-3.6125	0	6	4	1	4	0.3	0	0.545455	0.4	0.1	0.4	24.5	61.6528	37.1528
5	108	134	angular	0	12	30	0.563	48	19	R	F	1	Psyc	1	15	-3.6125	0	6	4	1	4	0.3	0	0.545455	0.4	0.1	0.4	24.5	61.6528	37.1528
5	109	83	curved	1	4	10	0.415	61	19	R	F	1	Psyc	1	15	-3.6125	0	6	4	1	4	0.3	0	0.545455	0.4	0.1	0.4	24.5	61.6528	37.1528
5	110	24	angular	0	10	20	0.48	52	19	R	F	1	Psyc	1	15	-3.6125	0	6	4	1	4	0.3	0	0.545455	0.4	0.1	0.4	24.5	61.6528	37.1528
5	111	51	curved	1	10	20	0.531	41	19	R	F	1	Psyc	1	15	-3.6125	0	6	4	1	4	0.3	0	0.545455	0.4	0.1	0.4	24.5	61.6528	37.1528
5	112	69	curved	1	10	20	0.415	65	19	R	F	1	Psyc	1	15	-3.6125	0	6	4	1	4	0.3	0	0.545455	0.4	0.1	0.4	24.5	61.6528	37.1528
5	113	81	angular	0	15	30	0.616	85	19	R	F	1	Psyc	1	15	-3.6125	0	6	4	1	4	0.3	0	0.545455	0.4	0.1	0.4	24.5	61.6528	37.1528
5	114	17	curved	1	12	30	1.217	64	19	R	F	1	Psyc	1	15	-3.6125	0	6	4	1	4	0.3	0	0.545455	0.4	0.1	0.4	24.5	61.6528	37.1528
5	115	52	curved	1	9	30	0.5	81	19	R	F	1	Psyc	1	15	-3.6125	0	6	4	1	4	0.3	0	0.545455	0.4	0.1	0.4	24.5	61.6528	37.1528
5	116	62	angular	0	12	30	0.595	62	19	R	F	1	Psyc	1	15	-3.6125	0	6	4	1	4	0.3	0	0.545455	0.4	0.1	0.4	24.5	61.6528	37.1528
5	117	116	angular	0	12	30	1.251	30	19	R	F	1	Psyc	1	15	-3.6125	0	6	4	1	4	0.3	0	0.545455	0.4	0.1	0.4	24.5	61.6528	37.1528
5	118	140	curved	1	8	20	1.27	13	19	R	F	1	Psyc	1	15	-3.6125	0	6	4	1	4	0.3	0	0.545455	0.4	0.1	0.4	24.5	61.6528	37.1528
5	119	56	angular	0	4	10	1.585	5	19	R	F	1	Psyc	1	15	-3.6125	0	6	4	1	4	0.3	0	0.545455	0.4	0.1	0.4	24.5	61.6528	37.1528
5	120	82	curved	1	3	10	1.402	36	19	R	F	1	Psyc	1	15	-3.6125	0	6	4	1	4	0.3	0	0.545455	0.4	0.1	0.4	24.5	61.6528	37.1528
5	121	26	angular	0	12	30	4.194	46	19	R	F	1	Psyc	1	15	-3.6125	0	6	4	1	4	0.3	0	0.545455	0.4	0.1	0.4	24.5	61.6528	37.1528
5	122	119	curved	1	4	10	1.219	23	19	R	F	1	Psyc	1	15	-3.6125	0	6	4	1	4	0.3	0	0.545455	0.4	0.1	0.4	24.5	61.6528	37.1528
5	123	35	curved	1	12	30	1.404	10	19	R	F	1	Psyc	1	15	-3.6125	0	6	4	1	4	0.3	0	0.545455	0.4	0.1	0.4	24.5	61.6528	37.1528
5	124	32	curved	1	8	20	1.905	58	19	R	F	1	Psyc	1	15	-3.6125	0	6	4	1	4	0.3	0	0.545455	0.4	0.1	0.4	24.5	61.6528	37.1528
5	125	23	angular	0	8	20	0.833	31	19	R	F	1	Psyc	1	15	-3.6125	0	6	4	1	4	0.3	0	0.545455	0.4	0.1	0.4	24.5	61.6528	37.1528
5	126	141	curved	1	10	20	1.317	51	19	R	F	1	Psyc	1	15	-3.6125	0	6	4	1	4	0.3	0	0.545455	0.4	0.1	0.4	24.5	61.6528	37.1528
5	127	127	angular	0	3	10	1.164	32	19	R	F	1	Psyc	1	15	-3.6125	0	6	4	1	4	0.3	0	0.545455	0.4	0.1	0.4	24.5	61.6528	37.1528
5	128	88	curved	1	9	30	0.449	70	19	R	F	1	Psyc	1	15	-3.6125	0	6	4	1	4	0.3	0	0.545455	0.4	0.1	0.4	24.5	61.6528	37.1528
5	129	120	curved	1	5	10	1.636	87	19	R	F	1	Psyc	1	15	-3.6125	0	6	4	1	4	0.3	0	0.545455	0.4	0.1	0.4	24.5	61.6528	37.1528
5	130	73	angular	0	3	10	0.48	28	19	R	F	1	Psyc	1	15	-3.6125	0	6	4	1	4	0.3	0	0.545455	0.4	0.1	0.4	24.5	61.6528	37.1528
5	131	144	curved	1	15	30	1.253	21	19	R	F	1	Psyc	1	15	-3.6125	0	6	4	1	4	0.3	0	0.545455	0.4	0.1	0.4	24.5	61.6528	37.1528
5	132	98	angular	0	12	30	0.715	13	19	R	F	1	Psyc	1	15	-3.6125	0	6	4	1	4	0.3	0	0.545455	0.4	0.1	0.4	24.5	61.6528	37.1528
5	133	130	angular	0	6	20	0.784	29	19	R	F	1	Psyc	1	15	-3.6125	0	6	4	1	4	0.3	0	0.545455	0.4	0.1	0.4	24.5	61.6528	37.1528
5	134	14	curved	1	8	20	0.416	22	19	R	F	1	Psyc	1	15	-3.6125	0	6	4	1	4	0.3	0	0.545455	0.4	0.1	0.4	24.5	61.6528	37.1528
5	135	13	curved	1	6	20	0.63	66	19	R	F	1	Psyc	1	15	-3.6125	0	6	4	1	4	0.3	0	0.545455	0.4	0.1	0.4	24.5	61.6528	37.1528
5	136	89	curved	1	12	30	0.466	63	19	R	F	1	Psyc	1	15	-3.6125	0	6	4	1	4	0.3	0	0.545455	0.4	0.1	0.4	24.5	61.6528	37.1528
5	137	28	curved	1	3	10	0.414	70	19	R	F	1	Psyc	1	15	-3.6125	0	6	4	1	4	0.3	0	0.545455	0.4	0.1	0.4	24.5	61.6528	37.1528
5	138	50	curved	1	8	20	0.415	55	19	R	F	1	Psyc	1	15	-3.6125	0	6	4	1	4	0.3	0	0.545455	0.4	0.1	0.4	24.5	61.6528	37.1528
5	139	121	curved	1	6	20	0.413	91	19	R	F	1	Psyc	1	15	-3.6125	0	6	4	1	4	0.3	0	0.545455	0.4	0.1	0.4	24.5	61.6528	37.1528
5	140	66	curved	1	5	10	0.579	98	19	R	F	1	Psyc	1	15	-3.6125	0	6	4	1	4	0.3	0	0.545455	0.4	0.1	0.4	24.5	61.6528	37.1528
5	141	99	angular	0	15	30	0.584	16	19	R	F	1	Psyc	1	15	-3.6125	0	6	4	1	4	0.3	0	0.545455	0.4	0.1	0.4	24.5	61.6528	37.1528
5	142	75	angular	0	5	10	0.563	2	19	R	F	1	Psyc	1	15	-3.6125	0	6	4	1	4	0.3	0	0.545455	0.4	0.1	0.4	24.5	61.6528	37.1528
5	143	29	curved	1	4	10	1.199	99	19	R	F	1	Psyc	1	15	-3.6125	0	6	4	1	4	0.3	0	0.545455	0.4	0.1	0.4	24.5	61.6528	37.1528
5	144	102	curved	1	5	10	0.883	100	19	R	F	1	Psyc	1	15	-3.6125	0	6	4	1	4	0.3	0	0.545455	0.4	0.1	0.4	24.5	61.6528	37.1528
6	1	43	angular	0	9	30	1.383	13	22	R	F	1	Psyc	1	15	-3.6125	3	6	4	2	0	0.306122	0.272727	0.6	0.4	0.2	0	30.1667	52	21.8333
6	2	57	angular	0	5	10	4.58	53	22	R	F	1	Psyc	1	15	-3.6125	3	6	4	2	0	0.306122	0.272727	0.6	0.4	0.2	0	30.1667	52	21.8333
6	3	97	angular	0	9	30	3.961	21	22	R	F	1	Psyc	1	15	-3.6125	3	6	4	2	0	0.306122	0.272727	0.6	0.4	0.2	0	30.1667	52	21.8333
6	4	74	angular	0	4	10	2.238	49	22	R	F	1	Psyc	1	15	-3.6125	3	6	4	2	0	0.306122	0.272727	0.6	0.4	0.2	0	30.1667	52	21.8333
6	5	111	angular	0	5	10	1.151	57	22	R	F	1	Psyc	1	15	-3.6125	3	6	4	2	0	0.306122	0.272727	0.6	0.4	0.2	0	30.1667	52	21.8333
6	6	96	angular	0	10	20	2.07	16	22	R	F	1	Psyc	1	15	-3.6125	3	6	4	2	0	0.306122	0.272727	0.6	0.4	0.2	0	30.1667	52	21.8333
6	7	78	angular	0	10	20	3.712	28	22	R	F	1	Psyc	1	15	-3.6125	3	6	4	2	0	0.306122	0.272727	0.6	0.4	0.2	0	30.1667	52	21.8333
6	8	3	angular	0	5	10	1.701	63	22	R	F	1	Psyc	1	15	-3.6125	3	6	4	2	0	0.306122	0.272727	0.6	0.4	0.2	0	30.1667	52	21.8333
6	9	31	curved	1	6	20	3.826	55	22	R	F	1	Psyc	1	15	-3.6125	3	6	4	2	0	0.306122	0.272727	0.6	0.4	0.2	0	30.1667	52	21.8333
6	10	133	angular	0	9	30	3.34	24	22	R	F	1	Psyc	1	15	-3.6125	3	6	4	2	0	0.306122	0.272727	0.6	0.4	0.2	0	30.1667	52	21.8333
6	11	118	curved	1	3	10	7.169	65	22	R	F	1	Psyc	1	15	-3.6125	3	6	4	2	0	0.306122	0.272727	0.6	0.4	0.2	0	30.1667	52	21.8333
6	12	95	angular	0	8	20	3.494	25	22	R	F	1	Psyc	1	15	-3.6125	3	6	4	2	0	0.306122	0.272727	0.6	0.4	0.2	0	30.1667	52	21.8333
6	13	142	curved	1	9	30	1.471	19	22	R	F	1	Psyc	1	15	-3.6125	3	6	4	2	0	0.306122	0.272727	0.6	0.4	0.2	0	30.1667	52	21.8333
6	14	44	angular	0	12	30	3.778	17	22	R	F	1	Psyc	1	15	-3.6125	3	6	4	2	0	0.306122	0.272727	0.6	0.4	0.2	0	30.1667	52	21.8333
6	15	18	curved	1	15	30	5.283	44	22	R	F	1	Psyc	1	15	-3.6125	3	6	4	2	0	0.306122	0.272727	0.6	0.4	0.2	0	30.1667	52	21.8333
6	16	70	curved	1	9	30	1.989	44	22	R	F	1	Psyc	1	15	-3.6125	3	6	4	2	0	0.306122	0.272727	0.6	0.4	0.2	0	30.1667	52	21.8333
6	17	115	angular	0	9	30	2.023	28	22	R	F	1	Psyc	1	15	-3.6125	3	6	4	2	0	0.306122	0.272727	0.6	0.4	0.2	0	30.1667	52	21.8333
6	18	79	angular	0	9	30	3.21	59	22	R	F	1	Psyc	1	15	-3.6125	3	6	4	2	0	0.306122	0.272727	0.6	0.4	0.2	0	30.1667	52	21.8333
6	19	48	curved	1	5	10	1.872	76	22	R	F	1	Psyc	1	15	-3.6125	3	6	4	2	0	0.306122	0.272727	0.6	0.4	0.2	0	30.1667	52	21.8333
6	20	6	angular	0	10	20	3.076	35	22	R	F	1	Psyc	1	15	-3.6125	3	6	4	2	0	0.306122	0.272727	0.6	0.4	0.2	0	30.1667	52	21.8333
6	21	38	angular	0	4	10	3.076	67	22	R	F	1	Psyc	1	15	-3.6125	3	6	4	2	0	0.306122	0.272727	0.6	0.4	0.2	0	30.1667	52	21.8333
6	22	92	angular	0	4	10	1.271	71	22	R	F	1	Psyc	1	15	-3.6125	3	6	4	2	0	0.306122	0.272727	0.6	0.4	0.2	0	30.1667	52	21.8333
6	23	80	angular	0	12	30	2.942	29	22	R	F	1	Psyc	1	15	-3.6125	3	6	4	2	0	0.306122	0.272727	0.6	0.4	0.2	0	30.1667	52	21.8333
6	24	49	curved	1	6	20	4.997	47	22	R	F	1	Psyc	1	15	-3.6125	3	6	4	2	0	0.306122	0.272727	0.6	0.4	0.2	0	30.1667	52	21.8333
6	25	41	angular	0	8	20	9.696	42	22	R	F	1	Psyc	1	15	-3.6125	3	6	4	2	0	0.306122	0.272727	0.6	0.4	0.2	0	30.1667	52	21.8333
6	26	63	angular	0	15	30	3.423	21	22	R	F	1	Psyc	1	15	-3.6125	3	6	4	2	0	0.306122	0.272727	0.6	0.4	0.2	0	30.1667	52	21.8333
6	27	22	angular	0	6	20	1.905	27	22	R	F	1	Psyc	1	15	-3.6125	3	6	4	2	0	0.306122	0.272727	0.6	0.4	0.2	0	30.1667	52	21.8333
6	28	55	angular	0	3	10	1.469	81	22	R	F	1	Psyc	1	15	-3.6125	3	6	4	2	0	0.306122	0.272727	0.6	0.4	0.2	0	30.1667	52	21.8333
6	29	68	curved	1	8	20	1.855	70	22	R	F	1	Psyc	1	15	-3.6125	3	6	4	2	0	0.306122	0.272727	0.6	0.4	0.2	0	30.1667	52	21.8333
6	30	105	curved	1	10	20	4.214	55	22	R	F	1	Psyc	1	15	-3.6125	3	6	4	2	0	0.306122	0.272727	0.6	0.4	0.2	0	30.1667	52	21.8333
6	31	46	curved	1	3	10	1.253	89	22	R	F	1	Psyc	1	15	-3.6125	3	6	4	2	0	0.306122	0.272727	0.6	0.4	0.2	0	30.1667	52	21.8333
6	32	39	angular	0	5	10	0.934	83	22	R	F	1	Psyc	1	15	-3.6125	3	6	4	2	0	0.306122	0.272727	0.6	0.4	0.2	0	30.1667	52	21.8333
6	33	107	curved	1	12	30	1.416	24	22	R	F	1	Psyc	1	15	-3.6125	3	6	4	2	0	0.306122	0.272727	0.6	0.4	0.2	0	30.1667	52	21.8333
6	34	87	curved	1	10	20	5.282	39	22	R	F	1	Psyc	1	15	-3.6125	3	6	4	2	0	0.306122	0.272727	0.6	0.4	0.2	0	30.1667	52	21.8333
6	35	138	curved	1	5	10	1.203	85	22	R	F	1	Psyc	1	15	-3.6125	3	6	4	2	0	0.306122	0.272727	0.6	0.4	0.2	0	30.1667	52	21.8333
6	36	126	curved	1	15	30	1.25	15	22	R	F	1	Psyc	1	15	-3.6125	3	6	4	2	0	0.306122	0.272727	0.6	0.4	0.2	0	30.1667	52	21.8333
6	37	94	angular	0	6	20	1.822	11	22	R	F	1	Psyc	1	15	-3.6125	3	6	4	2	0	0.306122	0.272727	0.6	0.4	0.2	0	30.1667	52	21.8333
6	38	128	angular	0	4	10	1.334	78	22	R	F	1	Psyc	1	15	-3.6125	3	6	4	2	0	0.306122	0.272727	0.6	0.4	0.2	0	30.1667	52	21.8333
6	39	101	curved	1	4	10	2.139	90	22	R	F	1	Psyc	1	15	-3.6125	3	6	4	2	0	0.306122	0.272727	0.6	0.4	0.2	0	30.1667	52	21.8333
6	40	42	angular	0	10	20	1.366	21	22	R	F	1	Psyc	1	15	-3.6125	3	6	4	2	0	0.306122	0.272727	0.6	0.4	0.2	0	30.1667	52	21.8333
6	41	77	angular	0	8	20	1.086	14	22	R	F	1	Psyc	1	15	-3.6125	3	6	4	2	0	0.306122	0.272727	0.6	0.4	0.2	0	30.1667	52	21.8333
6	42	131	angular	0	8	20	3.843	27	22	R	F	1	Psyc	1	15	-3.6125	3	6	4	2	0	0.306122	0.272727	0.6	0.4	0.2	0	30.1667	52	21.8333
6	43	125	curved	1	12	30	1.266	45	22	R	F	1	Psyc	1	15	-3.6125	3	6	4	2	0	0.306122	0.272727	0.6	0.4	0.2	0	30.1667	52	21.8333
6	44	100	curved	1	3	10	1.718	84	22	R	F	1	Psyc	1	15	-3.6125	3	6	4	2	0	0.306122	0.272727	0.6	0.4	0.2	0	30.1667	52	21.8333
6	45	90	curved	1	15	30	2.154	54	22	R	F	1	Psyc	1	15	-3.6125	3	6	4	2	0	0.306122	0.272727	0.6	0.4	0.2	0	30.1667	52	21.8333
6	46	71	curved	1	12	30	1.401	48	22	R	F	1	Psyc	1	15	-3.6125	3	6	4	2	0	0.306122	0.272727	0.6	0.4	0.2	0	30.1667	52	21.8333
6	47	34	curved	1	9	30	0.898	42	22	R	F	1	Psyc	1	15	-3.6125	3	6	4	2	0	0.306122	0.272727	0.6	0.4	0.2	0	30.1667	52	21.8333
6	48	12	curved	1	5	10	1.219	85	22	R	F	1	Psyc	1	15	-3.6125	3	6	4	2	0	0.306122	0.272727	0.6	0.4	0.2	0	30.1667	52	21.8333
6	49	132	angular	0	10	20	1.368	25	22	R	F	1	Psyc	1	15	-3.6125	3	6	4	2	0	0.306122	0.272727	0.6	0.4	0.2	0	30.1667	52	21.8333
6	50	9	angular	0	15	30	1.149	11	22	R	F	1	Psyc	1	15	-3.6125	3	6	4	2	0	0.306122	0.272727	0.6	0.4	0.2	0	30.1667	52	21.8333
6	51	104	curved	1	8	20	0.885	30	22	R	F	1	Psyc	1	15	-3.6125	3	6	4	2	0	0.306122	0.272727	0.6	0.4	0.2	0	30.1667	52	21.8333
6	52	109	angular	0	3	10	2.151	56	22	R	F	1	Psyc	1	15	-3.6125	3	6	4	2	0	0.306122	0.272727	0.6	0.4	0.2	0	30.1667	52	21.8333
6	53	61	angular	0	9	30	1.304	22	22	R	F	1	Psyc	1	15	-3.6125	3	6	4	2	0	0.306122	0.272727	0.6	0.4	0.2	0	30.1667	52	21.8333
6	54	37	angular	0	3	10	1.283	72	22	R	F	1	Psyc	1	15	-3.6125	3	6	4	2	0	0.306122	0.272727	0.6	0.4	0.2	0	30.1667	52	21.8333
6	55	10	curved	1	3	10	4.447	83	22	R	F	1	Psyc	1	15	-3.6125	3	6	4	2	0	0.306122	0.272727	0.6	0.4	0.2	0	30.1667	52	21.8333
6	56	11	curved	1	4	10	1.652	79	22	R	F	1	Psyc	1	15	-3.6125	3	6	4	2	0	0.306122	0.272727	0.6	0.4	0.2	0	30.1667	52	21.8333
6	57	7	angular	0	9	30	2.707	9	22	R	F	1	Psyc	1	15	-3.6125	3	6	4	2	0	0.306122	0.272727	0.6	0.4	0.2	0	30.1667	52	21.8333
6	58	124	curved	1	9	30	4.965	36	22	R	F	1	Psyc	1	15	-3.6125	3	6	4	2	0	0.306122	0.272727	0.6	0.4	0.2	0	30.1667	52	21.8333
6	59	33	curved	1	10	20	1.014	45	22	R	F	1	Psyc	1	15	-3.6125	3	6	4	2	0	0.306122	0.272727	0.6	0.4	0.2	0	30.1667	52	21.8333
6	60	123	curved	1	10	20	1.253	19	22	R	F	1	Psyc	1	15	-3.6125	3	6	4	2	0	0.306122	0.272727	0.6	0.4	0.2	0	30.1667	52	21.8333
6	61	117	angular	0	15	30	2.189	15	22	R	F	1	Psyc	1	15	-3.6125	3	6	4	2	0	0.306122	0.272727	0.6	0.4	0.2	0	30.1667	52	21.8333
6	62	25	angular	0	9	30	1.722	13	22	R	F	1	Psyc	1	15	-3.6125	3	6	4	2	0	0.306122	0.272727	0.6	0.4	0.2	0	30.1667	52	21.8333
6	63	54	curved	1	15	30	2.486	4	22	R	F	1	Psyc	1	15	-3.6125	3	6	4	2	0	0.306122	0.272727	0.6	0.4	0.2	0	30.1667	52	21.8333
6	64	47	curved	1	4	10	1.502	91	22	R	F	1	Psyc	1	15	-3.6125	3	6	4	2	0	0.306122	0.272727	0.6	0.4	0.2	0	30.1667	52	21.8333
6	65	15	curved	1	10	20	4.797	60	22	R	F	1	Psyc	1	15	-3.6125	3	6	4	2	0	0.306122	0.272727	0.6	0.4	0.2	0	30.1667	52	21.8333
6	66	114	angular	0	10	20	5.316	8	22	R	F	1	Psyc	1	15	-3.6125	3	6	4	2	0	0.306122	0.272727	0.6	0.4	0.2	0	30.1667	52	21.8333
6	67	129	angular	0	5	10	8.141	38	22	R	F	1	Psyc	1	15	-3.6125	3	6	4	2	0	0.306122	0.272727	0.6	0.4	0.2	0	30.1667	52	21.8333
6	68	60	angular	0	10	20	2.475	30	22	R	F	1	Psyc	1	15	-3.6125	3	6	4	2	0	0.306122	0.272727	0.6	0.4	0.2	0	30.1667	52	21.8333
6	69	122	curved	1	8	20	2.709	50	22	R	F	1	Psyc	1	15	-3.6125	3	6	4	2	0	0.306122	0.272727	0.6	0.4	0.2	0	30.1667	52	21.8333
6	70	21	angular	0	5	10	1.855	49	22	R	F	1	Psyc	1	15	-3.6125	3	6	4	2	0	0.306122	0.272727	0.6	0.4	0.2	0	30.1667	52	21.8333
6	71	72	curved	1	15	30	1.27	24	22	R	F	1	Psyc	1	15	-3.6125	3	6	4	2	0	0.306122	0.272727	0.6	0.4	0.2	0	30.1667	52	21.8333
6	72	86	curved	1	8	20	1.955	57	22	R	F	1	Psyc	1	15	-3.6125	3	6	4	2	0	0.306122	0.272727	0.6	0.4	0.2	0	30.1667	52	21.8333
6	73	8	angular	0	12	30	1.834	17	22	R	F	1	Psyc	1	15	-3.6125	3	6	4	2	0	0.306122	0.272727	0.6	0.4	0.2	0	30.1667	52	21.8333
6	74	19	angular	0	3	10	1.755	68	22	R	F	1	Psyc	1	15	-3.6125	3	6	4	2	0	0.306122	0.272727	0.6	0.4	0.2	0	30.1667	52	21.8333
6	75	143	curved	1	12	30	1.3	18	22	R	F	1	Psyc	1	15	-3.6125	3	6	4	2	0	0.306122	0.272727	0.6	0.4	0.2	0	30.1667	52	21.8333
6	76	36	curved	1	15	30	1.47	13	22	R	F	1	Psyc	1	15	-3.6125	3	6	4	2	0	0.306122	0.272727	0.6	0.4	0.2	0	30.1667	52	21.8333
6	77	136	curved	1	3	10	1.821	87	22	R	F	1	Psyc	1	15	-3.6125	3	6	4	2	0	0.306122	0.272727	0.6	0.4	0.2	0	30.1667	52	21.8333
6	78	85	curved	1	6	20	1.668	22	22	R	F	1	Psyc	1	15	-3.6125	3	6	4	2	0	0.306122	0.272727	0.6	0.4	0.2	0	30.1667	52	21.8333
6	79	84	curved	1	5	10	2.09	88	22	R	F	1	Psyc	1	15	-3.6125	3	6	4	2	0	0.306122	0.272727	0.6	0.4	0.2	0	30.1667	52	21.8333
6	80	16	curved	1	9	30	4.898	19	22	R	F	1	Psyc	1	15	-3.6125	3	6	4	2	0	0.306122	0.272727	0.6	0.4	0.2	0	30.1667	52	21.8333
6	81	58	angular	0	6	20	1.855	11	22	R	F	1	Psyc	1	15	-3.6125	3	6	4	2	0	0.306122	0.272727	0.6	0.4	0.2	0	30.1667	52	21.8333
6	82	64	curved	1	3	10	1.721	83	22	R	F	1	Psyc	1	15	-3.6125	3	6	4	2	0	0.306122	0.272727	0.6	0.4	0.2	0	30.1667	52	21.8333
6	83	112	angular	0	6	20	3.624	24	22	R	F	1	Psyc	1	15	-3.6125	3	6	4	2	0	0.306122	0.272727	0.6	0.4	0.2	0	30.1667	52	21.8333
6	84	91	angular	0	3	10	3.829	26	22	R	F	1	Psyc	1	15	-3.6125	3	6	4	2	0	0.306122	0.272727	0.6	0.4	0.2	0	30.1667	52	21.8333
6	85	103	curved	1	6	20	1.185	40	22	R	F	1	Psyc	1	15	-3.6125	3	6	4	2	0	0.306122	0.272727	0.6	0.4	0.2	0	30.1667	52	21.8333
6	86	106	curved	1	9	30	2.24	15	22	R	F	1	Psyc	1	15	-3.6125	3	6	4	2	0	0.306122	0.272727	0.6	0.4	0.2	0	30.1667	52	21.8333
6	87	93	angular	0	5	10	2.623	12	22	R	F	1	Psyc	1	15	-3.6125	3	6	4	2	0	0.306122	0.272727	0.6	0.4	0.2	0	30.1667	52	21.8333
6	88	65	curved	1	4	10	5.428	80	22	R	F	1	Psyc	1	15	-3.6125	3	6	4	2	0	0.306122	0.272727	0.6	0.4	0.2	0	30.1667	52	21.8333
6	89	30	curved	1	5	10	0.851	85	22	R	F	1	Psyc	1	15	-3.6125	3	6	4	2	0	0.306122	0.272727	0.6	0.4	0.2	0	30.1667	52	21.8333
6	90	53	curved	1	12	30	1.953	11	22	R	F	1	Psyc	1	15	-3.6125	3	6	4	2	0	0.306122	0.272727	0.6	0.4	0.2	0	30.1667	52	21.8333
6	91	76	angular	0	6	20	2.287	8	22	R	F	1	Psyc	1	15	-3.6125	3	6	4	2	0	0.306122	0.272727	0.6	0.4	0.2	0	30.1667	52	21.8333
6	92	67	curved	1	6	20	1.152	11	22	R	F	1	Psyc	1	15	-3.6125	3	6	4	2	0	0.306122	0.272727	0.6	0.4	0.2	0	30.1667	52	21.8333
6	93	4	angular	0	6	20	4.077	16	22	R	F	1	Psyc	1	15	-3.6125	3	6	4	2	0	0.306122	0.272727	0.6	0.4	0.2	0	30.1667	52	21.8333
6	94	20	angular	0	4	10	2.374	18	22	R	F	1	Psyc	1	15	-3.6125	3	6	4	2	0	0.306122	0.272727	0.6	0.4	0.2	0	30.1667	52	21.8333
6	95	5	angular	0	8	20	3.712	22	22	R	F	1	Psyc	1	15	-3.6125	3	6	4	2	0	0.306122	0.272727	0.6	0.4	0.2	0	30.1667	52	21.8333
6	96	135	angular	0	15	30	2.04	12	22	R	F	1	Psyc	1	15	-3.6125	3	6	4	2	0	0.306122	0.272727	0.6	0.4	0.2	0	30.1667	52	21.8333
6	97	113	angular	0	8	20	1.538	11	22	R	F	1	Psyc	1	15	-3.6125	3	6	4	2	0	0.306122	0.272727	0.6	0.4	0.2	0	30.1667	52	21.8333
6	98	59	angular	0	8	20	3.392	4	22	R	F	1	Psyc	1	15	-3.6125	3	6	4	2	0	0.306122	0.272727	0.6	0.4	0.2	0	30.1667	52	21.8333
6	99	45	angular	0	15	30	1.521	1	22	R	F	1	Psyc	1	15	-3.6125	3	6	4	2	0	0.306122	0.272727	0.6	0.4	0.2	0	30.1667	52	21.8333
6	100	108	curved	1	15	30	1.684	2	22	R	F	1	Psyc	1	15	-3.6125	3	6	4	2	0	0.306122	0.272727	0.6	0.4	0.2	0	30.1667	52	21.8333
6	101	137	curved	1	4	10	3.092	85	22	R	F	1	Psyc	1	15	-3.6125	3	6	4	2	0	0.306122	0.272727	0.6	0.4	0.2	0	30.1667	52	21.8333
6	102	27	angular	0	15	30	1.854	8	22	R	F	1	Psyc	1	15	-3.6125	3	6	4	2	0	0.306122	0.272727	0.6	0.4	0.2	0	30.1667	52	21.8333
6	103	139	curved	1	6	20	6.233	63	22	R	F	1	Psyc	1	15	-3.6125	3	6	4	2	0	0.306122	0.272727	0.6	0.4	0.2	0	30.1667	52	21.8333
6	104	110	angular	0	4	10	2.407	53	22	R	F	1	Psyc	1	15	-3.6125	3	6	4	2	0	0.306122	0.272727	0.6	0.4	0.2	0	30.1667	52	21.8333
6	105	1	angular	0	3	10	2.592	53	22	R	F	1	Psyc	1	15	-3.6125	3	6	4	2	0	0.306122	0.272727	0.6	0.4	0.2	0	30.1667	52	21.8333
6	106	40	angular	0	6	20	1.252	27	22	R	F	1	Psyc	1	15	-3.6125	3	6	4	2	0	0.306122	0.272727	0.6	0.4	0.2	0	30.1667	52	21.8333
6	107	2	angular	0	4	10	0.784	35	22	R	F	1	Psyc	1	15	-3.6125	3	6	4	2	0	0.306122	0.272727	0.6	0.4	0.2	0	30.1667	52	21.8333
6	108	134	angular	0	12	30	1.437	5	22	R	F	1	Psyc	1	15	-3.6125	3	6	4	2	0	0.306122	0.272727	0.6	0.4	0.2	0	30.1667	52	21.8333
6	109	83	curved	1	4	10	1.838	82	22	R	F	1	Psyc	1	15	-3.6125	3	6	4	2	0	0.306122	0.272727	0.6	0.4	0.2	0	30.1667	52	21.8333
6	110	24	angular	0	10	20	2.522	21	22	R	F	1	Psyc	1	15	-3.6125	3	6	4	2	0	0.306122	0.272727	0.6	0.4	0.2	0	30.1667	52	21.8333
6	111	51	curved	1	10	20	0.799	45	22	R	F	1	Psyc	1	15	-3.6125	3	6	4	2	0	0.306122	0.272727	0.6	0.4	0.2	0	30.1667	52	21.8333
6	112	69	curved	1	10	20	1.42	30	22	R	F	1	Psyc	1	15	-3.6125	3	6	4	2	0	0.306122	0.272727	0.6	0.4	0.2	0	30.1667	52	21.8333
6	113	81	angular	0	15	30	1.721	4	22	R	F	1	Psyc	1	15	-3.6125	3	6	4	2	0	0.306122	0.272727	0.6	0.4	0.2	0	30.1667	52	21.8333
6	114	17	curved	1	12	30	1.973	1	22	R	F	1	Psyc	1	15	-3.6125	3	6	4	2	0	0.306122	0.272727	0.6	0.4	0.2	0	30.1667	52	21.8333
6	115	52	curved	1	9	30	1.534	12	22	R	F	1	Psyc	1	15	-3.6125	3	6	4	2	0	0.306122	0.272727	0.6	0.4	0.2	0	30.1667	52	21.8333
6	116	62	angular	0	12	30	2.172	5	22	R	F	1	Psyc	1	15	-3.6125	3	6	4	2	0	0.306122	0.272727	0.6	0.4	0.2	0	30.1667	52	21.8333
6	117	116	angular	0	12	30	2.725	2	22	R	F	1	Psyc	1	15	-3.6125	3	6	4	2	0	0.306122	0.272727	0.6	0.4	0.2	0	30.1667	52	21.8333
6	118	140	curved	1	8	20	1.27	72	22	R	F	1	Psyc	1	15	-3.6125	3	6	4	2	0	0.306122	0.272727	0.6	0.4	0.2	0	30.1667	52	21.8333
6	119	56	angular	0	4	10	4.598	71	22	R	F	1	Psyc	1	15	-3.6125	3	6	4	2	0	0.306122	0.272727	0.6	0.4	0.2	0	30.1667	52	21.8333
6	120	82	curved	1	3	10	1.467	88	22	R	F	1	Psyc	1	15	-3.6125	3	6	4	2	0	0.306122	0.272727	0.6	0.4	0.2	0	30.1667	52	21.8333
6	121	26	angular	0	12	30	1.784	29	22	R	F	1	Psyc	1	15	-3.6125	3	6	4	2	0	0.306122	0.272727	0.6	0.4	0.2	0	30.1667	52	21.8333
6	122	119	curved	1	4	10	2.991	86	22	R	F	1	Psyc	1	15	-3.6125	3	6	4	2	0	0.306122	0.272727	0.6	0.4	0.2	0	30.1667	52	21.8333
6	123	35	curved	1	12	30	1.62	18	22	R	F	1	Psyc	1	15	-3.6125	3	6	4	2	0	0.306122	0.272727	0.6	0.4	0.2	0	30.1667	52	21.8333
6	124	32	curved	1	8	20	3.526	58	22	R	F	1	Psyc	1	15	-3.6125	3	6	4	2	0	0.306122	0.272727	0.6	0.4	0.2	0	30.1667	52	21.8333
6	125	23	angular	0	8	20	1.216	9	22	R	F	1	Psyc	1	15	-3.6125	3	6	4	2	0	0.306122	0.272727	0.6	0.4	0.2	0	30.1667	52	21.8333
6	126	141	curved	1	10	20	1.098	15	22	R	F	1	Psyc	1	15	-3.6125	3	6	4	2	0	0.306122	0.272727	0.6	0.4	0.2	0	30.1667	52	21.8333
6	127	127	angular	0	3	10	1.033	44	22	R	F	1	Psyc	1	15	-3.6125	3	6	4	2	0	0.306122	0.272727	0.6	0.4	0.2	0	30.1667	52	21.8333
6	128	88	curved	1	9	30	4.094	27	22	R	F	1	Psyc	1	15	-3.6125	3	6	4	2	0	0.306122	0.272727	0.6	0.4	0.2	0	30.1667	52	21.8333
6	129	120	curved	1	5	10	1.956	91	22	R	F	1	Psyc	1	15	-3.6125	3	6	4	2	0	0.306122	0.272727	0.6	0.4	0.2	0	30.1667	52	21.8333
6	130	73	angular	0	3	10	1.652	67	22	R	F	1	Psyc	1	15	-3.6125	3	6	4	2	0	0.306122	0.272727	0.6	0.4	0.2	0	30.1667	52	21.8333
6	131	144	curved	1	15	30	4.727	16	22	R	F	1	Psyc	1	15	-3.6125	3	6	4	2	0	0.306122	0.272727	0.6	0.4	0.2	0	30.1667	52	21.8333
6	132	98	angular	0	12	30	1.234	3	22	R	F	1	Psyc	1	15	-3.6125	3	6	4	2	0	0.306122	0.272727	0.6	0.4	0.2	0	30.1667	52	21.8333
6	133	130	angular	0	6	20	1.352	28	22	R	F	1	Psyc	1	15	-3.6125	3	6	4	2	0	0.306122	0.272727	0.6	0.4	0.2	0	30.1667	52	21.8333
6	134	14	curved	1	8	20	1.535	55	22	R	F	1	Psyc	1	15	-3.6125	3	6	4	2	0	0.306122	0.272727	0.6	0.4	0.2	0	30.1667	52	21.8333
6	135	13	curved	1	6	20	2.09	51	22	R	F	1	Psyc	1	15	-3.6125	3	6	4	2	0	0.306122	0.272727	0.6	0.4	0.2	0	30.1667	52	21.8333
6	136	89	curved	1	12	30	1.939	28	22	R	F	1	Psyc	1	15	-3.6125	3	6	4	2	0	0.306122	0.272727	0.6	0.4	0.2	0	30.1667	52	21.8333
6	137	28	curved	1	3	10	1.601	86	22	R	F	1	Psyc	1	15	-3.6125	3	6	4	2	0	0.306122	0.272727	0.6	0.4	0.2	0	30.1667	52	21.8333
6	138	50	curved	1	8	20	1.638	64	22	R	F	1	Psyc	1	15	-3.6125	3	6	4	2	0	0.306122	0.272727	0.6	0.4	0.2	0	30.1667	52	21.8333
6	139	121	curved	1	6	20	2.437	76	22	R	F	1	Psyc	1	15	-3.6125	3	6	4	2	0	0.306122	0.272727	0.6	0.4	0.2	0	30.1667	52	21.8333
6	140	66	curved	1	5	10	2.707	93	22	R	F	1	Psyc	1	15	-3.6125	3	6	4	2	0	0.306122	0.272727	0.6	0.4	0.2	0	30.1667	52	21.8333
6	141	99	angular	0	15	30	1.486	13	22	R	F	1	Psyc	1	15	-3.6125	3	6	4	2	0	0.306122	0.272727	0.6	0.4	0.2	0	30.1667	52	21.8333
6	142	75	angular	0	5	10	4.729	37	22	R	F	1	Psyc	1	15	-3.6125	3	6	4	2	0	0.306122	0.272727	0.6	0.4	0.2	0	30.1667	52	21.8333
6	143	29	curved	1	4	10	2.052	89	22	R	F	1	Psyc	1	15	-3.6125	3	6	4	2	0	0.306122	0.272727	0.6	0.4	0.2	0	30.1667	52	21.8333
6	144	102	curved	1	5	10	1.37	86	22	R	F	1	Psyc	1	15	-3.6125	3	6	4	2	0	0.306122	0.272727	0.6	0.4	0.2	0	30.1667	52	21.8333
7	1	22	angular	0	6	20	2.84	10	18	R	F	1	Psyc	1	10	-8.6125	2	4	3	1	0	0.2	0.181818	0.363636	0.3	0.1	0	17.0278	44.3472	27.3194
7	2	127	angular	0	3	10	4.111	14	18	R	F	1	Psyc	1	10	-8.6125	2	4	3	1	0	0.2	0.181818	0.363636	0.3	0.1	0	17.0278	44.3472	27.3194
7	3	56	angular	0	4	10	2.641	17	18	R	F	1	Psyc	1	10	-8.6125	2	4	3	1	0	0.2	0.181818	0.363636	0.3	0.1	0	17.0278	44.3472	27.3194
7	4	101	curved	1	4	10	1.583	27	18	R	F	1	Psyc	1	10	-8.6125	2	4	3	1	0	0.2	0.181818	0.363636	0.3	0.1	0	17.0278	44.3472	27.3194
7	5	61	angular	0	9	30	1.387	18	18	R	F	1	Psyc	1	10	-8.6125	2	4	3	1	0	0.2	0.181818	0.363636	0.3	0.1	0	17.0278	44.3472	27.3194
7	6	117	angular	0	15	30	1.553	12	18	R	F	1	Psyc	1	10	-8.6125	2	4	3	1	0	0.2	0.181818	0.363636	0.3	0.1	0	17.0278	44.3472	27.3194
7	7	68	curved	1	8	20	4.33	34	18	R	F	1	Psyc	1	10	-8.6125	2	4	3	1	0	0.2	0.181818	0.363636	0.3	0.1	0	17.0278	44.3472	27.3194
7	8	128	angular	0	4	10	3.156	22	18	R	F	1	Psyc	1	10	-8.6125	2	4	3	1	0	0.2	0.181818	0.363636	0.3	0.1	0	17.0278	44.3472	27.3194
7	9	60	angular	0	10	20	2.02	18	18	R	F	1	Psyc	1	10	-8.6125	2	4	3	1	0	0.2	0.181818	0.363636	0.3	0.1	0	17.0278	44.3472	27.3194
7	10	77	angular	0	8	20	6.32	13	18	R	F	1	Psyc	1	10	-8.6125	2	4	3	1	0	0.2	0.181818	0.363636	0.3	0.1	0	17.0278	44.3472	27.3194
7	11	122	curved	1	8	20	2.322	10	18	R	F	1	Psyc	1	10	-8.6125	2	4	3	1	0	0.2	0.181818	0.363636	0.3	0.1	0	17.0278	44.3472	27.3194
7	12	82	curved	1	3	10	2.19	38	18	R	F	1	Psyc	1	10	-8.6125	2	4	3	1	0	0.2	0.181818	0.363636	0.3	0.1	0	17.0278	44.3472	27.3194
7	13	44	angular	0	12	30	2.174	6	18	R	F	1	Psyc	1	10	-8.6125	2	4	3	1	0	0.2	0.181818	0.363636	0.3	0.1	0	17.0278	44.3472	27.3194
7	14	34	curved	1	9	30	1.535	14	18	R	F	1	Psyc	1	10	-8.6125	2	4	3	1	0	0.2	0.181818	0.363636	0.3	0.1	0	17.0278	44.3472	27.3194
7	15	97	angular	0	9	30	1.469	10	18	R	F	1	Psyc	1	10	-8.6125	2	4	3	1	0	0.2	0.181818	0.363636	0.3	0.1	0	17.0278	44.3472	27.3194
7	16	73	angular	0	3	10	2.123	18	18	R	F	1	Psyc	1	10	-8.6125	2	4	3	1	0	0.2	0.181818	0.363636	0.3	0.1	0	17.0278	44.3472	27.3194
7	17	28	curved	1	3	10	1.704	35	18	R	F	1	Psyc	1	10	-8.6125	2	4	3	1	0	0.2	0.181818	0.363636	0.3	0.1	0	17.0278	44.3472	27.3194
7	18	75	angular	0	5	10	1.7	45	18	R	F	1	Psyc	1	10	-8.6125	2	4	3	1	0	0.2	0.181818	0.363636	0.3	0.1	0	17.0278	44.3472	27.3194
7	19	40	angular	0	6	20	1.3	22	18	R	F	1	Psyc	1	10	-8.6125	2	4	3	1	0	0.2	0.181818	0.363636	0.3	0.1	0	17.0278	44.3472	27.3194
7	20	8	angular	0	12	30	1.887	14	18	R	F	1	Psyc	1	10	-8.6125	2	4	3	1	0	0.2	0.181818	0.363636	0.3	0.1	0	17.0278	44.3472	27.3194
7	21	24	angular	0	10	20	1.22	14	18	R	F	1	Psyc	1	10	-8.6125	2	4	3	1	0	0.2	0.181818	0.363636	0.3	0.1	0	17.0278	44.3472	27.3194
7	22	78	angular	0	10	20	0.85	9	18	R	F	1	Psyc	1	10	-8.6125	2	4	3	1	0	0.2	0.181818	0.363636	0.3	0.1	0	17.0278	44.3472	27.3194
7	23	137	curved	1	4	10	1.651	41	18	R	F	1	Psyc	1	10	-8.6125	2	4	3	1	0	0.2	0.181818	0.363636	0.3	0.1	0	17.0278	44.3472	27.3194
7	24	125	curved	1	12	30	1.187	48	18	R	F	1	Psyc	1	10	-8.6125	2	4	3	1	0	0.2	0.181818	0.363636	0.3	0.1	0	17.0278	44.3472	27.3194
7	25	4	angular	0	6	20	1.652	25	18	R	F	1	Psyc	1	10	-8.6125	2	4	3	1	0	0.2	0.181818	0.363636	0.3	0.1	0	17.0278	44.3472	27.3194
7	26	29	curved	1	4	10	1.187	44	18	R	F	1	Psyc	1	10	-8.6125	2	4	3	1	0	0.2	0.181818	0.363636	0.3	0.1	0	17.0278	44.3472	27.3194
7	27	16	curved	1	9	30	2.056	36	18	R	F	1	Psyc	1	10	-8.6125	2	4	3	1	0	0.2	0.181818	0.363636	0.3	0.1	0	17.0278	44.3472	27.3194
7	28	81	angular	0	15	30	1.07	22	18	R	F	1	Psyc	1	10	-8.6125	2	4	3	1	0	0.2	0.181818	0.363636	0.3	0.1	0	17.0278	44.3472	27.3194
7	29	138	curved	1	5	10	1.872	40	18	R	F	1	Psyc	1	10	-8.6125	2	4	3	1	0	0.2	0.181818	0.363636	0.3	0.1	0	17.0278	44.3472	27.3194
7	30	71	curved	1	12	30	1.22	43	18	R	F	1	Psyc	1	10	-8.6125	2	4	3	1	0	0.2	0.181818	0.363636	0.3	0.1	0	17.0278	44.3472	27.3194
7	31	62	angular	0	12	30	1.053	18	18	R	F	1	Psyc	1	10	-8.6125	2	4	3	1	0	0.2	0.181818	0.363636	0.3	0.1	0	17.0278	44.3472	27.3194
7	32	84	curved	1	5	10	1.386	41	18	R	F	1	Psyc	1	10	-8.6125	2	4	3	1	0	0.2	0.181818	0.363636	0.3	0.1	0	17.0278	44.3472	27.3194
7	33	52	curved	1	9	30	2.675	58	18	R	F	1	Psyc	1	10	-8.6125	2	4	3	1	0	0.2	0.181818	0.363636	0.3	0.1	0	17.0278	44.3472	27.3194
7	34	76	angular	0	6	20	1.536	20	18	R	F	1	Psyc	1	10	-8.6125	2	4	3	1	0	0.2	0.181818	0.363636	0.3	0.1	0	17.0278	44.3472	27.3194
7	35	27	angular	0	15	30	3.576	13	18	R	F	1	Psyc	1	10	-8.6125	2	4	3	1	0	0.2	0.181818	0.363636	0.3	0.1	0	17.0278	44.3472	27.3194
7	36	142	curved	1	9	30	1.053	28	18	R	F	1	Psyc	1	10	-8.6125	2	4	3	1	0	0.2	0.181818	0.363636	0.3	0.1	0	17.0278	44.3472	27.3194
7	37	86	curved	1	8	20	1.822	36	18	R	F	1	Psyc	1	10	-8.6125	2	4	3	1	0	0.2	0.181818	0.363636	0.3	0.1	0	17.0278	44.3472	27.3194
7	38	23	angular	0	8	20	1.721	16	18	R	F	1	Psyc	1	10	-8.6125	2	4	3	1	0	0.2	0.181818	0.363636	0.3	0.1	0	17.0278	44.3472	27.3194
7	39	139	curved	1	6	20	1.203	31	18	R	F	1	Psyc	1	10	-8.6125	2	4	3	1	0	0.2	0.181818	0.363636	0.3	0.1	0	17.0278	44.3472	27.3194
7	40	35	curved	1	12	30	1.82	39	18	R	F	1	Psyc	1	10	-8.6125	2	4	3	1	0	0.2	0.181818	0.363636	0.3	0.1	0	17.0278	44.3472	27.3194
7	41	12	curved	1	5	10	1.134	48	18	R	F	1	Psyc	1	10	-8.6125	2	4	3	1	0	0.2	0.181818	0.363636	0.3	0.1	0	17.0278	44.3472	27.3194
7	42	113	angular	0	8	20	0.985	31	18	R	F	1	Psyc	1	10	-8.6125	2	4	3	1	0	0.2	0.181818	0.363636	0.3	0.1	0	17.0278	44.3472	27.3194
7	43	120	curved	1	5	10	1.586	54	18	R	F	1	Psyc	1	10	-8.6125	2	4	3	1	0	0.2	0.181818	0.363636	0.3	0.1	0	17.0278	44.3472	27.3194
7	44	72	curved	1	15	30	1.036	36	18	R	F	1	Psyc	1	10	-8.6125	2	4	3	1	0	0.2	0.181818	0.363636	0.3	0.1	0	17.0278	44.3472	27.3194
7	45	99	angular	0	15	30	1.234	20	18	R	F	1	Psyc	1	10	-8.6125	2	4	3	1	0	0.2	0.181818	0.363636	0.3	0.1	0	17.0278	44.3472	27.3194
7	46	107	curved	1	12	30	2.224	25	18	R	F	1	Psyc	1	10	-8.6125	2	4	3	1	0	0.2	0.181818	0.363636	0.3	0.1	0	17.0278	44.3472	27.3194
7	47	131	angular	0	8	20	1.634	9	18	R	F	1	Psyc	1	10	-8.6125	2	4	3	1	0	0.2	0.181818	0.363636	0.3	0.1	0	17.0278	44.3472	27.3194
7	48	45	angular	0	15	30	1.253	4	18	R	F	1	Psyc	1	10	-8.6125	2	4	3	1	0	0.2	0.181818	0.363636	0.3	0.1	0	17.0278	44.3472	27.3194
7	49	106	curved	1	9	30	1.233	33	18	R	F	1	Psyc	1	10	-8.6125	2	4	3	1	0	0.2	0.181818	0.363636	0.3	0.1	0	17.0278	44.3472	27.3194
7	50	30	curved	1	5	10	1.066	46	18	R	F	1	Psyc	1	10	-8.6125	2	4	3	1	0	0.2	0.181818	0.363636	0.3	0.1	0	17.0278	44.3472	27.3194
7	51	18	curved	1	15	30	2.239	31	18	R	F	1	Psyc	1	10	-8.6125	2	4	3	1	0	0.2	0.181818	0.363636	0.3	0.1	0	17.0278	44.3472	27.3194
7	52	100	curved	1	3	10	1.371	44	18	R	F	1	Psyc	1	10	-8.6125	2	4	3	1	0	0.2	0.181818	0.363636	0.3	0.1	0	17.0278	44.3472	27.3194
7	53	36	curved	1	15	30	3.109	49	18	R	F	1	Psyc	1	10	-8.6125	2	4	3	1	0	0.2	0.181818	0.363636	0.3	0.1	0	17.0278	44.3472	27.3194
7	54	85	curved	1	6	20	2.507	42	18	R	F	1	Psyc	1	10	-8.6125	2	4	3	1	0	0.2	0.181818	0.363636	0.3	0.1	0	17.0278	44.3472	27.3194
7	55	132	angular	0	10	20	1.621	22	18	R	F	1	Psyc	1	10	-8.6125	2	4	3	1	0	0.2	0.181818	0.363636	0.3	0.1	0	17.0278	44.3472	27.3194
7	56	39	angular	0	5	10	0.882	14	18	R	F	1	Psyc	1	10	-8.6125	2	4	3	1	0	0.2	0.181818	0.363636	0.3	0.1	0	17.0278	44.3472	27.3194
7	57	119	curved	1	4	10	2.687	46	18	R	F	1	Psyc	1	10	-8.6125	2	4	3	1	0	0.2	0.181818	0.363636	0.3	0.1	0	17.0278	44.3472	27.3194
7	58	59	angular	0	8	20	0.952	29	18	R	F	1	Psyc	1	10	-8.6125	2	4	3	1	0	0.2	0.181818	0.363636	0.3	0.1	0	17.0278	44.3472	27.3194
7	59	90	curved	1	15	30	1.354	39	18	R	F	1	Psyc	1	10	-8.6125	2	4	3	1	0	0.2	0.181818	0.363636	0.3	0.1	0	17.0278	44.3472	27.3194
7	60	53	curved	1	12	30	2.022	46	18	R	F	1	Psyc	1	10	-8.6125	2	4	3	1	0	0.2	0.181818	0.363636	0.3	0.1	0	17.0278	44.3472	27.3194
7	61	98	angular	0	12	30	1.07	22	18	R	F	1	Psyc	1	10	-8.6125	2	4	3	1	0	0.2	0.181818	0.363636	0.3	0.1	0	17.0278	44.3472	27.3194
7	62	46	curved	1	3	10	0.768	39	18	R	F	1	Psyc	1	10	-8.6125	2	4	3	1	0	0.2	0.181818	0.363636	0.3	0.1	0	17.0278	44.3472	27.3194
7	63	108	curved	1	15	30	0.85	46	18	R	F	1	Psyc	1	10	-8.6125	2	4	3	1	0	0.2	0.181818	0.363636	0.3	0.1	0	17.0278	44.3472	27.3194
7	64	91	angular	0	3	10	0.682	24	18	R	F	1	Psyc	1	10	-8.6125	2	4	3	1	0	0.2	0.181818	0.363636	0.3	0.1	0	17.0278	44.3472	27.3194
7	65	19	angular	0	3	10	3.757	16	18	R	F	1	Psyc	1	10	-8.6125	2	4	3	1	0	0.2	0.181818	0.363636	0.3	0.1	0	17.0278	44.3472	27.3194
7	66	69	curved	1	10	20	1.599	26	18	R	F	1	Psyc	1	10	-8.6125	2	4	3	1	0	0.2	0.181818	0.363636	0.3	0.1	0	17.0278	44.3472	27.3194
7	67	144	curved	1	15	30	7.07	39	18	R	F	1	Psyc	1	10	-8.6125	2	4	3	1	0	0.2	0.181818	0.363636	0.3	0.1	0	17.0278	44.3472	27.3194
7	68	70	curved	1	9	30	1.067	47	18	R	F	1	Psyc	1	10	-8.6125	2	4	3	1	0	0.2	0.181818	0.363636	0.3	0.1	0	17.0278	44.3472	27.3194
7	69	57	angular	0	5	10	1.637	21	18	R	F	1	Psyc	1	10	-8.6125	2	4	3	1	0	0.2	0.181818	0.363636	0.3	0.1	0	17.0278	44.3472	27.3194
7	70	41	angular	0	8	20	2.257	10	18	R	F	1	Psyc	1	10	-8.6125	2	4	3	1	0	0.2	0.181818	0.363636	0.3	0.1	0	17.0278	44.3472	27.3194
7	71	135	angular	0	15	30	0.618	10	18	R	F	1	Psyc	1	10	-8.6125	2	4	3	1	0	0.2	0.181818	0.363636	0.3	0.1	0	17.0278	44.3472	27.3194
7	72	114	angular	0	10	20	1.801	15	18	R	F	1	Psyc	1	10	-8.6125	2	4	3	1	0	0.2	0.181818	0.363636	0.3	0.1	0	17.0278	44.3472	27.3194
7	73	124	curved	1	9	30	1.387	33	18	R	F	1	Psyc	1	10	-8.6125	2	4	3	1	0	0.2	0.181818	0.363636	0.3	0.1	0	17.0278	44.3472	27.3194
7	74	109	angular	0	3	10	1.488	19	18	R	F	1	Psyc	1	10	-8.6125	2	4	3	1	0	0.2	0.181818	0.363636	0.3	0.1	0	17.0278	44.3472	27.3194
7	75	88	curved	1	9	30	1.37	35	18	R	F	1	Psyc	1	10	-8.6125	2	4	3	1	0	0.2	0.181818	0.363636	0.3	0.1	0	17.0278	44.3472	27.3194
7	76	2	angular	0	4	10	0.685	24	18	R	F	1	Psyc	1	10	-8.6125	2	4	3	1	0	0.2	0.181818	0.363636	0.3	0.1	0	17.0278	44.3472	27.3194
7	77	143	curved	1	12	30	0.732	31	18	R	F	1	Psyc	1	10	-8.6125	2	4	3	1	0	0.2	0.181818	0.363636	0.3	0.1	0	17.0278	44.3472	27.3194
7	78	136	curved	1	3	10	2.172	48	18	R	F	1	Psyc	1	10	-8.6125	2	4	3	1	0	0.2	0.181818	0.363636	0.3	0.1	0	17.0278	44.3472	27.3194
7	79	104	curved	1	8	20	0.982	64	18	R	F	1	Psyc	1	10	-8.6125	2	4	3	1	0	0.2	0.181818	0.363636	0.3	0.1	0	17.0278	44.3472	27.3194
7	80	64	curved	1	3	10	1.972	54	18	R	F	1	Psyc	1	10	-8.6125	2	4	3	1	0	0.2	0.181818	0.363636	0.3	0.1	0	17.0278	44.3472	27.3194
7	81	83	curved	1	4	10	1.304	63	18	R	F	1	Psyc	1	10	-8.6125	2	4	3	1	0	0.2	0.181818	0.363636	0.3	0.1	0	17.0278	44.3472	27.3194
7	82	112	angular	0	6	20	1.87	16	18	R	F	1	Psyc	1	10	-8.6125	2	4	3	1	0	0.2	0.181818	0.363636	0.3	0.1	0	17.0278	44.3472	27.3194
7	83	102	curved	1	5	10	2.689	51	18	R	F	1	Psyc	1	10	-8.6125	2	4	3	1	0	0.2	0.181818	0.363636	0.3	0.1	0	17.0278	44.3472	27.3194
7	84	58	angular	0	6	20	1.317	27	18	R	F	1	Psyc	1	10	-8.6125	2	4	3	1	0	0.2	0.181818	0.363636	0.3	0.1	0	17.0278	44.3472	27.3194
7	85	80	angular	0	12	30	1.118	19	18	R	F	1	Psyc	1	10	-8.6125	2	4	3	1	0	0.2	0.181818	0.363636	0.3	0.1	0	17.0278	44.3472	27.3194
7	86	123	curved	1	10	20	0.953	31	18	R	F	1	Psyc	1	10	-8.6125	2	4	3	1	0	0.2	0.181818	0.363636	0.3	0.1	0	17.0278	44.3472	27.3194
7	87	25	angular	0	9	30	1.817	13	18	R	F	1	Psyc	1	10	-8.6125	2	4	3	1	0	0.2	0.181818	0.363636	0.3	0.1	0	17.0278	44.3472	27.3194
7	88	141	curved	1	10	20	0.986	11	18	R	F	1	Psyc	1	10	-8.6125	2	4	3	1	0	0.2	0.181818	0.363636	0.3	0.1	0	17.0278	44.3472	27.3194
7	89	79	angular	0	9	30	1.183	5	18	R	F	1	Psyc	1	10	-8.6125	2	4	3	1	0	0.2	0.181818	0.363636	0.3	0.1	0	17.0278	44.3472	27.3194
7	90	134	angular	0	12	30	0.916	1	18	R	F	1	Psyc	1	10	-8.6125	2	4	3	1	0	0.2	0.181818	0.363636	0.3	0.1	0	17.0278	44.3472	27.3194
7	91	48	curved	1	5	10	3.473	58	18	R	F	1	Psyc	1	10	-8.6125	2	4	3	1	0	0.2	0.181818	0.363636	0.3	0.1	0	17.0278	44.3472	27.3194
7	92	54	curved	1	15	30	1.42	45	18	R	F	1	Psyc	1	10	-8.6125	2	4	3	1	0	0.2	0.181818	0.363636	0.3	0.1	0	17.0278	44.3472	27.3194
7	93	15	curved	1	10	20	2.238	40	18	R	F	1	Psyc	1	10	-8.6125	2	4	3	1	0	0.2	0.181818	0.363636	0.3	0.1	0	17.0278	44.3472	27.3194
7	94	47	curved	1	4	10	1.217	60	18	R	F	1	Psyc	1	10	-8.6125	2	4	3	1	0	0.2	0.181818	0.363636	0.3	0.1	0	17.0278	44.3472	27.3194
7	95	89	curved	1	12	30	2.223	69	18	R	F	1	Psyc	1	10	-8.6125	2	4	3	1	0	0.2	0.181818	0.363636	0.3	0.1	0	17.0278	44.3472	27.3194
7	96	129	angular	0	5	10	1.053	62	18	R	F	1	Psyc	1	10	-8.6125	2	4	3	1	0	0.2	0.181818	0.363636	0.3	0.1	0	17.0278	44.3472	27.3194
7	97	26	angular	0	12	30	1.052	26	18	R	F	1	Psyc	1	10	-8.6125	2	4	3	1	0	0.2	0.181818	0.363636	0.3	0.1	0	17.0278	44.3472	27.3194
7	98	49	curved	1	6	20	1.136	36	18	R	F	1	Psyc	1	10	-8.6125	2	4	3	1	0	0.2	0.181818	0.363636	0.3	0.1	0	17.0278	44.3472	27.3194
7	99	42	angular	0	10	20	1.101	12	18	R	F	1	Psyc	1	10	-8.6125	2	4	3	1	0	0.2	0.181818	0.363636	0.3	0.1	0	17.0278	44.3472	27.3194
7	100	17	curved	1	12	30	1.316	22	18	R	F	1	Psyc	1	10	-8.6125	2	4	3	1	0	0.2	0.181818	0.363636	0.3	0.1	0	17.0278	44.3472	27.3194
7	101	103	curved	1	6	20	0.751	46	18	R	F	1	Psyc	1	10	-8.6125	2	4	3	1	0	0.2	0.181818	0.363636	0.3	0.1	0	17.0278	44.3472	27.3194
7	102	3	angular	0	5	10	1.035	29	18	R	F	1	Psyc	1	10	-8.6125	2	4	3	1	0	0.2	0.181818	0.363636	0.3	0.1	0	17.0278	44.3472	27.3194
7	103	7	angular	0	9	30	0.814	12	18	R	F	1	Psyc	1	10	-8.6125	2	4	3	1	0	0.2	0.181818	0.363636	0.3	0.1	0	17.0278	44.3472	27.3194
7	104	92	angular	0	4	10	0.849	4	18	R	F	1	Psyc	1	10	-8.6125	2	4	3	1	0	0.2	0.181818	0.363636	0.3	0.1	0	17.0278	44.3472	27.3194
7	105	116	angular	0	12	30	1.016	2	18	R	F	1	Psyc	1	10	-8.6125	2	4	3	1	0	0.2	0.181818	0.363636	0.3	0.1	0	17.0278	44.3472	27.3194
7	106	111	angular	0	5	10	0.598	16	18	R	F	1	Psyc	1	10	-8.6125	2	4	3	1	0	0.2	0.181818	0.363636	0.3	0.1	0	17.0278	44.3472	27.3194
7	107	63	angular	0	15	30	1.604	20	18	R	F	1	Psyc	1	10	-8.6125	2	4	3	1	0	0.2	0.181818	0.363636	0.3	0.1	0	17.0278	44.3472	27.3194
7	108	1	angular	0	3	10	1.003	20	18	R	F	1	Psyc	1	10	-8.6125	2	4	3	1	0	0.2	0.181818	0.363636	0.3	0.1	0	17.0278	44.3472	27.3194
7	109	130	angular	0	6	20	0.714	16	18	R	F	1	Psyc	1	10	-8.6125	2	4	3	1	0	0.2	0.181818	0.363636	0.3	0.1	0	17.0278	44.3472	27.3194
7	110	9	angular	0	15	30	1.752	10	18	R	F	1	Psyc	1	10	-8.6125	2	4	3	1	0	0.2	0.181818	0.363636	0.3	0.1	0	17.0278	44.3472	27.3194
7	111	74	angular	0	4	10	2.538	7	18	R	F	1	Psyc	1	10	-8.6125	2	4	3	1	0	0.2	0.181818	0.363636	0.3	0.1	0	17.0278	44.3472	27.3194
7	112	43	angular	0	9	30	0.835	16	18	R	F	1	Psyc	1	10	-8.6125	2	4	3	1	0	0.2	0.181818	0.363636	0.3	0.1	0	17.0278	44.3472	27.3194
7	113	13	curved	1	6	20	1.416	42	18	R	F	1	Psyc	1	10	-8.6125	2	4	3	1	0	0.2	0.181818	0.363636	0.3	0.1	0	17.0278	44.3472	27.3194
7	114	115	angular	0	9	30	1.149	23	18	R	F	1	Psyc	1	10	-8.6125	2	4	3	1	0	0.2	0.181818	0.363636	0.3	0.1	0	17.0278	44.3472	27.3194
7	115	105	curved	1	10	20	1.002	38	18	R	F	1	Psyc	1	10	-8.6125	2	4	3	1	0	0.2	0.181818	0.363636	0.3	0.1	0	17.0278	44.3472	27.3194
7	116	94	angular	0	6	20	1.319	13	18	R	F	1	Psyc	1	10	-8.6125	2	4	3	1	0	0.2	0.181818	0.363636	0.3	0.1	0	17.0278	44.3472	27.3194
7	117	20	angular	0	4	10	0.733	7	18	R	F	1	Psyc	1	10	-8.6125	2	4	3	1	0	0.2	0.181818	0.363636	0.3	0.1	0	17.0278	44.3472	27.3194
7	118	110	angular	0	4	10	0.551	7	18	R	F	1	Psyc	1	10	-8.6125	2	4	3	1	0	0.2	0.181818	0.363636	0.3	0.1	0	17.0278	44.3472	27.3194
7	119	6	angular	0	10	20	1.939	17	18	R	F	1	Psyc	1	10	-8.6125	2	4	3	1	0	0.2	0.181818	0.363636	0.3	0.1	0	17.0278	44.3472	27.3194
7	120	5	angular	0	8	20	0.914	6	18	R	F	1	Psyc	1	10	-8.6125	2	4	3	1	0	0.2	0.181818	0.363636	0.3	0.1	0	17.0278	44.3472	27.3194
7	121	37	angular	0	3	10	0.919	15	18	R	F	1	Psyc	1	10	-8.6125	2	4	3	1	0	0.2	0.181818	0.363636	0.3	0.1	0	17.0278	44.3472	27.3194
7	122	126	curved	1	15	30	2.79	48	18	R	F	1	Psyc	1	10	-8.6125	2	4	3	1	0	0.2	0.181818	0.363636	0.3	0.1	0	17.0278	44.3472	27.3194
7	123	11	curved	1	4	10	1.187	44	18	R	F	1	Psyc	1	10	-8.6125	2	4	3	1	0	0.2	0.181818	0.363636	0.3	0.1	0	17.0278	44.3472	27.3194
7	124	118	curved	1	3	10	1.453	50	18	R	F	1	Psyc	1	10	-8.6125	2	4	3	1	0	0.2	0.181818	0.363636	0.3	0.1	0	17.0278	44.3472	27.3194
7	125	96	angular	0	10	20	0.984	28	18	R	F	1	Psyc	1	10	-8.6125	2	4	3	1	0	0.2	0.181818	0.363636	0.3	0.1	0	17.0278	44.3472	27.3194
7	126	38	angular	0	4	10	0.964	19	18	R	F	1	Psyc	1	10	-8.6125	2	4	3	1	0	0.2	0.181818	0.363636	0.3	0.1	0	17.0278	44.3472	27.3194
7	127	50	curved	1	8	20	2.603	38	18	R	F	1	Psyc	1	10	-8.6125	2	4	3	1	0	0.2	0.181818	0.363636	0.3	0.1	0	17.0278	44.3472	27.3194
7	128	87	curved	1	10	20	1.334	61	18	R	F	1	Psyc	1	10	-8.6125	2	4	3	1	0	0.2	0.181818	0.363636	0.3	0.1	0	17.0278	44.3472	27.3194
7	129	133	angular	0	9	30	1.183	23	18	R	F	1	Psyc	1	10	-8.6125	2	4	3	1	0	0.2	0.181818	0.363636	0.3	0.1	0	17.0278	44.3472	27.3194
7	130	21	angular	0	5	10	0.666	15	18	R	F	1	Psyc	1	10	-8.6125	2	4	3	1	0	0.2	0.181818	0.363636	0.3	0.1	0	17.0278	44.3472	27.3194
7	131	93	angular	0	5	10	0.802	15	18	R	F	1	Psyc	1	10	-8.6125	2	4	3	1	0	0.2	0.181818	0.363636	0.3	0.1	0	17.0278	44.3472	27.3194
7	132	140	curved	1	8	20	0.799	33	18	R	F	1	Psyc	1	10	-8.6125	2	4	3	1	0	0.2	0.181818	0.363636	0.3	0.1	0	17.0278	44.3472	27.3194
7	133	66	curved	1	5	10	0.598	49	18	R	F	1	Psyc	1	10	-8.6125	2	4	3	1	0	0.2	0.181818	0.363636	0.3	0.1	0	17.0278	44.3472	27.3194
7	134	121	curved	1	6	20	0.779	62	18	R	F	1	Psyc	1	10	-8.6125	2	4	3	1	0	0.2	0.181818	0.363636	0.3	0.1	0	17.0278	44.3472	27.3194
7	135	67	curved	1	6	20	0.817	74	18	R	F	1	Psyc	1	10	-8.6125	2	4	3	1	0	0.2	0.181818	0.363636	0.3	0.1	0	17.0278	44.3472	27.3194
7	136	10	curved	1	3	10	2.758	66	18	R	F	1	Psyc	1	10	-8.6125	2	4	3	1	0	0.2	0.181818	0.363636	0.3	0.1	0	17.0278	44.3472	27.3194
7	137	14	curved	1	8	20	1.186	58	18	R	F	1	Psyc	1	10	-8.6125	2	4	3	1	0	0.2	0.181818	0.363636	0.3	0.1	0	17.0278	44.3472	27.3194
7	138	65	curved	1	4	10	0.985	49	18	R	F	1	Psyc	1	10	-8.6125	2	4	3	1	0	0.2	0.181818	0.363636	0.3	0.1	0	17.0278	44.3472	27.3194
7	139	33	curved	1	10	20	0.983	69	18	R	F	1	Psyc	1	10	-8.6125	2	4	3	1	0	0.2	0.181818	0.363636	0.3	0.1	0	17.0278	44.3472	27.3194
7	140	51	curved	1	10	20	0.714	86	18	R	F	1	Psyc	1	10	-8.6125	2	4	3	1	0	0.2	0.181818	0.363636	0.3	0.1	0	17.0278	44.3472	27.3194
7	141	32	curved	1	8	20	1.137	73	18	R	F	1	Psyc	1	10	-8.6125	2	4	3	1	0	0.2	0.181818	0.363636	0.3	0.1	0	17.0278	44.3472	27.3194
7	142	31	curved	1	6	20	1.203	77	18	R	F	1	Psyc	1	10	-8.6125	2	4	3	1	0	0.2	0.181818	0.363636	0.3	0.1	0	17.0278	44.3472	27.3194
7	143	95	angular	0	8	20	1.621	23	18	R	F	1	Psyc	1	10	-8.6125	2	4	3	1	0	0.2	0.181818	0.363636	0.3	0.1	0	17.0278	44.3472	27.3194
7	144	55	angular	0	3	10	0.886	16	18	R	F	1	Psyc	1	10	-8.6125	2	4	3	1	0	0.2	0.181818	0.363636	0.3	0.1	0	17.0278	44.3472	27.3194
8	1	22	angular	0	6	20	0.941	15	19	R	F	1	Psyc	1	21	2.3875	3	6	7	2	3	0.42	0.272727	0.545455	0.7	0.2	0.3	28.9306	48.3056	19.375
8	2	127	angular	0	3	10	1.49	19	19	R	F	1	Psyc	1	21	2.3875	3	6	7	2	3	0.42	0.272727	0.545455	0.7	0.2	0.3	28.9306	48.3056	19.375
8	3	56	angular	0	4	10	0.974	16	19	R	F	1	Psyc	1	21	2.3875	3	6	7	2	3	0.42	0.272727	0.545455	0.7	0.2	0.3	28.9306	48.3056	19.375
8	4	101	curved	1	4	10	1.489	50	19	R	F	1	Psyc	1	21	2.3875	3	6	7	2	3	0.42	0.272727	0.545455	0.7	0.2	0.3	28.9306	48.3056	19.375
8	5	61	angular	0	9	30	1.656	28	19	R	F	1	Psyc	1	21	2.3875	3	6	7	2	3	0.42	0.272727	0.545455	0.7	0.2	0.3	28.9306	48.3056	19.375
8	6	117	angular	0	15	30	1.19	29	19	R	F	1	Psyc	1	21	2.3875	3	6	7	2	3	0.42	0.272727	0.545455	0.7	0.2	0.3	28.9306	48.3056	19.375
8	7	68	curved	1	8	20	1.24	50	19	R	F	1	Psyc	1	21	2.3875	3	6	7	2	3	0.42	0.272727	0.545455	0.7	0.2	0.3	28.9306	48.3056	19.375
8	8	128	angular	0	4	10	1.004	44	19	R	F	1	Psyc	1	21	2.3875	3	6	7	2	3	0.42	0.272727	0.545455	0.7	0.2	0.3	28.9306	48.3056	19.375
8	9	60	angular	0	10	20	0.707	36	19	R	F	1	Psyc	1	21	2.3875	3	6	7	2	3	0.42	0.272727	0.545455	0.7	0.2	0.3	28.9306	48.3056	19.375
8	10	77	angular	0	8	20	0.573	28	19	R	F	1	Psyc	1	21	2.3875	3	6	7	2	3	0.42	0.272727	0.545455	0.7	0.2	0.3	28.9306	48.3056	19.375
8	11	122	curved	1	8	20	0.787	38	19	R	F	1	Psyc	1	21	2.3875	3	6	7	2	3	0.42	0.272727	0.545455	0.7	0.2	0.3	28.9306	48.3056	19.375
8	12	82	curved	1	3	10	1.053	71	19	R	F	1	Psyc	1	21	2.3875	3	6	7	2	3	0.42	0.272727	0.545455	0.7	0.2	0.3	28.9306	48.3056	19.375
8	13	44	angular	0	12	30	1.041	18	19	R	F	1	Psyc	1	21	2.3875	3	6	7	2	3	0.42	0.272727	0.545455	0.7	0.2	0.3	28.9306	48.3056	19.375
8	14	34	curved	1	9	30	1.34	38	19	R	F	1	Psyc	1	21	2.3875	3	6	7	2	3	0.42	0.272727	0.545455	0.7	0.2	0.3	28.9306	48.3056	19.375
8	15	97	angular	0	9	30	0.838	22	19	R	F	1	Psyc	1	21	2.3875	3	6	7	2	3	0.42	0.272727	0.545455	0.7	0.2	0.3	28.9306	48.3056	19.375
8	16	73	angular	0	3	10	0.459	22	19	R	F	1	Psyc	1	21	2.3875	3	6	7	2	3	0.42	0.272727	0.545455	0.7	0.2	0.3	28.9306	48.3056	19.375
8	17	28	curved	1	3	10	1.136	71	19	R	F	1	Psyc	1	21	2.3875	3	6	7	2	3	0.42	0.272727	0.545455	0.7	0.2	0.3	28.9306	48.3056	19.375
8	18	75	angular	0	5	10	0.586	59	19	R	F	1	Psyc	1	21	2.3875	3	6	7	2	3	0.42	0.272727	0.545455	0.7	0.2	0.3	28.9306	48.3056	19.375
8	19	40	angular	0	6	20	0.555	33	19	R	F	1	Psyc	1	21	2.3875	3	6	7	2	3	0.42	0.272727	0.545455	0.7	0.2	0.3	28.9306	48.3056	19.375
8	20	8	angular	0	12	30	1.123	19	19	R	F	1	Psyc	1	21	2.3875	3	6	7	2	3	0.42	0.272727	0.545455	0.7	0.2	0.3	28.9306	48.3056	19.375
8	21	24	angular	0	10	20	0.907	15	19	R	F	1	Psyc	1	21	2.3875	3	6	7	2	3	0.42	0.272727	0.545455	0.7	0.2	0.3	28.9306	48.3056	19.375
8	22	78	angular	0	10	20	0.775	15	19	R	F	1	Psyc	1	21	2.3875	3	6	7	2	3	0.42	0.272727	0.545455	0.7	0.2	0.3	28.9306	48.3056	19.375
8	23	137	curved	1	4	10	1.057	74	19	R	F	1	Psyc	1	21	2.3875	3	6	7	2	3	0.42	0.272727	0.545455	0.7	0.2	0.3	28.9306	48.3056	19.375
8	24	125	curved	1	12	30	1.507	55	19	R	F	1	Psyc	1	21	2.3875	3	6	7	2	3	0.42	0.272727	0.545455	0.7	0.2	0.3	28.9306	48.3056	19.375
8	25	4	angular	0	6	20	1.207	31	19	R	F	1	Psyc	1	21	2.3875	3	6	7	2	3	0.42	0.272727	0.545455	0.7	0.2	0.3	28.9306	48.3056	19.375
8	26	29	curved	1	4	10	0.956	55	19	R	F	1	Psyc	1	21	2.3875	3	6	7	2	3	0.42	0.272727	0.545455	0.7	0.2	0.3	28.9306	48.3056	19.375
8	27	16	curved	1	9	30	1.042	40	19	R	F	1	Psyc	1	21	2.3875	3	6	7	2	3	0.42	0.272727	0.545455	0.7	0.2	0.3	28.9306	48.3056	19.375
8	28	81	angular	0	15	30	0.942	21	19	R	F	1	Psyc	1	21	2.3875	3	6	7	2	3	0.42	0.272727	0.545455	0.7	0.2	0.3	28.9306	48.3056	19.375
8	29	138	curved	1	5	10	0.891	63	19	R	F	1	Psyc	1	21	2.3875	3	6	7	2	3	0.42	0.272727	0.545455	0.7	0.2	0.3	28.9306	48.3056	19.375
8	30	71	curved	1	12	30	1.174	48	19	R	F	1	Psyc	1	21	2.3875	3	6	7	2	3	0.42	0.272727	0.545455	0.7	0.2	0.3	28.9306	48.3056	19.375
8	31	62	angular	0	12	30	0.89	30	19	R	F	1	Psyc	1	21	2.3875	3	6	7	2	3	0.42	0.272727	0.545455	0.7	0.2	0.3	28.9306	48.3056	19.375
8	32	84	curved	1	5	10	1.057	70	19	R	F	1	Psyc	1	21	2.3875	3	6	7	2	3	0.42	0.272727	0.545455	0.7	0.2	0.3	28.9306	48.3056	19.375
8	33	52	curved	1	9	30	0.84	35	19	R	F	1	Psyc	1	21	2.3875	3	6	7	2	3	0.42	0.272727	0.545455	0.7	0.2	0.3	28.9306	48.3056	19.375
8	34	76	angular	0	6	20	1.274	25	19	R	F	1	Psyc	1	21	2.3875	3	6	7	2	3	0.42	0.272727	0.545455	0.7	0.2	0.3	28.9306	48.3056	19.375
8	35	27	angular	0	15	30	0.908	16	19	R	F	1	Psyc	1	21	2.3875	3	6	7	2	3	0.42	0.272727	0.545455	0.7	0.2	0.3	28.9306	48.3056	19.375
8	36	142	curved	1	9	30	0.991	16	19	R	F	1	Psyc	1	21	2.3875	3	6	7	2	3	0.42	0.272727	0.545455	0.7	0.2	0.3	28.9306	48.3056	19.375
8	37	86	curved	1	8	20	1.054	69	19	R	F	1	Psyc	1	21	2.3875	3	6	7	2	3	0.42	0.272727	0.545455	0.7	0.2	0.3	28.9306	48.3056	19.375
8	38	23	angular	0	8	20	1.124	31	19	R	F	1	Psyc	1	21	2.3875	3	6	7	2	3	0.42	0.272727	0.545455	0.7	0.2	0.3	28.9306	48.3056	19.375
8	39	139	curved	1	6	20	1.189	53	19	R	F	1	Psyc	1	21	2.3875	3	6	7	2	3	0.42	0.272727	0.545455	0.7	0.2	0.3	28.9306	48.3056	19.375
8	40	35	curved	1	12	30	1.154	32	19	R	F	1	Psyc	1	21	2.3875	3	6	7	2	3	0.42	0.272727	0.545455	0.7	0.2	0.3	28.9306	48.3056	19.375
8	41	12	curved	1	5	10	0.821	68	19	R	F	1	Psyc	1	21	2.3875	3	6	7	2	3	0.42	0.272727	0.545455	0.7	0.2	0.3	28.9306	48.3056	19.375
8	42	113	angular	0	8	20	1.073	26	19	R	F	1	Psyc	1	21	2.3875	3	6	7	2	3	0.42	0.272727	0.545455	0.7	0.2	0.3	28.9306	48.3056	19.375
8	43	120	curved	1	5	10	1.223	74	19	R	F	1	Psyc	1	21	2.3875	3	6	7	2	3	0.42	0.272727	0.545455	0.7	0.2	0.3	28.9306	48.3056	19.375
8	44	72	curved	1	15	30	0.855	25	19	R	F	1	Psyc	1	21	2.3875	3	6	7	2	3	0.42	0.272727	0.545455	0.7	0.2	0.3	28.9306	48.3056	19.375
8	45	99	angular	0	15	30	0.955	13	19	R	F	1	Psyc	1	21	2.3875	3	6	7	2	3	0.42	0.272727	0.545455	0.7	0.2	0.3	28.9306	48.3056	19.375
8	46	107	curved	1	12	30	1.24	11	19	R	F	1	Psyc	1	21	2.3875	3	6	7	2	3	0.42	0.272727	0.545455	0.7	0.2	0.3	28.9306	48.3056	19.375
8	47	131	angular	0	8	20	1.885	13	19	R	F	1	Psyc	1	21	2.3875	3	6	7	2	3	0.42	0.272727	0.545455	0.7	0.2	0.3	28.9306	48.3056	19.375
8	48	45	angular	0	15	30	0.875	7	19	R	F	1	Psyc	1	21	2.3875	3	6	7	2	3	0.42	0.272727	0.545455	0.7	0.2	0.3	28.9306	48.3056	19.375
8	49	106	curved	1	9	30	0.639	26	19	R	F	1	Psyc	1	21	2.3875	3	6	7	2	3	0.42	0.272727	0.545455	0.7	0.2	0.3	28.9306	48.3056	19.375
8	50	30	curved	1	5	10	1.755	74	19	R	F	1	Psyc	1	21	2.3875	3	6	7	2	3	0.42	0.272727	0.545455	0.7	0.2	0.3	28.9306	48.3056	19.375
8	51	18	curved	1	15	30	1.008	30	19	R	F	1	Psyc	1	21	2.3875	3	6	7	2	3	0.42	0.272727	0.545455	0.7	0.2	0.3	28.9306	48.3056	19.375
8	52	100	curved	1	3	10	0.571	57	19	R	F	1	Psyc	1	21	2.3875	3	6	7	2	3	0.42	0.272727	0.545455	0.7	0.2	0.3	28.9306	48.3056	19.375
8	53	36	curved	1	15	30	0.671	41	19	R	F	1	Psyc	1	21	2.3875	3	6	7	2	3	0.42	0.272727	0.545455	0.7	0.2	0.3	28.9306	48.3056	19.375
8	54	85	curved	1	6	20	0.525	41	19	R	F	1	Psyc	1	21	2.3875	3	6	7	2	3	0.42	0.272727	0.545455	0.7	0.2	0.3	28.9306	48.3056	19.375
8	55	132	angular	0	10	20	0.491	28	19	R	F	1	Psyc	1	21	2.3875	3	6	7	2	3	0.42	0.272727	0.545455	0.7	0.2	0.3	28.9306	48.3056	19.375
8	56	39	angular	0	5	10	0.792	30	19	R	F	1	Psyc	1	21	2.3875	3	6	7	2	3	0.42	0.272727	0.545455	0.7	0.2	0.3	28.9306	48.3056	19.375
8	57	119	curved	1	4	10	0.838	77	19	R	F	1	Psyc	1	21	2.3875	3	6	7	2	3	0.42	0.272727	0.545455	0.7	0.2	0.3	28.9306	48.3056	19.375
8	58	59	angular	0	8	20	0.908	20	19	R	F	1	Psyc	1	21	2.3875	3	6	7	2	3	0.42	0.272727	0.545455	0.7	0.2	0.3	28.9306	48.3056	19.375
8	59	90	curved	1	15	30	0.708	16	19	R	F	1	Psyc	1	21	2.3875	3	6	7	2	3	0.42	0.272727	0.545455	0.7	0.2	0.3	28.9306	48.3056	19.375
8	60	53	curved	1	12	30	0.572	26	19	R	F	1	Psyc	1	21	2.3875	3	6	7	2	3	0.42	0.272727	0.545455	0.7	0.2	0.3	28.9306	48.3056	19.375
8	61	98	angular	0	12	30	0.572	22	19	R	F	1	Psyc	1	21	2.3875	3	6	7	2	3	0.42	0.272727	0.545455	0.7	0.2	0.3	28.9306	48.3056	19.375
8	62	46	curved	1	3	10	0.556	59	19	R	F	1	Psyc	1	21	2.3875	3	6	7	2	3	0.42	0.272727	0.545455	0.7	0.2	0.3	28.9306	48.3056	19.375
8	63	108	curved	1	15	30	0.554	46	19	R	F	1	Psyc	1	21	2.3875	3	6	7	2	3	0.42	0.272727	0.545455	0.7	0.2	0.3	28.9306	48.3056	19.375
8	64	91	angular	0	3	10	0.405	36	19	R	F	1	Psyc	1	21	2.3875	3	6	7	2	3	0.42	0.272727	0.545455	0.7	0.2	0.3	28.9306	48.3056	19.375
8	65	19	angular	0	3	10	0.989	33	19	R	F	1	Psyc	1	21	2.3875	3	6	7	2	3	0.42	0.272727	0.545455	0.7	0.2	0.3	28.9306	48.3056	19.375
8	66	69	curved	1	10	20	2.903	35	19	R	F	1	Psyc	1	21	2.3875	3	6	7	2	3	0.42	0.272727	0.545455	0.7	0.2	0.3	28.9306	48.3056	19.375
8	67	144	curved	1	15	30	0.892	22	19	R	F	1	Psyc	1	21	2.3875	3	6	7	2	3	0.42	0.272727	0.545455	0.7	0.2	0.3	28.9306	48.3056	19.375
8	68	70	curved	1	9	30	0.808	22	19	R	F	1	Psyc	1	21	2.3875	3	6	7	2	3	0.42	0.272727	0.545455	0.7	0.2	0.3	28.9306	48.3056	19.375
8	69	57	angular	0	5	10	0.522	27	19	R	F	1	Psyc	1	21	2.3875	3	6	7	2	3	0.42	0.272727	0.545455	0.7	0.2	0.3	28.9306	48.3056	19.375
8	70	41	angular	0	8	20	1.405	20	19	R	F	1	Psyc	1	21	2.3875	3	6	7	2	3	0.42	0.272727	0.545455	0.7	0.2	0.3	28.9306	48.3056	19.375
8	71	135	angular	0	15	30	1.325	17	19	R	F	1	Psyc	1	21	2.3875	3	6	7	2	3	0.42	0.272727	0.545455	0.7	0.2	0.3	28.9306	48.3056	19.375
8	72	114	angular	0	10	20	0.473	12	19	R	F	1	Psyc	1	21	2.3875	3	6	7	2	3	0.42	0.272727	0.545455	0.7	0.2	0.3	28.9306	48.3056	19.375
8	73	124	curved	1	9	30	0.472	29	19	R	F	1	Psyc	1	21	2.3875	3	6	7	2	3	0.42	0.272727	0.545455	0.7	0.2	0.3	28.9306	48.3056	19.375
8	74	109	angular	0	3	10	0.541	31	19	R	F	1	Psyc	1	21	2.3875	3	6	7	2	3	0.42	0.272727	0.545455	0.7	0.2	0.3	28.9306	48.3056	19.375
8	75	88	curved	1	9	30	0.475	23	19	R	F	1	Psyc	1	21	2.3875	3	6	7	2	3	0.42	0.272727	0.545455	0.7	0.2	0.3	28.9306	48.3056	19.375
8	76	2	angular	0	4	10	0.706	31	19	R	F	1	Psyc	1	21	2.3875	3	6	7	2	3	0.42	0.272727	0.545455	0.7	0.2	0.3	28.9306	48.3056	19.375
8	77	143	curved	1	12	30	0.487	20	19	R	F	1	Psyc	1	21	2.3875	3	6	7	2	3	0.42	0.272727	0.545455	0.7	0.2	0.3	28.9306	48.3056	19.375
8	78	136	curved	1	3	10	1.218	74	19	R	F	1	Psyc	1	21	2.3875	3	6	7	2	3	0.42	0.272727	0.545455	0.7	0.2	0.3	28.9306	48.3056	19.375
8	79	104	curved	1	8	20	0.958	63	19	R	F	1	Psyc	1	21	2.3875	3	6	7	2	3	0.42	0.272727	0.545455	0.7	0.2	0.3	28.9306	48.3056	19.375
8	80	64	curved	1	3	10	0.857	75	19	R	F	1	Psyc	1	21	2.3875	3	6	7	2	3	0.42	0.272727	0.545455	0.7	0.2	0.3	28.9306	48.3056	19.375
8	81	83	curved	1	4	10	0.505	75	19	R	F	1	Psyc	1	21	2.3875	3	6	7	2	3	0.42	0.272727	0.545455	0.7	0.2	0.3	28.9306	48.3056	19.375
8	82	112	angular	0	6	20	0.803	48	19	R	F	1	Psyc	1	21	2.3875	3	6	7	2	3	0.42	0.272727	0.545455	0.7	0.2	0.3	28.9306	48.3056	19.375
8	83	102	curved	1	5	10	0.841	64	19	R	F	1	Psyc	1	21	2.3875	3	6	7	2	3	0.42	0.272727	0.545455	0.7	0.2	0.3	28.9306	48.3056	19.375
8	84	58	angular	0	6	20	0.521	42	19	R	F	1	Psyc	1	21	2.3875	3	6	7	2	3	0.42	0.272727	0.545455	0.7	0.2	0.3	28.9306	48.3056	19.375
8	85	80	angular	0	12	30	0.622	32	19	R	F	1	Psyc	1	21	2.3875	3	6	7	2	3	0.42	0.272727	0.545455	0.7	0.2	0.3	28.9306	48.3056	19.375
8	86	123	curved	1	10	20	1.24	35	19	R	F	1	Psyc	1	21	2.3875	3	6	7	2	3	0.42	0.272727	0.545455	0.7	0.2	0.3	28.9306	48.3056	19.375
8	87	25	angular	0	9	30	1.005	19	19	R	F	1	Psyc	1	21	2.3875	3	6	7	2	3	0.42	0.272727	0.545455	0.7	0.2	0.3	28.9306	48.3056	19.375
8	88	141	curved	1	10	20	1.257	30	19	R	F	1	Psyc	1	21	2.3875	3	6	7	2	3	0.42	0.272727	0.545455	0.7	0.2	0.3	28.9306	48.3056	19.375
8	89	79	angular	0	9	30	1.02	20	19	R	F	1	Psyc	1	21	2.3875	3	6	7	2	3	0.42	0.272727	0.545455	0.7	0.2	0.3	28.9306	48.3056	19.375
8	90	134	angular	0	12	30	1.008	15	19	R	F	1	Psyc	1	21	2.3875	3	6	7	2	3	0.42	0.272727	0.545455	0.7	0.2	0.3	28.9306	48.3056	19.375
8	91	48	curved	1	5	10	1.335	77	19	R	F	1	Psyc	1	21	2.3875	3	6	7	2	3	0.42	0.272727	0.545455	0.7	0.2	0.3	28.9306	48.3056	19.375
8	92	54	curved	1	15	30	0.605	51	19	R	F	1	Psyc	1	21	2.3875	3	6	7	2	3	0.42	0.272727	0.545455	0.7	0.2	0.3	28.9306	48.3056	19.375
8	93	15	curved	1	10	20	0.558	44	19	R	F	1	Psyc	1	21	2.3875	3	6	7	2	3	0.42	0.272727	0.545455	0.7	0.2	0.3	28.9306	48.3056	19.375
8	94	47	curved	1	4	10	0.684	78	19	R	F	1	Psyc	1	21	2.3875	3	6	7	2	3	0.42	0.272727	0.545455	0.7	0.2	0.3	28.9306	48.3056	19.375
8	95	89	curved	1	12	30	0.687	42	19	R	F	1	Psyc	1	21	2.3875	3	6	7	2	3	0.42	0.272727	0.545455	0.7	0.2	0.3	28.9306	48.3056	19.375
8	96	129	angular	0	5	10	1.357	52	19	R	F	1	Psyc	1	21	2.3875	3	6	7	2	3	0.42	0.272727	0.545455	0.7	0.2	0.3	28.9306	48.3056	19.375
8	97	26	angular	0	12	30	0.588	23	19	R	F	1	Psyc	1	21	2.3875	3	6	7	2	3	0.42	0.272727	0.545455	0.7	0.2	0.3	28.9306	48.3056	19.375
8	98	49	curved	1	6	20	0.706	46	19	R	F	1	Psyc	1	21	2.3875	3	6	7	2	3	0.42	0.272727	0.545455	0.7	0.2	0.3	28.9306	48.3056	19.375
8	99	42	angular	0	10	20	0.488	22	19	R	F	1	Psyc	1	21	2.3875	3	6	7	2	3	0.42	0.272727	0.545455	0.7	0.2	0.3	28.9306	48.3056	19.375
8	100	17	curved	1	12	30	0.57	18	19	R	F	1	Psyc	1	21	2.3875	3	6	7	2	3	0.42	0.272727	0.545455	0.7	0.2	0.3	28.9306	48.3056	19.375
8	101	103	curved	1	6	20	1.721	45	19	R	F	1	Psyc	1	21	2.3875	3	6	7	2	3	0.42	0.272727	0.545455	0.7	0.2	0.3	28.9306	48.3056	19.375
8	102	3	angular	0	5	10	0.505	52	19	R	F	1	Psyc	1	21	2.3875	3	6	7	2	3	0.42	0.272727	0.545455	0.7	0.2	0.3	28.9306	48.3056	19.375
8	103	7	angular	0	9	30	0.572	31	19	R	F	1	Psyc	1	21	2.3875	3	6	7	2	3	0.42	0.272727	0.545455	0.7	0.2	0.3	28.9306	48.3056	19.375
8	104	92	angular	0	4	10	1.12	43	19	R	F	1	Psyc	1	21	2.3875	3	6	7	2	3	0.42	0.272727	0.545455	0.7	0.2	0.3	28.9306	48.3056	19.375
8	105	116	angular	0	12	30	0.652	22	19	R	F	1	Psyc	1	21	2.3875	3	6	7	2	3	0.42	0.272727	0.545455	0.7	0.2	0.3	28.9306	48.3056	19.375
8	106	111	angular	0	5	10	0.587	53	19	R	F	1	Psyc	1	21	2.3875	3	6	7	2	3	0.42	0.272727	0.545455	0.7	0.2	0.3	28.9306	48.3056	19.375
8	107	63	angular	0	15	30	0.623	31	19	R	F	1	Psyc	1	21	2.3875	3	6	7	2	3	0.42	0.272727	0.545455	0.7	0.2	0.3	28.9306	48.3056	19.375
8	108	1	angular	0	3	10	1.254	49	19	R	F	1	Psyc	1	21	2.3875	3	6	7	2	3	0.42	0.272727	0.545455	0.7	0.2	0.3	28.9306	48.3056	19.375
8	109	130	angular	0	6	20	0.501	38	19	R	F	1	Psyc	1	21	2.3875	3	6	7	2	3	0.42	0.272727	0.545455	0.7	0.2	0.3	28.9306	48.3056	19.375
8	110	9	angular	0	15	30	0.625	27	19	R	F	1	Psyc	1	21	2.3875	3	6	7	2	3	0.42	0.272727	0.545455	0.7	0.2	0.3	28.9306	48.3056	19.375
8	111	74	angular	0	4	10	0.721	45	19	R	F	1	Psyc	1	21	2.3875	3	6	7	2	3	0.42	0.272727	0.545455	0.7	0.2	0.3	28.9306	48.3056	19.375
8	112	43	angular	0	9	30	0.971	27	19	R	F	1	Psyc	1	21	2.3875	3	6	7	2	3	0.42	0.272727	0.545455	0.7	0.2	0.3	28.9306	48.3056	19.375
8	113	13	curved	1	6	20	1.275	30	19	R	F	1	Psyc	1	21	2.3875	3	6	7	2	3	0.42	0.272727	0.545455	0.7	0.2	0.3	28.9306	48.3056	19.375
8	114	115	angular	0	9	30	1.041	18	19	R	F	1	Psyc	1	21	2.3875	3	6	7	2	3	0.42	0.272727	0.545455	0.7	0.2	0.3	28.9306	48.3056	19.375
8	115	105	curved	1	10	20	1.389	24	19	R	F	1	Psyc	1	21	2.3875	3	6	7	2	3	0.42	0.272727	0.545455	0.7	0.2	0.3	28.9306	48.3056	19.375
8	116	94	angular	0	6	20	1.039	18	19	R	F	1	Psyc	1	21	2.3875	3	6	7	2	3	0.42	0.272727	0.545455	0.7	0.2	0.3	28.9306	48.3056	19.375
8	117	20	angular	0	4	10	0.689	28	19	R	F	1	Psyc	1	21	2.3875	3	6	7	2	3	0.42	0.272727	0.545455	0.7	0.2	0.3	28.9306	48.3056	19.375
8	118	110	angular	0	4	10	0.572	36	19	R	F	1	Psyc	1	21	2.3875	3	6	7	2	3	0.42	0.272727	0.545455	0.7	0.2	0.3	28.9306	48.3056	19.375
8	119	6	angular	0	10	20	0.487	23	19	R	F	1	Psyc	1	21	2.3875	3	6	7	2	3	0.42	0.272727	0.545455	0.7	0.2	0.3	28.9306	48.3056	19.375
8	120	5	angular	0	8	20	1.005	20	19	R	F	1	Psyc	1	21	2.3875	3	6	7	2	3	0.42	0.272727	0.545455	0.7	0.2	0.3	28.9306	48.3056	19.375
8	121	37	angular	0	3	10	1.419	32	19	R	F	1	Psyc	1	21	2.3875	3	6	7	2	3	0.42	0.272727	0.545455	0.7	0.2	0.3	28.9306	48.3056	19.375
8	122	126	curved	1	15	30	1.422	32	19	R	F	1	Psyc	1	21	2.3875	3	6	7	2	3	0.42	0.272727	0.545455	0.7	0.2	0.3	28.9306	48.3056	19.375
8	123	11	curved	1	4	10	1.07	71	19	R	F	1	Psyc	1	21	2.3875	3	6	7	2	3	0.42	0.272727	0.545455	0.7	0.2	0.3	28.9306	48.3056	19.375
8	124	118	curved	1	3	10	0.608	71	19	R	F	1	Psyc	1	21	2.3875	3	6	7	2	3	0.42	0.272727	0.545455	0.7	0.2	0.3	28.9306	48.3056	19.375
8	125	96	angular	0	10	20	2.603	47	19	R	F	1	Psyc	1	21	2.3875	3	6	7	2	3	0.42	0.272727	0.545455	0.7	0.2	0.3	28.9306	48.3056	19.375
8	126	38	angular	0	4	10	0.808	55	19	R	F	1	Psyc	1	21	2.3875	3	6	7	2	3	0.42	0.272727	0.545455	0.7	0.2	0.3	28.9306	48.3056	19.375
8	127	50	curved	1	8	20	2.051	35	19	R	F	1	Psyc	1	21	2.3875	3	6	7	2	3	0.42	0.272727	0.545455	0.7	0.2	0.3	28.9306	48.3056	19.375
8	128	87	curved	1	10	20	1.703	43	19	R	F	1	Psyc	1	21	2.3875	3	6	7	2	3	0.42	0.272727	0.545455	0.7	0.2	0.3	28.9306	48.3056	19.375
8	129	133	angular	0	9	30	1.021	28	19	R	F	1	Psyc	1	21	2.3875	3	6	7	2	3	0.42	0.272727	0.545455	0.7	0.2	0.3	28.9306	48.3056	19.375
8	130	21	angular	0	5	10	0.605	37	19	R	F	1	Psyc	1	21	2.3875	3	6	7	2	3	0.42	0.272727	0.545455	0.7	0.2	0.3	28.9306	48.3056	19.375
8	131	93	angular	0	5	10	1.206	42	19	R	F	1	Psyc	1	21	2.3875	3	6	7	2	3	0.42	0.272727	0.545455	0.7	0.2	0.3	28.9306	48.3056	19.375
8	132	140	curved	1	8	20	1.59	38	19	R	F	1	Psyc	1	21	2.3875	3	6	7	2	3	0.42	0.272727	0.545455	0.7	0.2	0.3	28.9306	48.3056	19.375
8	133	66	curved	1	5	10	2.42	69	19	R	F	1	Psyc	1	21	2.3875	3	6	7	2	3	0.42	0.272727	0.545455	0.7	0.2	0.3	28.9306	48.3056	19.375
8	134	121	curved	1	6	20	2.202	51	19	R	F	1	Psyc	1	21	2.3875	3	6	7	2	3	0.42	0.272727	0.545455	0.7	0.2	0.3	28.9306	48.3056	19.375
8	135	67	curved	1	6	20	1.872	51	19	R	F	1	Psyc	1	21	2.3875	3	6	7	2	3	0.42	0.272727	0.545455	0.7	0.2	0.3	28.9306	48.3056	19.375
8	136	10	curved	1	3	10	1.174	60	19	R	F	1	Psyc	1	21	2.3875	3	6	7	2	3	0.42	0.272727	0.545455	0.7	0.2	0.3	28.9306	48.3056	19.375
8	137	14	curved	1	8	20	0.688	42	19	R	F	1	Psyc	1	21	2.3875	3	6	7	2	3	0.42	0.272727	0.545455	0.7	0.2	0.3	28.9306	48.3056	19.375
8	138	65	curved	1	4	10	1.472	68	19	R	F	1	Psyc	1	21	2.3875	3	6	7	2	3	0.42	0.272727	0.545455	0.7	0.2	0.3	28.9306	48.3056	19.375
8	139	33	curved	1	10	20	0.637	62	19	R	F	1	Psyc	1	21	2.3875	3	6	7	2	3	0.42	0.272727	0.545455	0.7	0.2	0.3	28.9306	48.3056	19.375
8	140	51	curved	1	10	20	0.626	62	19	R	F	1	Psyc	1	21	2.3875	3	6	7	2	3	0.42	0.272727	0.545455	0.7	0.2	0.3	28.9306	48.3056	19.375
8	141	32	curved	1	8	20	0.602	51	19	R	F	1	Psyc	1	21	2.3875	3	6	7	2	3	0.42	0.272727	0.545455	0.7	0.2	0.3	28.9306	48.3056	19.375
8	142	31	curved	1	6	20	0.41	51	19	R	F	1	Psyc	1	21	2.3875	3	6	7	2	3	0.42	0.272727	0.545455	0.7	0.2	0.3	28.9306	48.3056	19.375
8	143	95	angular	0	8	20	0.652	35	19	R	F	1	Psyc	1	21	2.3875	3	6	7	2	3	0.42	0.272727	0.545455	0.7	0.2	0.3	28.9306	48.3056	19.375
8	144	55	angular	0	3	10	0.658	35	19	R	F	1	Psyc	1	21	2.3875	3	6	7	2	3	0.42	0.272727	0.545455	0.7	0.2	0.3	28.9306	48.3056	19.375
9	1	22	angular	0	6	20	3.151	38	18	R	F	1	Psyc	1	6	-12.6125	0	1	1	0	3	0.12	0	0.0909091	0.1	0	0.3	58.0833	65.0417	6.95833
9	2	127	angular	0	3	10	0.807	76	18	R	F	1	Psyc	1	6	-12.6125	0	1	1	0	3	0.12	0	0.0909091	0.1	0	0.3	58.0833	65.0417	6.95833
9	3	56	angular	0	4	10	1.071	28	18	R	F	1	Psyc	1	6	-12.6125	0	1	1	0	3	0.12	0	0.0909091	0.1	0	0.3	58.0833	65.0417	6.95833
9	4	101	curved	1	4	10	0.64	66	18	R	F	1	Psyc	1	6	-12.6125	0	1	1	0	3	0.12	0	0.0909091	0.1	0	0.3	58.0833	65.0417	6.95833
9	5	61	angular	0	9	30	0.87	33	18	R	F	1	Psyc	1	6	-12.6125	0	1	1	0	3	0.12	0	0.0909091	0.1	0	0.3	58.0833	65.0417	6.95833
9	6	117	angular	0	15	30	0.958	37	18	R	F	1	Psyc	1	6	-12.6125	0	1	1	0	3	0.12	0	0.0909091	0.1	0	0.3	58.0833	65.0417	6.95833
9	7	68	curved	1	8	20	1.472	37	18	R	F	1	Psyc	1	6	-12.6125	0	1	1	0	3	0.12	0	0.0909091	0.1	0	0.3	58.0833	65.0417	6.95833
9	8	128	angular	0	4	10	1.756	53	18	R	F	1	Psyc	1	6	-12.6125	0	1	1	0	3	0.12	0	0.0909091	0.1	0	0.3	58.0833	65.0417	6.95833
9	9	60	angular	0	10	20	1.153	70	18	R	F	1	Psyc	1	6	-12.6125	0	1	1	0	3	0.12	0	0.0909091	0.1	0	0.3	58.0833	65.0417	6.95833
9	10	77	angular	0	8	20	1.057	62	18	R	F	1	Psyc	1	6	-12.6125	0	1	1	0	3	0.12	0	0.0909091	0.1	0	0.3	58.0833	65.0417	6.95833
9	11	122	curved	1	8	20	0.82	55	18	R	F	1	Psyc	1	6	-12.6125	0	1	1	0	3	0.12	0	0.0909091	0.1	0	0.3	58.0833	65.0417	6.95833
9	12	82	curved	1	3	10	0.523	74	18	R	F	1	Psyc	1	6	-12.6125	0	1	1	0	3	0.12	0	0.0909091	0.1	0	0.3	58.0833	65.0417	6.95833
9	13	44	angular	0	12	30	0.492	84	18	R	F	1	Psyc	1	6	-12.6125	0	1	1	0	3	0.12	0	0.0909091	0.1	0	0.3	58.0833	65.0417	6.95833
9	14	34	curved	1	9	30	1.87	85	18	R	F	1	Psyc	1	6	-12.6125	0	1	1	0	3	0.12	0	0.0909091	0.1	0	0.3	58.0833	65.0417	6.95833
9	15	97	angular	0	9	30	1.335	65	18	R	F	1	Psyc	1	6	-12.6125	0	1	1	0	3	0.12	0	0.0909091	0.1	0	0.3	58.0833	65.0417	6.95833
9	16	73	angular	0	3	10	3.596	36	18	R	F	1	Psyc	1	6	-12.6125	0	1	1	0	3	0.12	0	0.0909091	0.1	0	0.3	58.0833	65.0417	6.95833
9	17	28	curved	1	3	10	0.604	26	18	R	F	1	Psyc	1	6	-12.6125	0	1	1	0	3	0.12	0	0.0909091	0.1	0	0.3	58.0833	65.0417	6.95833
9	18	75	angular	0	5	10	2.65	61	18	R	F	1	Psyc	1	6	-12.6125	0	1	1	0	3	0.12	0	0.0909091	0.1	0	0.3	58.0833	65.0417	6.95833
9	19	40	angular	0	6	20	3.32	43	18	R	F	1	Psyc	1	6	-12.6125	0	1	1	0	3	0.12	0	0.0909091	0.1	0	0.3	58.0833	65.0417	6.95833
9	20	8	angular	0	12	30	5.378	83	18	R	F	1	Psyc	1	6	-12.6125	0	1	1	0	3	0.12	0	0.0909091	0.1	0	0.3	58.0833	65.0417	6.95833
9	21	24	angular	0	10	20	1.337	71	18	R	F	1	Psyc	1	6	-12.6125	0	1	1	0	3	0.12	0	0.0909091	0.1	0	0.3	58.0833	65.0417	6.95833
9	22	78	angular	0	10	20	1.805	29	18	R	F	1	Psyc	1	6	-12.6125	0	1	1	0	3	0.12	0	0.0909091	0.1	0	0.3	58.0833	65.0417	6.95833
9	23	137	curved	1	4	10	0.705	64	18	R	F	1	Psyc	1	6	-12.6125	0	1	1	0	3	0.12	0	0.0909091	0.1	0	0.3	58.0833	65.0417	6.95833
9	24	125	curved	1	12	30	2.986	32	18	R	F	1	Psyc	1	6	-12.6125	0	1	1	0	3	0.12	0	0.0909091	0.1	0	0.3	58.0833	65.0417	6.95833
9	25	4	angular	0	6	20	1.257	56	18	R	F	1	Psyc	1	6	-12.6125	0	1	1	0	3	0.12	0	0.0909091	0.1	0	0.3	58.0833	65.0417	6.95833
9	26	29	curved	1	4	10	1.35	31	18	R	F	1	Psyc	1	6	-12.6125	0	1	1	0	3	0.12	0	0.0909091	0.1	0	0.3	58.0833	65.0417	6.95833
9	27	16	curved	1	9	30	1.506	30	18	R	F	1	Psyc	1	6	-12.6125	0	1	1	0	3	0.12	0	0.0909091	0.1	0	0.3	58.0833	65.0417	6.95833
9	28	81	angular	0	15	30	1.902	70	18	R	F	1	Psyc	1	6	-12.6125	0	1	1	0	3	0.12	0	0.0909091	0.1	0	0.3	58.0833	65.0417	6.95833
9	29	138	curved	1	5	10	0.857	63	18	R	F	1	Psyc	1	6	-12.6125	0	1	1	0	3	0.12	0	0.0909091	0.1	0	0.3	58.0833	65.0417	6.95833
9	30	71	curved	1	12	30	1.903	73	18	R	F	1	Psyc	1	6	-12.6125	0	1	1	0	3	0.12	0	0.0909091	0.1	0	0.3	58.0833	65.0417	6.95833
9	31	62	angular	0	12	30	1.09	63	18	R	F	1	Psyc	1	6	-12.6125	0	1	1	0	3	0.12	0	0.0909091	0.1	0	0.3	58.0833	65.0417	6.95833
9	32	84	curved	1	5	10	1.555	89	18	R	F	1	Psyc	1	6	-12.6125	0	1	1	0	3	0.12	0	0.0909091	0.1	0	0.3	58.0833	65.0417	6.95833
9	33	52	curved	1	9	30	0.622	82	18	R	F	1	Psyc	1	6	-12.6125	0	1	1	0	3	0.12	0	0.0909091	0.1	0	0.3	58.0833	65.0417	6.95833
9	34	76	angular	0	6	20	3.364	34	18	R	F	1	Psyc	1	6	-12.6125	0	1	1	0	3	0.12	0	0.0909091	0.1	0	0.3	58.0833	65.0417	6.95833
9	35	27	angular	0	15	30	4.78	40	18	R	F	1	Psyc	1	6	-12.6125	0	1	1	0	3	0.12	0	0.0909091	0.1	0	0.3	58.0833	65.0417	6.95833
9	36	142	curved	1	9	30	0.906	36	18	R	F	1	Psyc	1	6	-12.6125	0	1	1	0	3	0.12	0	0.0909091	0.1	0	0.3	58.0833	65.0417	6.95833
9	37	86	curved	1	8	20	0.788	46	18	R	F	1	Psyc	1	6	-12.6125	0	1	1	0	3	0.12	0	0.0909091	0.1	0	0.3	58.0833	65.0417	6.95833
9	38	23	angular	0	8	20	2.737	81	18	R	F	1	Psyc	1	6	-12.6125	0	1	1	0	3	0.12	0	0.0909091	0.1	0	0.3	58.0833	65.0417	6.95833
9	39	139	curved	1	6	20	1.638	80	18	R	F	1	Psyc	1	6	-12.6125	0	1	1	0	3	0.12	0	0.0909091	0.1	0	0.3	58.0833	65.0417	6.95833
9	40	35	curved	1	12	30	0.937	71	18	R	F	1	Psyc	1	6	-12.6125	0	1	1	0	3	0.12	0	0.0909091	0.1	0	0.3	58.0833	65.0417	6.95833
9	41	12	curved	1	5	10	0.559	88	18	R	F	1	Psyc	1	6	-12.6125	0	1	1	0	3	0.12	0	0.0909091	0.1	0	0.3	58.0833	65.0417	6.95833
9	42	113	angular	0	8	20	2.634	38	18	R	F	1	Psyc	1	6	-12.6125	0	1	1	0	3	0.12	0	0.0909091	0.1	0	0.3	58.0833	65.0417	6.95833
9	43	120	curved	1	5	10	2.466	77	18	R	F	1	Psyc	1	6	-12.6125	0	1	1	0	3	0.12	0	0.0909091	0.1	0	0.3	58.0833	65.0417	6.95833
9	44	72	curved	1	15	30	2.269	71	18	R	F	1	Psyc	1	6	-12.6125	0	1	1	0	3	0.12	0	0.0909091	0.1	0	0.3	58.0833	65.0417	6.95833
9	45	99	angular	0	15	30	1.224	86	18	R	F	1	Psyc	1	6	-12.6125	0	1	1	0	3	0.12	0	0.0909091	0.1	0	0.3	58.0833	65.0417	6.95833
9	46	107	curved	1	12	30	4.896	33	18	R	F	1	Psyc	1	6	-12.6125	0	1	1	0	3	0.12	0	0.0909091	0.1	0	0.3	58.0833	65.0417	6.95833
9	47	131	angular	0	8	20	1.784	81	18	R	F	1	Psyc	1	6	-12.6125	0	1	1	0	3	0.12	0	0.0909091	0.1	0	0.3	58.0833	65.0417	6.95833
9	48	45	angular	0	15	30	2.582	76	18	R	F	1	Psyc	1	6	-12.6125	0	1	1	0	3	0.12	0	0.0909091	0.1	0	0.3	58.0833	65.0417	6.95833
9	49	106	curved	1	9	30	2.382	86	18	R	F	1	Psyc	1	6	-12.6125	0	1	1	0	3	0.12	0	0.0909091	0.1	0	0.3	58.0833	65.0417	6.95833
9	50	30	curved	1	5	10	3.996	95	18	R	F	1	Psyc	1	6	-12.6125	0	1	1	0	3	0.12	0	0.0909091	0.1	0	0.3	58.0833	65.0417	6.95833
9	51	18	curved	1	15	30	1.507	95	18	R	F	1	Psyc	1	6	-12.6125	0	1	1	0	3	0.12	0	0.0909091	0.1	0	0.3	58.0833	65.0417	6.95833
9	52	100	curved	1	3	10	1.671	95	18	R	F	1	Psyc	1	6	-12.6125	0	1	1	0	3	0.12	0	0.0909091	0.1	0	0.3	58.0833	65.0417	6.95833
9	53	36	curved	1	15	30	2.501	68	18	R	F	1	Psyc	1	6	-12.6125	0	1	1	0	3	0.12	0	0.0909091	0.1	0	0.3	58.0833	65.0417	6.95833
9	54	85	curved	1	6	20	0.67	62	18	R	F	1	Psyc	1	6	-12.6125	0	1	1	0	3	0.12	0	0.0909091	0.1	0	0.3	58.0833	65.0417	6.95833
9	55	132	angular	0	10	20	1.125	52	18	R	F	1	Psyc	1	6	-12.6125	0	1	1	0	3	0.12	0	0.0909091	0.1	0	0.3	58.0833	65.0417	6.95833
9	56	39	angular	0	5	10	1.572	45	18	R	F	1	Psyc	1	6	-12.6125	0	1	1	0	3	0.12	0	0.0909091	0.1	0	0.3	58.0833	65.0417	6.95833
9	57	119	curved	1	4	10	0.655	95	18	R	F	1	Psyc	1	6	-12.6125	0	1	1	0	3	0.12	0	0.0909091	0.1	0	0.3	58.0833	65.0417	6.95833
9	58	59	angular	0	8	20	1.024	76	18	R	F	1	Psyc	1	6	-12.6125	0	1	1	0	3	0.12	0	0.0909091	0.1	0	0.3	58.0833	65.0417	6.95833
9	59	90	curved	1	15	30	1.373	66	18	R	F	1	Psyc	1	6	-12.6125	0	1	1	0	3	0.12	0	0.0909091	0.1	0	0.3	58.0833	65.0417	6.95833
9	60	53	curved	1	12	30	1.07	60	18	R	F	1	Psyc	1	6	-12.6125	0	1	1	0	3	0.12	0	0.0909091	0.1	0	0.3	58.0833	65.0417	6.95833
9	61	98	angular	0	12	30	0.509	53	18	R	F	1	Psyc	1	6	-12.6125	0	1	1	0	3	0.12	0	0.0909091	0.1	0	0.3	58.0833	65.0417	6.95833
9	62	46	curved	1	3	10	2.817	76	18	R	F	1	Psyc	1	6	-12.6125	0	1	1	0	3	0.12	0	0.0909091	0.1	0	0.3	58.0833	65.0417	6.95833
9	63	108	curved	1	15	30	1.54	58	18	R	F	1	Psyc	1	6	-12.6125	0	1	1	0	3	0.12	0	0.0909091	0.1	0	0.3	58.0833	65.0417	6.95833
9	64	91	angular	0	3	10	3.233	72	18	R	F	1	Psyc	1	6	-12.6125	0	1	1	0	3	0.12	0	0.0909091	0.1	0	0.3	58.0833	65.0417	6.95833
9	65	19	angular	0	3	10	1.385	58	18	R	F	1	Psyc	1	6	-12.6125	0	1	1	0	3	0.12	0	0.0909091	0.1	0	0.3	58.0833	65.0417	6.95833
9	66	69	curved	1	10	20	2.354	65	18	R	F	1	Psyc	1	6	-12.6125	0	1	1	0	3	0.12	0	0.0909091	0.1	0	0.3	58.0833	65.0417	6.95833
9	67	144	curved	1	15	30	1.156	57	18	R	F	1	Psyc	1	6	-12.6125	0	1	1	0	3	0.12	0	0.0909091	0.1	0	0.3	58.0833	65.0417	6.95833
9	68	70	curved	1	9	30	2.9	63	18	R	F	1	Psyc	1	6	-12.6125	0	1	1	0	3	0.12	0	0.0909091	0.1	0	0.3	58.0833	65.0417	6.95833
9	69	57	angular	0	5	10	2.686	90	18	R	F	1	Psyc	1	6	-12.6125	0	1	1	0	3	0.12	0	0.0909091	0.1	0	0.3	58.0833	65.0417	6.95833
9	70	41	angular	0	8	20	3.25	65	18	R	F	1	Psyc	1	6	-12.6125	0	1	1	0	3	0.12	0	0.0909091	0.1	0	0.3	58.0833	65.0417	6.95833
9	71	135	angular	0	15	30	1.207	61	18	R	F	1	Psyc	1	6	-12.6125	0	1	1	0	3	0.12	0	0.0909091	0.1	0	0.3	58.0833	65.0417	6.95833
9	72	114	angular	0	10	20	3.896	85	18	R	F	1	Psyc	1	6	-12.6125	0	1	1	0	3	0.12	0	0.0909091	0.1	0	0.3	58.0833	65.0417	6.95833
9	73	124	curved	1	9	30	0.658	63	18	R	F	1	Psyc	1	6	-12.6125	0	1	1	0	3	0.12	0	0.0909091	0.1	0	0.3	58.0833	65.0417	6.95833
9	74	109	angular	0	3	10	0.642	57	18	R	F	1	Psyc	1	6	-12.6125	0	1	1	0	3	0.12	0	0.0909091	0.1	0	0.3	58.0833	65.0417	6.95833
9	75	88	curved	1	9	30	0.941	64	18	R	F	1	Psyc	1	6	-12.6125	0	1	1	0	3	0.12	0	0.0909091	0.1	0	0.3	58.0833	65.0417	6.95833
9	76	2	angular	0	4	10	4.615	73	18	R	F	1	Psyc	1	6	-12.6125	0	1	1	0	3	0.12	0	0.0909091	0.1	0	0.3	58.0833	65.0417	6.95833
9	77	143	curved	1	12	30	2.068	63	18	R	F	1	Psyc	1	6	-12.6125	0	1	1	0	3	0.12	0	0.0909091	0.1	0	0.3	58.0833	65.0417	6.95833
9	78	136	curved	1	3	10	3.749	82	18	R	F	1	Psyc	1	6	-12.6125	0	1	1	0	3	0.12	0	0.0909091	0.1	0	0.3	58.0833	65.0417	6.95833
9	79	104	curved	1	8	20	3.385	70	18	R	F	1	Psyc	1	6	-12.6125	0	1	1	0	3	0.12	0	0.0909091	0.1	0	0.3	58.0833	65.0417	6.95833
9	80	64	curved	1	3	10	1.006	83	18	R	F	1	Psyc	1	6	-12.6125	0	1	1	0	3	0.12	0	0.0909091	0.1	0	0.3	58.0833	65.0417	6.95833
9	81	83	curved	1	4	10	1.67	94	18	R	F	1	Psyc	1	6	-12.6125	0	1	1	0	3	0.12	0	0.0909091	0.1	0	0.3	58.0833	65.0417	6.95833
9	82	112	angular	0	6	20	1.291	71	18	R	F	1	Psyc	1	6	-12.6125	0	1	1	0	3	0.12	0	0.0909091	0.1	0	0.3	58.0833	65.0417	6.95833
9	83	102	curved	1	5	10	3.932	95	18	R	F	1	Psyc	1	6	-12.6125	0	1	1	0	3	0.12	0	0.0909091	0.1	0	0.3	58.0833	65.0417	6.95833
9	84	58	angular	0	6	20	3.435	77	18	R	F	1	Psyc	1	6	-12.6125	0	1	1	0	3	0.12	0	0.0909091	0.1	0	0.3	58.0833	65.0417	6.95833
9	85	80	angular	0	12	30	1.091	71	18	R	F	1	Psyc	1	6	-12.6125	0	1	1	0	3	0.12	0	0.0909091	0.1	0	0.3	58.0833	65.0417	6.95833
9	86	123	curved	1	10	20	1.805	87	18	R	F	1	Psyc	1	6	-12.6125	0	1	1	0	3	0.12	0	0.0909091	0.1	0	0.3	58.0833	65.0417	6.95833
9	87	25	angular	0	9	30	0.941	74	18	R	F	1	Psyc	1	6	-12.6125	0	1	1	0	3	0.12	0	0.0909091	0.1	0	0.3	58.0833	65.0417	6.95833
9	88	141	curved	1	10	20	1.323	92	18	R	F	1	Psyc	1	6	-12.6125	0	1	1	0	3	0.12	0	0.0909091	0.1	0	0.3	58.0833	65.0417	6.95833
9	89	79	angular	0	9	30	0.692	79	18	R	F	1	Psyc	1	6	-12.6125	0	1	1	0	3	0.12	0	0.0909091	0.1	0	0.3	58.0833	65.0417	6.95833
9	90	134	angular	0	12	30	1.157	49	18	R	F	1	Psyc	1	6	-12.6125	0	1	1	0	3	0.12	0	0.0909091	0.1	0	0.3	58.0833	65.0417	6.95833
9	91	48	curved	1	5	10	2.417	95	18	R	F	1	Psyc	1	6	-12.6125	0	1	1	0	3	0.12	0	0.0909091	0.1	0	0.3	58.0833	65.0417	6.95833
9	92	54	curved	1	15	30	2.653	87	18	R	F	1	Psyc	1	6	-12.6125	0	1	1	0	3	0.12	0	0.0909091	0.1	0	0.3	58.0833	65.0417	6.95833
9	93	15	curved	1	10	20	3.714	80	18	R	F	1	Psyc	1	6	-12.6125	0	1	1	0	3	0.12	0	0.0909091	0.1	0	0.3	58.0833	65.0417	6.95833
9	94	47	curved	1	4	10	0.97	87	18	R	F	1	Psyc	1	6	-12.6125	0	1	1	0	3	0.12	0	0.0909091	0.1	0	0.3	58.0833	65.0417	6.95833
9	95	89	curved	1	12	30	1.142	76	18	R	F	1	Psyc	1	6	-12.6125	0	1	1	0	3	0.12	0	0.0909091	0.1	0	0.3	58.0833	65.0417	6.95833
9	96	129	angular	0	5	10	4.713	91	18	R	F	1	Psyc	1	6	-12.6125	0	1	1	0	3	0.12	0	0.0909091	0.1	0	0.3	58.0833	65.0417	6.95833
9	97	26	angular	0	12	30	1.507	72	18	R	F	1	Psyc	1	6	-12.6125	0	1	1	0	3	0.12	0	0.0909091	0.1	0	0.3	58.0833	65.0417	6.95833
9	98	49	curved	1	6	20	1.751	53	18	R	F	1	Psyc	1	6	-12.6125	0	1	1	0	3	0.12	0	0.0909091	0.1	0	0.3	58.0833	65.0417	6.95833
9	99	42	angular	0	10	20	0.692	65	18	R	F	1	Psyc	1	6	-12.6125	0	1	1	0	3	0.12	0	0.0909091	0.1	0	0.3	58.0833	65.0417	6.95833
9	100	17	curved	1	12	30	3.285	67	18	R	F	1	Psyc	1	6	-12.6125	0	1	1	0	3	0.12	0	0.0909091	0.1	0	0.3	58.0833	65.0417	6.95833
9	101	103	curved	1	6	20	1.154	37	18	R	F	1	Psyc	1	6	-12.6125	0	1	1	0	3	0.12	0	0.0909091	0.1	0	0.3	58.0833	65.0417	6.95833
9	102	3	angular	0	5	10	2.937	90	18	R	F	1	Psyc	1	6	-12.6125	0	1	1	0	3	0.12	0	0.0909091	0.1	0	0.3	58.0833	65.0417	6.95833
9	103	7	angular	0	9	30	1.502	36	18	R	F	1	Psyc	1	6	-12.6125	0	1	1	0	3	0.12	0	0.0909091	0.1	0	0.3	58.0833	65.0417	6.95833
9	104	92	angular	0	4	10	1.724	53	18	R	F	1	Psyc	1	6	-12.6125	0	1	1	0	3	0.12	0	0.0909091	0.1	0	0.3	58.0833	65.0417	6.95833
9	105	116	angular	0	12	30	2.388	50	18	R	F	1	Psyc	1	6	-12.6125	0	1	1	0	3	0.12	0	0.0909091	0.1	0	0.3	58.0833	65.0417	6.95833
9	106	111	angular	0	5	10	2.037	39	18	R	F	1	Psyc	1	6	-12.6125	0	1	1	0	3	0.12	0	0.0909091	0.1	0	0.3	58.0833	65.0417	6.95833
9	107	63	angular	0	15	30	0.858	32	18	R	F	1	Psyc	1	6	-12.6125	0	1	1	0	3	0.12	0	0.0909091	0.1	0	0.3	58.0833	65.0417	6.95833
9	108	1	angular	0	3	10	0.688	20	18	R	F	1	Psyc	1	6	-12.6125	0	1	1	0	3	0.12	0	0.0909091	0.1	0	0.3	58.0833	65.0417	6.95833
9	109	130	angular	0	6	20	0.957	31	18	R	F	1	Psyc	1	6	-12.6125	0	1	1	0	3	0.12	0	0.0909091	0.1	0	0.3	58.0833	65.0417	6.95833
9	110	9	angular	0	15	30	1.872	52	18	R	F	1	Psyc	1	6	-12.6125	0	1	1	0	3	0.12	0	0.0909091	0.1	0	0.3	58.0833	65.0417	6.95833
9	111	74	angular	0	4	10	1.738	88	18	R	F	1	Psyc	1	6	-12.6125	0	1	1	0	3	0.12	0	0.0909091	0.1	0	0.3	58.0833	65.0417	6.95833
9	112	43	angular	0	9	30	0.989	42	18	R	F	1	Psyc	1	6	-12.6125	0	1	1	0	3	0.12	0	0.0909091	0.1	0	0.3	58.0833	65.0417	6.95833
9	113	13	curved	1	6	20	1.157	57	18	R	F	1	Psyc	1	6	-12.6125	0	1	1	0	3	0.12	0	0.0909091	0.1	0	0.3	58.0833	65.0417	6.95833
9	114	115	angular	0	9	30	0.907	47	18	R	F	1	Psyc	1	6	-12.6125	0	1	1	0	3	0.12	0	0.0909091	0.1	0	0.3	58.0833	65.0417	6.95833
9	115	105	curved	1	10	20	2.387	76	18	R	F	1	Psyc	1	6	-12.6125	0	1	1	0	3	0.12	0	0.0909091	0.1	0	0.3	58.0833	65.0417	6.95833
9	116	94	angular	0	6	20	1.922	55	18	R	F	1	Psyc	1	6	-12.6125	0	1	1	0	3	0.12	0	0.0909091	0.1	0	0.3	58.0833	65.0417	6.95833
9	117	20	angular	0	4	10	7.188	41	18	R	F	1	Psyc	1	6	-12.6125	0	1	1	0	3	0.12	0	0.0909091	0.1	0	0.3	58.0833	65.0417	6.95833
9	118	110	angular	0	4	10	1.723	30	18	R	F	1	Psyc	1	6	-12.6125	0	1	1	0	3	0.12	0	0.0909091	0.1	0	0.3	58.0833	65.0417	6.95833
9	119	6	angular	0	10	20	2.271	39	18	R	F	1	Psyc	1	6	-12.6125	0	1	1	0	3	0.12	0	0.0909091	0.1	0	0.3	58.0833	65.0417	6.95833
9	120	5	angular	0	8	20	5.697	25	18	R	F	1	Psyc	1	6	-12.6125	0	1	1	0	3	0.12	0	0.0909091	0.1	0	0.3	58.0833	65.0417	6.95833
9	121	37	angular	0	3	10	3.15	28	18	R	F	1	Psyc	1	6	-12.6125	0	1	1	0	3	0.12	0	0.0909091	0.1	0	0.3	58.0833	65.0417	6.95833
9	122	126	curved	1	15	30	0.922	33	18	R	F	1	Psyc	1	6	-12.6125	0	1	1	0	3	0.12	0	0.0909091	0.1	0	0.3	58.0833	65.0417	6.95833
9	123	11	curved	1	4	10	1.37	26	18	R	F	1	Psyc	1	6	-12.6125	0	1	1	0	3	0.12	0	0.0909091	0.1	0	0.3	58.0833	65.0417	6.95833
9	124	118	curved	1	3	10	2.719	44	18	R	F	1	Psyc	1	6	-12.6125	0	1	1	0	3	0.12	0	0.0909091	0.1	0	0.3	58.0833	65.0417	6.95833
9	125	96	angular	0	10	20	4.032	50	18	R	F	1	Psyc	1	6	-12.6125	0	1	1	0	3	0.12	0	0.0909091	0.1	0	0.3	58.0833	65.0417	6.95833
9	126	38	angular	0	4	10	1.619	47	18	R	F	1	Psyc	1	6	-12.6125	0	1	1	0	3	0.12	0	0.0909091	0.1	0	0.3	58.0833	65.0417	6.95833
9	127	50	curved	1	8	20	3.829	40	18	R	F	1	Psyc	1	6	-12.6125	0	1	1	0	3	0.12	0	0.0909091	0.1	0	0.3	58.0833	65.0417	6.95833
9	128	87	curved	1	10	20	1.224	35	18	R	F	1	Psyc	1	6	-12.6125	0	1	1	0	3	0.12	0	0.0909091	0.1	0	0.3	58.0833	65.0417	6.95833
9	129	133	angular	0	9	30	7.642	69	18	R	F	1	Psyc	1	6	-12.6125	0	1	1	0	3	0.12	0	0.0909091	0.1	0	0.3	58.0833	65.0417	6.95833
9	130	21	angular	0	5	10	1.888	57	18	R	F	1	Psyc	1	6	-12.6125	0	1	1	0	3	0.12	0	0.0909091	0.1	0	0.3	58.0833	65.0417	6.95833
9	131	93	angular	0	5	10	8.522	88	18	R	F	1	Psyc	1	6	-12.6125	0	1	1	0	3	0.12	0	0.0909091	0.1	0	0.3	58.0833	65.0417	6.95833
9	132	140	curved	1	8	20	0.674	80	18	R	F	1	Psyc	1	6	-12.6125	0	1	1	0	3	0.12	0	0.0909091	0.1	0	0.3	58.0833	65.0417	6.95833
9	133	66	curved	1	5	10	1.286	61	18	R	F	1	Psyc	1	6	-12.6125	0	1	1	0	3	0.12	0	0.0909091	0.1	0	0.3	58.0833	65.0417	6.95833
9	134	121	curved	1	6	20	2.801	36	18	R	F	1	Psyc	1	6	-12.6125	0	1	1	0	3	0.12	0	0.0909091	0.1	0	0.3	58.0833	65.0417	6.95833
9	135	67	curved	1	6	20	1.69	74	18	R	F	1	Psyc	1	6	-12.6125	0	1	1	0	3	0.12	0	0.0909091	0.1	0	0.3	58.0833	65.0417	6.95833
9	136	10	curved	1	3	10	1.005	56	18	R	F	1	Psyc	1	6	-12.6125	0	1	1	0	3	0.12	0	0.0909091	0.1	0	0.3	58.0833	65.0417	6.95833
9	137	14	curved	1	8	20	1.336	67	18	R	F	1	Psyc	1	6	-12.6125	0	1	1	0	3	0.12	0	0.0909091	0.1	0	0.3	58.0833	65.0417	6.95833
9	138	65	curved	1	4	10	3.286	55	18	R	F	1	Psyc	1	6	-12.6125	0	1	1	0	3	0.12	0	0.0909091	0.1	0	0.3	58.0833	65.0417	6.95833
9	139	33	curved	1	10	20	0.971	62	18	R	F	1	Psyc	1	6	-12.6125	0	1	1	0	3	0.12	0	0.0909091	0.1	0	0.3	58.0833	65.0417	6.95833
9	140	51	curved	1	10	20	1.773	76	18	R	F	1	Psyc	1	6	-12.6125	0	1	1	0	3	0.12	0	0.0909091	0.1	0	0.3	58.0833	65.0417	6.95833
9	141	32	curved	1	8	20	3.747	49	18	R	F	1	Psyc	1	6	-12.6125	0	1	1	0	3	0.12	0	0.0909091	0.1	0	0.3	58.0833	65.0417	6.95833
9	142	31	curved	1	6	20	1.339	31	18	R	F	1	Psyc	1	6	-12.6125	0	1	1	0	3	0.12	0	0.0909091	0.1	0	0.3	58.0833	65.0417	6.95833
9	143	95	angular	0	8	20	2.454	62	18	R	F	1	Psyc	1	6	-12.6125	0	1	1	0	3	0.12	0	0.0909091	0.1	0	0.3	58.0833	65.0417	6.95833
9	144	55	angular	0	3	10	2.885	81	18	R	F	1	Psyc	1	6	-12.6125	0	1	1	0	3	0.12	0	0.0909091	0.1	0	0.3	58.0833	65.0417	6.95833
10	1	22	angular	0	6	20	0.852	10	18	R	F	1	Psyc	1	10	-8.6125	1	1	8	0	0	0.2	0.0909091	0.0909091	0.8	0	0	39.5139	65.8611	26.3472
10	2	127	angular	0	3	10	1.289	10	18	R	F	1	Psyc	1	10	-8.6125	1	1	8	0	0	0.2	0.0909091	0.0909091	0.8	0	0	39.5139	65.8611	26.3472
10	3	56	angular	0	4	10	1.04	7	18	R	F	1	Psyc	1	10	-8.6125	1	1	8	0	0	0.2	0.0909091	0.0909091	0.8	0	0	39.5139	65.8611	26.3472
10	4	101	curved	1	4	10	0.773	30	18	R	F	1	Psyc	1	10	-8.6125	1	1	8	0	0	0.2	0.0909091	0.0909091	0.8	0	0	39.5139	65.8611	26.3472
10	5	61	angular	0	9	30	3.453	51	18	R	F	1	Psyc	1	10	-8.6125	1	1	8	0	0	0.2	0.0909091	0.0909091	0.8	0	0	39.5139	65.8611	26.3472
10	6	117	angular	0	15	30	1.091	69	18	R	F	1	Psyc	1	10	-8.6125	1	1	8	0	0	0.2	0.0909091	0.0909091	0.8	0	0	39.5139	65.8611	26.3472
10	7	68	curved	1	8	20	1.324	66	18	R	F	1	Psyc	1	10	-8.6125	1	1	8	0	0	0.2	0.0909091	0.0909091	0.8	0	0	39.5139	65.8611	26.3472
10	8	128	angular	0	4	10	0.738	18	18	R	F	1	Psyc	1	10	-8.6125	1	1	8	0	0	0.2	0.0909091	0.0909091	0.8	0	0	39.5139	65.8611	26.3472
10	9	60	angular	0	10	20	0.624	33	18	R	F	1	Psyc	1	10	-8.6125	1	1	8	0	0	0.2	0.0909091	0.0909091	0.8	0	0	39.5139	65.8611	26.3472
10	10	77	angular	0	8	20	0.472	77	18	R	F	1	Psyc	1	10	-8.6125	1	1	8	0	0	0.2	0.0909091	0.0909091	0.8	0	0	39.5139	65.8611	26.3472
10	11	122	curved	1	8	20	0.507	69	18	R	F	1	Psyc	1	10	-8.6125	1	1	8	0	0	0.2	0.0909091	0.0909091	0.8	0	0	39.5139	65.8611	26.3472
10	12	82	curved	1	3	10	0.507	42	18	R	F	1	Psyc	1	10	-8.6125	1	1	8	0	0	0.2	0.0909091	0.0909091	0.8	0	0	39.5139	65.8611	26.3472
10	13	44	angular	0	12	30	0.622	97	18	R	F	1	Psyc	1	10	-8.6125	1	1	8	0	0	0.2	0.0909091	0.0909091	0.8	0	0	39.5139	65.8611	26.3472
10	14	34	curved	1	9	30	0.607	100	18	R	F	1	Psyc	1	10	-8.6125	1	1	8	0	0	0.2	0.0909091	0.0909091	0.8	0	0	39.5139	65.8611	26.3472
10	15	97	angular	0	9	30	0.425	75	18	R	F	1	Psyc	1	10	-8.6125	1	1	8	0	0	0.2	0.0909091	0.0909091	0.8	0	0	39.5139	65.8611	26.3472
10	16	73	angular	0	3	10	0.406	23	18	R	F	1	Psyc	1	10	-8.6125	1	1	8	0	0	0.2	0.0909091	0.0909091	0.8	0	0	39.5139	65.8611	26.3472
10	17	28	curved	1	3	10	0.51	16	18	R	F	1	Psyc	1	10	-8.6125	1	1	8	0	0	0.2	0.0909091	0.0909091	0.8	0	0	39.5139	65.8611	26.3472
10	18	75	angular	0	5	10	0.723	58	18	R	F	1	Psyc	1	10	-8.6125	1	1	8	0	0	0.2	0.0909091	0.0909091	0.8	0	0	39.5139	65.8611	26.3472
10	19	40	angular	0	6	20	0.459	37	18	R	F	1	Psyc	1	10	-8.6125	1	1	8	0	0	0.2	0.0909091	0.0909091	0.8	0	0	39.5139	65.8611	26.3472
10	20	8	angular	0	12	30	0.44	95	18	R	F	1	Psyc	1	10	-8.6125	1	1	8	0	0	0.2	0.0909091	0.0909091	0.8	0	0	39.5139	65.8611	26.3472
10	21	24	angular	0	10	20	0.406	79	18	R	F	1	Psyc	1	10	-8.6125	1	1	8	0	0	0.2	0.0909091	0.0909091	0.8	0	0	39.5139	65.8611	26.3472
10	22	78	angular	0	10	20	0.491	58	18	R	F	1	Psyc	1	10	-8.6125	1	1	8	0	0	0.2	0.0909091	0.0909091	0.8	0	0	39.5139	65.8611	26.3472
10	23	137	curved	1	4	10	0.64	43	18	R	F	1	Psyc	1	10	-8.6125	1	1	8	0	0	0.2	0.0909091	0.0909091	0.8	0	0	39.5139	65.8611	26.3472
10	24	125	curved	1	12	30	0.706	95	18	R	F	1	Psyc	1	10	-8.6125	1	1	8	0	0	0.2	0.0909091	0.0909091	0.8	0	0	39.5139	65.8611	26.3472
10	25	4	angular	0	6	20	1.021	61	18	R	F	1	Psyc	1	10	-8.6125	1	1	8	0	0	0.2	0.0909091	0.0909091	0.8	0	0	39.5139	65.8611	26.3472
10	26	29	curved	1	4	10	0.542	72	18	R	F	1	Psyc	1	10	-8.6125	1	1	8	0	0	0.2	0.0909091	0.0909091	0.8	0	0	39.5139	65.8611	26.3472
10	27	16	curved	1	9	30	0.773	89	18	R	F	1	Psyc	1	10	-8.6125	1	1	8	0	0	0.2	0.0909091	0.0909091	0.8	0	0	39.5139	65.8611	26.3472
10	28	81	angular	0	15	30	1.255	73	18	R	F	1	Psyc	1	10	-8.6125	1	1	8	0	0	0.2	0.0909091	0.0909091	0.8	0	0	39.5139	65.8611	26.3472
10	29	138	curved	1	5	10	0.972	51	18	R	F	1	Psyc	1	10	-8.6125	1	1	8	0	0	0.2	0.0909091	0.0909091	0.8	0	0	39.5139	65.8611	26.3472
10	30	71	curved	1	12	30	0.771	79	18	R	F	1	Psyc	1	10	-8.6125	1	1	8	0	0	0.2	0.0909091	0.0909091	0.8	0	0	39.5139	65.8611	26.3472
10	31	62	angular	0	12	30	0.924	68	18	R	F	1	Psyc	1	10	-8.6125	1	1	8	0	0	0.2	0.0909091	0.0909091	0.8	0	0	39.5139	65.8611	26.3472
10	32	84	curved	1	5	10	0.623	75	18	R	F	1	Psyc	1	10	-8.6125	1	1	8	0	0	0.2	0.0909091	0.0909091	0.8	0	0	39.5139	65.8611	26.3472
10	33	52	curved	1	9	30	0.405	87	18	R	F	1	Psyc	1	10	-8.6125	1	1	8	0	0	0.2	0.0909091	0.0909091	0.8	0	0	39.5139	65.8611	26.3472
10	34	76	angular	0	6	20	0.404	30	18	R	F	1	Psyc	1	10	-8.6125	1	1	8	0	0	0.2	0.0909091	0.0909091	0.8	0	0	39.5139	65.8611	26.3472
10	35	27	angular	0	15	30	0.42	37	18	R	F	1	Psyc	1	10	-8.6125	1	1	8	0	0	0.2	0.0909091	0.0909091	0.8	0	0	39.5139	65.8611	26.3472
10	36	142	curved	1	9	30	0.821	84	18	R	F	1	Psyc	1	10	-8.6125	1	1	8	0	0	0.2	0.0909091	0.0909091	0.8	0	0	39.5139	65.8611	26.3472
10	37	86	curved	1	8	20	0.404	84	18	R	F	1	Psyc	1	10	-8.6125	1	1	8	0	0	0.2	0.0909091	0.0909091	0.8	0	0	39.5139	65.8611	26.3472
10	38	23	angular	0	8	20	1.008	31	18	R	F	1	Psyc	1	10	-8.6125	1	1	8	0	0	0.2	0.0909091	0.0909091	0.8	0	0	39.5139	65.8611	26.3472
10	39	139	curved	1	6	20	0.807	32	18	R	F	1	Psyc	1	10	-8.6125	1	1	8	0	0	0.2	0.0909091	0.0909091	0.8	0	0	39.5139	65.8611	26.3472
10	40	35	curved	1	12	30	0.503	83	18	R	F	1	Psyc	1	10	-8.6125	1	1	8	0	0	0.2	0.0909091	0.0909091	0.8	0	0	39.5139	65.8611	26.3472
10	41	12	curved	1	5	10	0.989	79	18	R	F	1	Psyc	1	10	-8.6125	1	1	8	0	0	0.2	0.0909091	0.0909091	0.8	0	0	39.5139	65.8611	26.3472
10	42	113	angular	0	8	20	0.936	23	18	R	F	1	Psyc	1	10	-8.6125	1	1	8	0	0	0.2	0.0909091	0.0909091	0.8	0	0	39.5139	65.8611	26.3472
10	43	120	curved	1	5	10	0.721	94	18	R	F	1	Psyc	1	10	-8.6125	1	1	8	0	0	0.2	0.0909091	0.0909091	0.8	0	0	39.5139	65.8611	26.3472
10	44	72	curved	1	15	30	0.786	93	18	R	F	1	Psyc	1	10	-8.6125	1	1	8	0	0	0.2	0.0909091	0.0909091	0.8	0	0	39.5139	65.8611	26.3472
10	45	99	angular	0	15	30	0.522	48	18	R	F	1	Psyc	1	10	-8.6125	1	1	8	0	0	0.2	0.0909091	0.0909091	0.8	0	0	39.5139	65.8611	26.3472
10	46	107	curved	1	12	30	1.038	89	18	R	F	1	Psyc	1	10	-8.6125	1	1	8	0	0	0.2	0.0909091	0.0909091	0.8	0	0	39.5139	65.8611	26.3472
10	47	131	angular	0	8	20	0.757	45	18	R	F	1	Psyc	1	10	-8.6125	1	1	8	0	0	0.2	0.0909091	0.0909091	0.8	0	0	39.5139	65.8611	26.3472
10	48	45	angular	0	15	30	1.288	53	18	R	F	1	Psyc	1	10	-8.6125	1	1	8	0	0	0.2	0.0909091	0.0909091	0.8	0	0	39.5139	65.8611	26.3472
10	49	106	curved	1	9	30	0.422	90	18	R	F	1	Psyc	1	10	-8.6125	1	1	8	0	0	0.2	0.0909091	0.0909091	0.8	0	0	39.5139	65.8611	26.3472
10	50	30	curved	1	5	10	0.476	93	18	R	F	1	Psyc	1	10	-8.6125	1	1	8	0	0	0.2	0.0909091	0.0909091	0.8	0	0	39.5139	65.8611	26.3472
10	51	18	curved	1	15	30	0.639	69	18	R	F	1	Psyc	1	10	-8.6125	1	1	8	0	0	0.2	0.0909091	0.0909091	0.8	0	0	39.5139	65.8611	26.3472
10	52	100	curved	1	3	10	0.522	40	18	R	F	1	Psyc	1	10	-8.6125	1	1	8	0	0	0.2	0.0909091	0.0909091	0.8	0	0	39.5139	65.8611	26.3472
10	53	36	curved	1	15	30	0.459	62	18	R	F	1	Psyc	1	10	-8.6125	1	1	8	0	0	0.2	0.0909091	0.0909091	0.8	0	0	39.5139	65.8611	26.3472
10	54	85	curved	1	6	20	0.408	53	18	R	F	1	Psyc	1	10	-8.6125	1	1	8	0	0	0.2	0.0909091	0.0909091	0.8	0	0	39.5139	65.8611	26.3472
10	55	132	angular	0	10	20	2.398	44	18	R	F	1	Psyc	1	10	-8.6125	1	1	8	0	0	0.2	0.0909091	0.0909091	0.8	0	0	39.5139	65.8611	26.3472
10	56	39	angular	0	5	10	0.407	12	18	R	F	1	Psyc	1	10	-8.6125	1	1	8	0	0	0.2	0.0909091	0.0909091	0.8	0	0	39.5139	65.8611	26.3472
10	57	119	curved	1	4	10	0.54	26	18	R	F	1	Psyc	1	10	-8.6125	1	1	8	0	0	0.2	0.0909091	0.0909091	0.8	0	0	39.5139	65.8611	26.3472
10	58	59	angular	0	8	20	0.404	36	18	R	F	1	Psyc	1	10	-8.6125	1	1	8	0	0	0.2	0.0909091	0.0909091	0.8	0	0	39.5139	65.8611	26.3472
10	59	90	curved	1	15	30	0.875	73	18	R	F	1	Psyc	1	10	-8.6125	1	1	8	0	0	0.2	0.0909091	0.0909091	0.8	0	0	39.5139	65.8611	26.3472
10	60	53	curved	1	12	30	0.934	86	18	R	F	1	Psyc	1	10	-8.6125	1	1	8	0	0	0.2	0.0909091	0.0909091	0.8	0	0	39.5139	65.8611	26.3472
10	61	98	angular	0	12	30	0.406	86	18	R	F	1	Psyc	1	10	-8.6125	1	1	8	0	0	0.2	0.0909091	0.0909091	0.8	0	0	39.5139	65.8611	26.3472
10	62	46	curved	1	3	10	0.407	25	18	R	F	1	Psyc	1	10	-8.6125	1	1	8	0	0	0.2	0.0909091	0.0909091	0.8	0	0	39.5139	65.8611	26.3472
10	63	108	curved	1	15	30	0.441	88	18	R	F	1	Psyc	1	10	-8.6125	1	1	8	0	0	0.2	0.0909091	0.0909091	0.8	0	0	39.5139	65.8611	26.3472
10	64	91	angular	0	3	10	0.706	33	18	R	F	1	Psyc	1	10	-8.6125	1	1	8	0	0	0.2	0.0909091	0.0909091	0.8	0	0	39.5139	65.8611	26.3472
10	65	19	angular	0	3	10	0.459	22	18	R	F	1	Psyc	1	10	-8.6125	1	1	8	0	0	0.2	0.0909091	0.0909091	0.8	0	0	39.5139	65.8611	26.3472
10	66	69	curved	1	10	20	0.906	76	18	R	F	1	Psyc	1	10	-8.6125	1	1	8	0	0	0.2	0.0909091	0.0909091	0.8	0	0	39.5139	65.8611	26.3472
10	67	144	curved	1	15	30	0.406	76	18	R	F	1	Psyc	1	10	-8.6125	1	1	8	0	0	0.2	0.0909091	0.0909091	0.8	0	0	39.5139	65.8611	26.3472
10	68	70	curved	1	9	30	0.407	76	18	R	F	1	Psyc	1	10	-8.6125	1	1	8	0	0	0.2	0.0909091	0.0909091	0.8	0	0	39.5139	65.8611	26.3472
10	69	57	angular	0	5	10	0.753	45	18	R	F	1	Psyc	1	10	-8.6125	1	1	8	0	0	0.2	0.0909091	0.0909091	0.8	0	0	39.5139	65.8611	26.3472
10	70	41	angular	0	8	20	0.852	31	18	R	F	1	Psyc	1	10	-8.6125	1	1	8	0	0	0.2	0.0909091	0.0909091	0.8	0	0	39.5139	65.8611	26.3472
10	71	135	angular	0	15	30	1.124	31	18	R	F	1	Psyc	1	10	-8.6125	1	1	8	0	0	0.2	0.0909091	0.0909091	0.8	0	0	39.5139	65.8611	26.3472
10	72	114	angular	0	10	20	0.558	31	18	R	F	1	Psyc	1	10	-8.6125	1	1	8	0	0	0.2	0.0909091	0.0909091	0.8	0	0	39.5139	65.8611	26.3472
10	73	124	curved	1	9	30	1.271	83	18	R	F	1	Psyc	1	10	-8.6125	1	1	8	0	0	0.2	0.0909091	0.0909091	0.8	0	0	39.5139	65.8611	26.3472
10	74	109	angular	0	3	10	2.982	42	18	R	F	1	Psyc	1	10	-8.6125	1	1	8	0	0	0.2	0.0909091	0.0909091	0.8	0	0	39.5139	65.8611	26.3472
10	75	88	curved	1	9	30	3.07	56	18	R	F	1	Psyc	1	10	-8.6125	1	1	8	0	0	0.2	0.0909091	0.0909091	0.8	0	0	39.5139	65.8611	26.3472
10	76	2	angular	0	4	10	0.773	20	18	R	F	1	Psyc	1	10	-8.6125	1	1	8	0	0	0.2	0.0909091	0.0909091	0.8	0	0	39.5139	65.8611	26.3472
10	77	143	curved	1	12	30	0.489	70	18	R	F	1	Psyc	1	10	-8.6125	1	1	8	0	0	0.2	0.0909091	0.0909091	0.8	0	0	39.5139	65.8611	26.3472
10	78	136	curved	1	3	10	0.404	32	18	R	F	1	Psyc	1	10	-8.6125	1	1	8	0	0	0.2	0.0909091	0.0909091	0.8	0	0	39.5139	65.8611	26.3472
10	79	104	curved	1	8	20	1.275	34	18	R	F	1	Psyc	1	10	-8.6125	1	1	8	0	0	0.2	0.0909091	0.0909091	0.8	0	0	39.5139	65.8611	26.3472
10	80	64	curved	1	3	10	0.404	22	18	R	F	1	Psyc	1	10	-8.6125	1	1	8	0	0	0.2	0.0909091	0.0909091	0.8	0	0	39.5139	65.8611	26.3472
10	81	83	curved	1	4	10	0.439	64	18	R	F	1	Psyc	1	10	-8.6125	1	1	8	0	0	0.2	0.0909091	0.0909091	0.8	0	0	39.5139	65.8611	26.3472
10	82	112	angular	0	6	20	0.473	23	18	R	F	1	Psyc	1	10	-8.6125	1	1	8	0	0	0.2	0.0909091	0.0909091	0.8	0	0	39.5139	65.8611	26.3472
10	83	102	curved	1	5	10	1.524	33	18	R	F	1	Psyc	1	10	-8.6125	1	1	8	0	0	0.2	0.0909091	0.0909091	0.8	0	0	39.5139	65.8611	26.3472
10	84	58	angular	0	6	20	2.006	18	18	R	F	1	Psyc	1	10	-8.6125	1	1	8	0	0	0.2	0.0909091	0.0909091	0.8	0	0	39.5139	65.8611	26.3472
10	85	80	angular	0	12	30	1.174	65	18	R	F	1	Psyc	1	10	-8.6125	1	1	8	0	0	0.2	0.0909091	0.0909091	0.8	0	0	39.5139	65.8611	26.3472
10	86	123	curved	1	10	20	1.339	57	18	R	F	1	Psyc	1	10	-8.6125	1	1	8	0	0	0.2	0.0909091	0.0909091	0.8	0	0	39.5139	65.8611	26.3472
10	87	25	angular	0	9	30	0.522	64	18	R	F	1	Psyc	1	10	-8.6125	1	1	8	0	0	0.2	0.0909091	0.0909091	0.8	0	0	39.5139	65.8611	26.3472
10	88	141	curved	1	10	20	0.719	83	18	R	F	1	Psyc	1	10	-8.6125	1	1	8	0	0	0.2	0.0909091	0.0909091	0.8	0	0	39.5139	65.8611	26.3472
10	89	79	angular	0	9	30	1.02	30	18	R	F	1	Psyc	1	10	-8.6125	1	1	8	0	0	0.2	0.0909091	0.0909091	0.8	0	0	39.5139	65.8611	26.3472
10	90	134	angular	0	12	30	3.048	36	18	R	F	1	Psyc	1	10	-8.6125	1	1	8	0	0	0.2	0.0909091	0.0909091	0.8	0	0	39.5139	65.8611	26.3472
10	91	48	curved	1	5	10	0.989	86	18	R	F	1	Psyc	1	10	-8.6125	1	1	8	0	0	0.2	0.0909091	0.0909091	0.8	0	0	39.5139	65.8611	26.3472
10	92	54	curved	1	15	30	3.104	93	18	R	F	1	Psyc	1	10	-8.6125	1	1	8	0	0	0.2	0.0909091	0.0909091	0.8	0	0	39.5139	65.8611	26.3472
10	93	15	curved	1	10	20	2.72	65	18	R	F	1	Psyc	1	10	-8.6125	1	1	8	0	0	0.2	0.0909091	0.0909091	0.8	0	0	39.5139	65.8611	26.3472
10	94	47	curved	1	4	10	1.655	65	18	R	F	1	Psyc	1	10	-8.6125	1	1	8	0	0	0.2	0.0909091	0.0909091	0.8	0	0	39.5139	65.8611	26.3472
10	95	89	curved	1	12	30	1.521	84	18	R	F	1	Psyc	1	10	-8.6125	1	1	8	0	0	0.2	0.0909091	0.0909091	0.8	0	0	39.5139	65.8611	26.3472
10	96	129	angular	0	5	10	0.973	70	18	R	F	1	Psyc	1	10	-8.6125	1	1	8	0	0	0.2	0.0909091	0.0909091	0.8	0	0	39.5139	65.8611	26.3472
10	97	26	angular	0	12	30	0.991	64	18	R	F	1	Psyc	1	10	-8.6125	1	1	8	0	0	0.2	0.0909091	0.0909091	0.8	0	0	39.5139	65.8611	26.3472
10	98	49	curved	1	6	20	2.567	52	18	R	F	1	Psyc	1	10	-8.6125	1	1	8	0	0	0.2	0.0909091	0.0909091	0.8	0	0	39.5139	65.8611	26.3472
10	99	42	angular	0	10	20	2.318	49	18	R	F	1	Psyc	1	10	-8.6125	1	1	8	0	0	0.2	0.0909091	0.0909091	0.8	0	0	39.5139	65.8611	26.3472
10	100	17	curved	1	12	30	0.791	92	18	R	F	1	Psyc	1	10	-8.6125	1	1	8	0	0	0.2	0.0909091	0.0909091	0.8	0	0	39.5139	65.8611	26.3472
10	101	103	curved	1	6	20	0.672	72	18	R	F	1	Psyc	1	10	-8.6125	1	1	8	0	0	0.2	0.0909091	0.0909091	0.8	0	0	39.5139	65.8611	26.3472
10	102	3	angular	0	5	10	0.439	25	18	R	F	1	Psyc	1	10	-8.6125	1	1	8	0	0	0.2	0.0909091	0.0909091	0.8	0	0	39.5139	65.8611	26.3472
10	103	7	angular	0	9	30	0.423	20	18	R	F	1	Psyc	1	10	-8.6125	1	1	8	0	0	0.2	0.0909091	0.0909091	0.8	0	0	39.5139	65.8611	26.3472
10	104	92	angular	0	4	10	1.108	17	18	R	F	1	Psyc	1	10	-8.6125	1	1	8	0	0	0.2	0.0909091	0.0909091	0.8	0	0	39.5139	65.8611	26.3472
10	105	116	angular	0	12	30	0.609	53	18	R	F	1	Psyc	1	10	-8.6125	1	1	8	0	0	0.2	0.0909091	0.0909091	0.8	0	0	39.5139	65.8611	26.3472
10	106	111	angular	0	5	10	0.405	27	18	R	F	1	Psyc	1	10	-8.6125	1	1	8	0	0	0.2	0.0909091	0.0909091	0.8	0	0	39.5139	65.8611	26.3472
10	107	63	angular	0	15	30	0.572	79	18	R	F	1	Psyc	1	10	-8.6125	1	1	8	0	0	0.2	0.0909091	0.0909091	0.8	0	0	39.5139	65.8611	26.3472
10	108	1	angular	0	3	10	0.67	27	18	R	F	1	Psyc	1	10	-8.6125	1	1	8	0	0	0.2	0.0909091	0.0909091	0.8	0	0	39.5139	65.8611	26.3472
10	109	130	angular	0	6	20	0.472	39	18	R	F	1	Psyc	1	10	-8.6125	1	1	8	0	0	0.2	0.0909091	0.0909091	0.8	0	0	39.5139	65.8611	26.3472
10	110	9	angular	0	15	30	0.771	87	18	R	F	1	Psyc	1	10	-8.6125	1	1	8	0	0	0.2	0.0909091	0.0909091	0.8	0	0	39.5139	65.8611	26.3472
10	111	74	angular	0	4	10	0.689	24	18	R	F	1	Psyc	1	10	-8.6125	1	1	8	0	0	0.2	0.0909091	0.0909091	0.8	0	0	39.5139	65.8611	26.3472
10	112	43	angular	0	9	30	0.404	32	18	R	F	1	Psyc	1	10	-8.6125	1	1	8	0	0	0.2	0.0909091	0.0909091	0.8	0	0	39.5139	65.8611	26.3472
10	113	13	curved	1	6	20	1.388	58	18	R	F	1	Psyc	1	10	-8.6125	1	1	8	0	0	0.2	0.0909091	0.0909091	0.8	0	0	39.5139	65.8611	26.3472
10	114	115	angular	0	9	30	0.874	46	18	R	F	1	Psyc	1	10	-8.6125	1	1	8	0	0	0.2	0.0909091	0.0909091	0.8	0	0	39.5139	65.8611	26.3472
10	115	105	curved	1	10	20	0.422	72	18	R	F	1	Psyc	1	10	-8.6125	1	1	8	0	0	0.2	0.0909091	0.0909091	0.8	0	0	39.5139	65.8611	26.3472
10	116	94	angular	0	6	20	0.407	42	18	R	F	1	Psyc	1	10	-8.6125	1	1	8	0	0	0.2	0.0909091	0.0909091	0.8	0	0	39.5139	65.8611	26.3472
10	117	20	angular	0	4	10	0.405	24	18	R	F	1	Psyc	1	10	-8.6125	1	1	8	0	0	0.2	0.0909091	0.0909091	0.8	0	0	39.5139	65.8611	26.3472
10	118	110	angular	0	4	10	0.419	8	18	R	F	1	Psyc	1	10	-8.6125	1	1	8	0	0	0.2	0.0909091	0.0909091	0.8	0	0	39.5139	65.8611	26.3472
10	119	6	angular	0	10	20	0.407	8	18	R	F	1	Psyc	1	10	-8.6125	1	1	8	0	0	0.2	0.0909091	0.0909091	0.8	0	0	39.5139	65.8611	26.3472
10	120	5	angular	0	8	20	0.505	32	18	R	F	1	Psyc	1	10	-8.6125	1	1	8	0	0	0.2	0.0909091	0.0909091	0.8	0	0	39.5139	65.8611	26.3472
10	121	37	angular	0	3	10	0.473	15	18	R	F	1	Psyc	1	10	-8.6125	1	1	8	0	0	0.2	0.0909091	0.0909091	0.8	0	0	39.5139	65.8611	26.3472
10	122	126	curved	1	15	30	0.44	91	18	R	F	1	Psyc	1	10	-8.6125	1	1	8	0	0	0.2	0.0909091	0.0909091	0.8	0	0	39.5139	65.8611	26.3472
10	123	11	curved	1	4	10	0.405	38	18	R	F	1	Psyc	1	10	-8.6125	1	1	8	0	0	0.2	0.0909091	0.0909091	0.8	0	0	39.5139	65.8611	26.3472
10	124	118	curved	1	3	10	0.405	31	18	R	F	1	Psyc	1	10	-8.6125	1	1	8	0	0	0.2	0.0909091	0.0909091	0.8	0	0	39.5139	65.8611	26.3472
10	125	96	angular	0	10	20	0.626	20	18	R	F	1	Psyc	1	10	-8.6125	1	1	8	0	0	0.2	0.0909091	0.0909091	0.8	0	0	39.5139	65.8611	26.3472
10	126	38	angular	0	4	10	0.554	13	18	R	F	1	Psyc	1	10	-8.6125	1	1	8	0	0	0.2	0.0909091	0.0909091	0.8	0	0	39.5139	65.8611	26.3472
10	127	50	curved	1	8	20	1.14	20	18	R	F	1	Psyc	1	10	-8.6125	1	1	8	0	0	0.2	0.0909091	0.0909091	0.8	0	0	39.5139	65.8611	26.3472
10	128	87	curved	1	10	20	0.906	78	18	R	F	1	Psyc	1	10	-8.6125	1	1	8	0	0	0.2	0.0909091	0.0909091	0.8	0	0	39.5139	65.8611	26.3472
10	129	133	angular	0	9	30	1.989	26	18	R	F	1	Psyc	1	10	-8.6125	1	1	8	0	0	0.2	0.0909091	0.0909091	0.8	0	0	39.5139	65.8611	26.3472
10	130	21	angular	0	5	10	0.509	14	18	R	F	1	Psyc	1	10	-8.6125	1	1	8	0	0	0.2	0.0909091	0.0909091	0.8	0	0	39.5139	65.8611	26.3472
10	131	93	angular	0	5	10	1.321	9	18	R	F	1	Psyc	1	10	-8.6125	1	1	8	0	0	0.2	0.0909091	0.0909091	0.8	0	0	39.5139	65.8611	26.3472
10	132	140	curved	1	8	20	0.474	9	18	R	F	1	Psyc	1	10	-8.6125	1	1	8	0	0	0.2	0.0909091	0.0909091	0.8	0	0	39.5139	65.8611	26.3472
10	133	66	curved	1	5	10	0.489	77	18	R	F	1	Psyc	1	10	-8.6125	1	1	8	0	0	0.2	0.0909091	0.0909091	0.8	0	0	39.5139	65.8611	26.3472
10	134	121	curved	1	6	20	0.771	76	18	R	F	1	Psyc	1	10	-8.6125	1	1	8	0	0	0.2	0.0909091	0.0909091	0.8	0	0	39.5139	65.8611	26.3472
10	135	67	curved	1	6	20	0.454	89	18	R	F	1	Psyc	1	10	-8.6125	1	1	8	0	0	0.2	0.0909091	0.0909091	0.8	0	0	39.5139	65.8611	26.3472
10	136	10	curved	1	3	10	0.488	37	18	R	F	1	Psyc	1	10	-8.6125	1	1	8	0	0	0.2	0.0909091	0.0909091	0.8	0	0	39.5139	65.8611	26.3472
10	137	14	curved	1	8	20	0.635	76	18	R	F	1	Psyc	1	10	-8.6125	1	1	8	0	0	0.2	0.0909091	0.0909091	0.8	0	0	39.5139	65.8611	26.3472
10	138	65	curved	1	4	10	1.075	76	18	R	F	1	Psyc	1	10	-8.6125	1	1	8	0	0	0.2	0.0909091	0.0909091	0.8	0	0	39.5139	65.8611	26.3472
10	139	33	curved	1	10	20	0.419	76	18	R	F	1	Psyc	1	10	-8.6125	1	1	8	0	0	0.2	0.0909091	0.0909091	0.8	0	0	39.5139	65.8611	26.3472
10	140	51	curved	1	10	20	0.406	85	18	R	F	1	Psyc	1	10	-8.6125	1	1	8	0	0	0.2	0.0909091	0.0909091	0.8	0	0	39.5139	65.8611	26.3472
10	141	32	curved	1	8	20	0.523	56	18	R	F	1	Psyc	1	10	-8.6125	1	1	8	0	0	0.2	0.0909091	0.0909091	0.8	0	0	39.5139	65.8611	26.3472
10	142	31	curved	1	6	20	0.439	69	18	R	F	1	Psyc	1	10	-8.6125	1	1	8	0	0	0.2	0.0909091	0.0909091	0.8	0	0	39.5139	65.8611	26.3472
10	143	95	angular	0	8	20	0.405	24	18	R	F	1	Psyc	1	10	-8.6125	1	1	8	0	0	0.2	0.0909091	0.0909091	0.8	0	0	39.5139	65.8611	26.3472
10	144	55	angular	0	3	10	1.502	16	18	R	F	1	Psyc	1	10	-8.6125	1	1	8	0	0	0.2	0.0909091	0.0909091	0.8	0	0	39.5139	65.8611	26.3472
11	1	22	angular	0	6	20	2.501	33	18	R	F	1	Psyc	1	22	3.3875	3	4	6	5	4	0.44	0.272727	0.363636	0.6	0.5	0.4	31.2778	54.5417	23.2639
11	2	127	angular	0	3	10	2.472	38	18	R	F	1	Psyc	1	22	3.3875	3	4	6	5	4	0.44	0.272727	0.363636	0.6	0.5	0.4	31.2778	54.5417	23.2639
11	3	56	angular	0	4	10	2.354	59	18	R	F	1	Psyc	1	22	3.3875	3	4	6	5	4	0.44	0.272727	0.363636	0.6	0.5	0.4	31.2778	54.5417	23.2639
11	4	101	curved	1	4	10	1.253	59	18	R	F	1	Psyc	1	22	3.3875	3	4	6	5	4	0.44	0.272727	0.363636	0.6	0.5	0.4	31.2778	54.5417	23.2639
11	5	61	angular	0	9	30	1.136	6	18	R	F	1	Psyc	1	22	3.3875	3	4	6	5	4	0.44	0.272727	0.363636	0.6	0.5	0.4	31.2778	54.5417	23.2639
11	6	117	angular	0	15	30	0.674	6	18	R	F	1	Psyc	1	22	3.3875	3	4	6	5	4	0.44	0.272727	0.363636	0.6	0.5	0.4	31.2778	54.5417	23.2639
11	7	68	curved	1	8	20	0.741	27	18	R	F	1	Psyc	1	22	3.3875	3	4	6	5	4	0.44	0.272727	0.363636	0.6	0.5	0.4	31.2778	54.5417	23.2639
11	8	128	angular	0	4	10	0.924	45	18	R	F	1	Psyc	1	22	3.3875	3	4	6	5	4	0.44	0.272727	0.363636	0.6	0.5	0.4	31.2778	54.5417	23.2639
11	9	60	angular	0	10	20	0.775	22	18	R	F	1	Psyc	1	22	3.3875	3	4	6	5	4	0.44	0.272727	0.363636	0.6	0.5	0.4	31.2778	54.5417	23.2639
11	10	77	angular	0	8	20	0.823	14	18	R	F	1	Psyc	1	22	3.3875	3	4	6	5	4	0.44	0.272727	0.363636	0.6	0.5	0.4	31.2778	54.5417	23.2639
11	11	122	curved	1	8	20	2.07	60	18	R	F	1	Psyc	1	22	3.3875	3	4	6	5	4	0.44	0.272727	0.363636	0.6	0.5	0.4	31.2778	54.5417	23.2639
11	12	82	curved	1	3	10	0.792	75	18	R	F	1	Psyc	1	22	3.3875	3	4	6	5	4	0.44	0.272727	0.363636	0.6	0.5	0.4	31.2778	54.5417	23.2639
11	13	44	angular	0	12	30	0.954	44	18	R	F	1	Psyc	1	22	3.3875	3	4	6	5	4	0.44	0.272727	0.363636	0.6	0.5	0.4	31.2778	54.5417	23.2639
11	14	34	curved	1	9	30	0.453	53	18	R	F	1	Psyc	1	22	3.3875	3	4	6	5	4	0.44	0.272727	0.363636	0.6	0.5	0.4	31.2778	54.5417	23.2639
11	15	97	angular	0	9	30	1.62	57	18	R	F	1	Psyc	1	22	3.3875	3	4	6	5	4	0.44	0.272727	0.363636	0.6	0.5	0.4	31.2778	54.5417	23.2639
11	16	73	angular	0	3	10	1.806	41	18	R	F	1	Psyc	1	22	3.3875	3	4	6	5	4	0.44	0.272727	0.363636	0.6	0.5	0.4	31.2778	54.5417	23.2639
11	17	28	curved	1	3	10	1.135	82	18	R	F	1	Psyc	1	22	3.3875	3	4	6	5	4	0.44	0.272727	0.363636	0.6	0.5	0.4	31.2778	54.5417	23.2639
11	18	75	angular	0	5	10	0.988	79	18	R	F	1	Psyc	1	22	3.3875	3	4	6	5	4	0.44	0.272727	0.363636	0.6	0.5	0.4	31.2778	54.5417	23.2639
11	19	40	angular	0	6	20	1.521	23	18	R	F	1	Psyc	1	22	3.3875	3	4	6	5	4	0.44	0.272727	0.363636	0.6	0.5	0.4	31.2778	54.5417	23.2639
11	20	8	angular	0	12	30	1.97	3	18	R	F	1	Psyc	1	22	3.3875	3	4	6	5	4	0.44	0.272727	0.363636	0.6	0.5	0.4	31.2778	54.5417	23.2639
11	21	24	angular	0	10	20	0.604	7	18	R	F	1	Psyc	1	22	3.3875	3	4	6	5	4	0.44	0.272727	0.363636	0.6	0.5	0.4	31.2778	54.5417	23.2639
11	22	78	angular	0	10	20	0.408	6	18	R	F	1	Psyc	1	22	3.3875	3	4	6	5	4	0.44	0.272727	0.363636	0.6	0.5	0.4	31.2778	54.5417	23.2639
11	23	137	curved	1	4	10	0.77	68	18	R	F	1	Psyc	1	22	3.3875	3	4	6	5	4	0.44	0.272727	0.363636	0.6	0.5	0.4	31.2778	54.5417	23.2639
11	24	125	curved	1	12	30	0.604	60	18	R	F	1	Psyc	1	22	3.3875	3	4	6	5	4	0.44	0.272727	0.363636	0.6	0.5	0.4	31.2778	54.5417	23.2639
11	25	4	angular	0	6	20	1.072	25	18	R	F	1	Psyc	1	22	3.3875	3	4	6	5	4	0.44	0.272727	0.363636	0.6	0.5	0.4	31.2778	54.5417	23.2639
11	26	29	curved	1	4	10	0.607	66	18	R	F	1	Psyc	1	22	3.3875	3	4	6	5	4	0.44	0.272727	0.363636	0.6	0.5	0.4	31.2778	54.5417	23.2639
11	27	16	curved	1	9	30	0.706	52	18	R	F	1	Psyc	1	22	3.3875	3	4	6	5	4	0.44	0.272727	0.363636	0.6	0.5	0.4	31.2778	54.5417	23.2639
11	28	81	angular	0	15	30	0.87	21	18	R	F	1	Psyc	1	22	3.3875	3	4	6	5	4	0.44	0.272727	0.363636	0.6	0.5	0.4	31.2778	54.5417	23.2639
11	29	138	curved	1	5	10	0.873	90	18	R	F	1	Psyc	1	22	3.3875	3	4	6	5	4	0.44	0.272727	0.363636	0.6	0.5	0.4	31.2778	54.5417	23.2639
11	30	71	curved	1	12	30	0.704	29	18	R	F	1	Psyc	1	22	3.3875	3	4	6	5	4	0.44	0.272727	0.363636	0.6	0.5	0.4	31.2778	54.5417	23.2639
11	31	62	angular	0	12	30	0.621	21	18	R	F	1	Psyc	1	22	3.3875	3	4	6	5	4	0.44	0.272727	0.363636	0.6	0.5	0.4	31.2778	54.5417	23.2639
11	32	84	curved	1	5	10	1.069	92	18	R	F	1	Psyc	1	22	3.3875	3	4	6	5	4	0.44	0.272727	0.363636	0.6	0.5	0.4	31.2778	54.5417	23.2639
11	33	52	curved	1	9	30	0.672	68	18	R	F	1	Psyc	1	22	3.3875	3	4	6	5	4	0.44	0.272727	0.363636	0.6	0.5	0.4	31.2778	54.5417	23.2639
11	34	76	angular	0	6	20	0.738	4	18	R	F	1	Psyc	1	22	3.3875	3	4	6	5	4	0.44	0.272727	0.363636	0.6	0.5	0.4	31.2778	54.5417	23.2639
11	35	27	angular	0	15	30	0.924	4	18	R	F	1	Psyc	1	22	3.3875	3	4	6	5	4	0.44	0.272727	0.363636	0.6	0.5	0.4	31.2778	54.5417	23.2639
11	36	142	curved	1	9	30	0.941	12	18	R	F	1	Psyc	1	22	3.3875	3	4	6	5	4	0.44	0.272727	0.363636	0.6	0.5	0.4	31.2778	54.5417	23.2639
11	37	86	curved	1	8	20	0.588	32	18	R	F	1	Psyc	1	22	3.3875	3	4	6	5	4	0.44	0.272727	0.363636	0.6	0.5	0.4	31.2778	54.5417	23.2639
11	38	23	angular	0	8	20	0.921	12	18	R	F	1	Psyc	1	22	3.3875	3	4	6	5	4	0.44	0.272727	0.363636	0.6	0.5	0.4	31.2778	54.5417	23.2639
11	39	139	curved	1	6	20	1.004	35	18	R	F	1	Psyc	1	22	3.3875	3	4	6	5	4	0.44	0.272727	0.363636	0.6	0.5	0.4	31.2778	54.5417	23.2639
11	40	35	curved	1	12	30	1.074	30	18	R	F	1	Psyc	1	22	3.3875	3	4	6	5	4	0.44	0.272727	0.363636	0.6	0.5	0.4	31.2778	54.5417	23.2639
11	41	12	curved	1	5	10	0.936	82	18	R	F	1	Psyc	1	22	3.3875	3	4	6	5	4	0.44	0.272727	0.363636	0.6	0.5	0.4	31.2778	54.5417	23.2639
11	42	113	angular	0	8	20	0.77	41	18	R	F	1	Psyc	1	22	3.3875	3	4	6	5	4	0.44	0.272727	0.363636	0.6	0.5	0.4	31.2778	54.5417	23.2639
11	43	120	curved	1	5	10	0.755	91	18	R	F	1	Psyc	1	22	3.3875	3	4	6	5	4	0.44	0.272727	0.363636	0.6	0.5	0.4	31.2778	54.5417	23.2639
11	44	72	curved	1	15	30	0.654	21	18	R	F	1	Psyc	1	22	3.3875	3	4	6	5	4	0.44	0.272727	0.363636	0.6	0.5	0.4	31.2778	54.5417	23.2639
11	45	99	angular	0	15	30	0.771	21	18	R	F	1	Psyc	1	22	3.3875	3	4	6	5	4	0.44	0.272727	0.363636	0.6	0.5	0.4	31.2778	54.5417	23.2639
11	46	107	curved	1	12	30	0.757	17	18	R	F	1	Psyc	1	22	3.3875	3	4	6	5	4	0.44	0.272727	0.363636	0.6	0.5	0.4	31.2778	54.5417	23.2639
11	47	131	angular	0	8	20	1.534	17	18	R	F	1	Psyc	1	22	3.3875	3	4	6	5	4	0.44	0.272727	0.363636	0.6	0.5	0.4	31.2778	54.5417	23.2639
11	48	45	angular	0	15	30	1.002	2	18	R	F	1	Psyc	1	22	3.3875	3	4	6	5	4	0.44	0.272727	0.363636	0.6	0.5	0.4	31.2778	54.5417	23.2639
11	49	106	curved	1	9	30	1.106	36	18	R	F	1	Psyc	1	22	3.3875	3	4	6	5	4	0.44	0.272727	0.363636	0.6	0.5	0.4	31.2778	54.5417	23.2639
11	50	30	curved	1	5	10	2.366	98	18	R	F	1	Psyc	1	22	3.3875	3	4	6	5	4	0.44	0.272727	0.363636	0.6	0.5	0.4	31.2778	54.5417	23.2639
11	51	18	curved	1	15	30	1.27	30	18	R	F	1	Psyc	1	22	3.3875	3	4	6	5	4	0.44	0.272727	0.363636	0.6	0.5	0.4	31.2778	54.5417	23.2639
11	52	100	curved	1	3	10	1.171	97	18	R	F	1	Psyc	1	22	3.3875	3	4	6	5	4	0.44	0.272727	0.363636	0.6	0.5	0.4	31.2778	54.5417	23.2639
11	53	36	curved	1	15	30	0.742	27	18	R	F	1	Psyc	1	22	3.3875	3	4	6	5	4	0.44	0.272727	0.363636	0.6	0.5	0.4	31.2778	54.5417	23.2639
11	54	85	curved	1	6	20	1.303	23	18	R	F	1	Psyc	1	22	3.3875	3	4	6	5	4	0.44	0.272727	0.363636	0.6	0.5	0.4	31.2778	54.5417	23.2639
11	55	132	angular	0	10	20	0.986	4	18	R	F	1	Psyc	1	22	3.3875	3	4	6	5	4	0.44	0.272727	0.363636	0.6	0.5	0.4	31.2778	54.5417	23.2639
11	56	39	angular	0	5	10	0.704	25	18	R	F	1	Psyc	1	22	3.3875	3	4	6	5	4	0.44	0.272727	0.363636	0.6	0.5	0.4	31.2778	54.5417	23.2639
11	57	119	curved	1	4	10	0.819	71	18	R	F	1	Psyc	1	22	3.3875	3	4	6	5	4	0.44	0.272727	0.363636	0.6	0.5	0.4	31.2778	54.5417	23.2639
11	58	59	angular	0	8	20	0.773	27	18	R	F	1	Psyc	1	22	3.3875	3	4	6	5	4	0.44	0.272727	0.363636	0.6	0.5	0.4	31.2778	54.5417	23.2639
11	59	90	curved	1	15	30	1.367	24	18	R	F	1	Psyc	1	22	3.3875	3	4	6	5	4	0.44	0.272727	0.363636	0.6	0.5	0.4	31.2778	54.5417	23.2639
11	60	53	curved	1	12	30	1.054	19	18	R	F	1	Psyc	1	22	3.3875	3	4	6	5	4	0.44	0.272727	0.363636	0.6	0.5	0.4	31.2778	54.5417	23.2639
11	61	98	angular	0	12	30	0.841	19	18	R	F	1	Psyc	1	22	3.3875	3	4	6	5	4	0.44	0.272727	0.363636	0.6	0.5	0.4	31.2778	54.5417	23.2639
11	62	46	curved	1	3	10	1.153	82	18	R	F	1	Psyc	1	22	3.3875	3	4	6	5	4	0.44	0.272727	0.363636	0.6	0.5	0.4	31.2778	54.5417	23.2639
11	63	108	curved	1	15	30	1.573	57	18	R	F	1	Psyc	1	22	3.3875	3	4	6	5	4	0.44	0.272727	0.363636	0.6	0.5	0.4	31.2778	54.5417	23.2639
11	64	91	angular	0	3	10	2.483	12	18	R	F	1	Psyc	1	22	3.3875	3	4	6	5	4	0.44	0.272727	0.363636	0.6	0.5	0.4	31.2778	54.5417	23.2639
11	65	19	angular	0	3	10	1.154	13	18	R	F	1	Psyc	1	22	3.3875	3	4	6	5	4	0.44	0.272727	0.363636	0.6	0.5	0.4	31.2778	54.5417	23.2639
11	66	69	curved	1	10	20	1.772	20	18	R	F	1	Psyc	1	22	3.3875	3	4	6	5	4	0.44	0.272727	0.363636	0.6	0.5	0.4	31.2778	54.5417	23.2639
11	67	144	curved	1	15	30	0.658	5	18	R	F	1	Psyc	1	22	3.3875	3	4	6	5	4	0.44	0.272727	0.363636	0.6	0.5	0.4	31.2778	54.5417	23.2639
11	68	70	curved	1	9	30	0.589	9	18	R	F	1	Psyc	1	22	3.3875	3	4	6	5	4	0.44	0.272727	0.363636	0.6	0.5	0.4	31.2778	54.5417	23.2639
11	69	57	angular	0	5	10	4.183	49	18	R	F	1	Psyc	1	22	3.3875	3	4	6	5	4	0.44	0.272727	0.363636	0.6	0.5	0.4	31.2778	54.5417	23.2639
11	70	41	angular	0	8	20	1.969	60	18	R	F	1	Psyc	1	22	3.3875	3	4	6	5	4	0.44	0.272727	0.363636	0.6	0.5	0.4	31.2778	54.5417	23.2639
11	71	135	angular	0	15	30	2.121	18	18	R	F	1	Psyc	1	22	3.3875	3	4	6	5	4	0.44	0.272727	0.363636	0.6	0.5	0.4	31.2778	54.5417	23.2639
11	72	114	angular	0	10	20	2.388	13	18	R	F	1	Psyc	1	22	3.3875	3	4	6	5	4	0.44	0.272727	0.363636	0.6	0.5	0.4	31.2778	54.5417	23.2639
11	73	124	curved	1	9	30	1.554	36	18	R	F	1	Psyc	1	22	3.3875	3	4	6	5	4	0.44	0.272727	0.363636	0.6	0.5	0.4	31.2778	54.5417	23.2639
11	74	109	angular	0	3	10	0.959	13	18	R	F	1	Psyc	1	22	3.3875	3	4	6	5	4	0.44	0.272727	0.363636	0.6	0.5	0.4	31.2778	54.5417	23.2639
11	75	88	curved	1	9	30	1.353	21	18	R	F	1	Psyc	1	22	3.3875	3	4	6	5	4	0.44	0.272727	0.363636	0.6	0.5	0.4	31.2778	54.5417	23.2639
11	76	2	angular	0	4	10	0.858	41	18	R	F	1	Psyc	1	22	3.3875	3	4	6	5	4	0.44	0.272727	0.363636	0.6	0.5	0.4	31.2778	54.5417	23.2639
11	77	143	curved	1	12	30	0.939	20	18	R	F	1	Psyc	1	22	3.3875	3	4	6	5	4	0.44	0.272727	0.363636	0.6	0.5	0.4	31.2778	54.5417	23.2639
11	78	136	curved	1	3	10	2.155	71	18	R	F	1	Psyc	1	22	3.3875	3	4	6	5	4	0.44	0.272727	0.363636	0.6	0.5	0.4	31.2778	54.5417	23.2639
11	79	104	curved	1	8	20	1.103	52	18	R	F	1	Psyc	1	22	3.3875	3	4	6	5	4	0.44	0.272727	0.363636	0.6	0.5	0.4	31.2778	54.5417	23.2639
11	80	64	curved	1	3	10	1.755	76	18	R	F	1	Psyc	1	22	3.3875	3	4	6	5	4	0.44	0.272727	0.363636	0.6	0.5	0.4	31.2778	54.5417	23.2639
11	81	83	curved	1	4	10	1.44	77	18	R	F	1	Psyc	1	22	3.3875	3	4	6	5	4	0.44	0.272727	0.363636	0.6	0.5	0.4	31.2778	54.5417	23.2639
11	82	112	angular	0	6	20	2.089	18	18	R	F	1	Psyc	1	22	3.3875	3	4	6	5	4	0.44	0.272727	0.363636	0.6	0.5	0.4	31.2778	54.5417	23.2639
11	83	102	curved	1	5	10	2.354	82	18	R	F	1	Psyc	1	22	3.3875	3	4	6	5	4	0.44	0.272727	0.363636	0.6	0.5	0.4	31.2778	54.5417	23.2639
11	84	58	angular	0	6	20	1.286	14	18	R	F	1	Psyc	1	22	3.3875	3	4	6	5	4	0.44	0.272727	0.363636	0.6	0.5	0.4	31.2778	54.5417	23.2639
11	85	80	angular	0	12	30	0.904	1	18	R	F	1	Psyc	1	22	3.3875	3	4	6	5	4	0.44	0.272727	0.363636	0.6	0.5	0.4	31.2778	54.5417	23.2639
11	86	123	curved	1	10	20	1.287	33	18	R	F	1	Psyc	1	22	3.3875	3	4	6	5	4	0.44	0.272727	0.363636	0.6	0.5	0.4	31.2778	54.5417	23.2639
11	87	25	angular	0	9	30	0.922	16	18	R	F	1	Psyc	1	22	3.3875	3	4	6	5	4	0.44	0.272727	0.363636	0.6	0.5	0.4	31.2778	54.5417	23.2639
11	88	141	curved	1	10	20	1.39	82	18	R	F	1	Psyc	1	22	3.3875	3	4	6	5	4	0.44	0.272727	0.363636	0.6	0.5	0.4	31.2778	54.5417	23.2639
11	89	79	angular	0	9	30	1.652	77	18	R	F	1	Psyc	1	22	3.3875	3	4	6	5	4	0.44	0.272727	0.363636	0.6	0.5	0.4	31.2778	54.5417	23.2639
11	90	134	angular	0	12	30	0.987	11	18	R	F	1	Psyc	1	22	3.3875	3	4	6	5	4	0.44	0.272727	0.363636	0.6	0.5	0.4	31.2778	54.5417	23.2639
11	91	48	curved	1	5	10	1.041	89	18	R	F	1	Psyc	1	22	3.3875	3	4	6	5	4	0.44	0.272727	0.363636	0.6	0.5	0.4	31.2778	54.5417	23.2639
11	92	54	curved	1	15	30	1.103	62	18	R	F	1	Psyc	1	22	3.3875	3	4	6	5	4	0.44	0.272727	0.363636	0.6	0.5	0.4	31.2778	54.5417	23.2639
11	93	15	curved	1	10	20	2.854	35	18	R	F	1	Psyc	1	22	3.3875	3	4	6	5	4	0.44	0.272727	0.363636	0.6	0.5	0.4	31.2778	54.5417	23.2639
11	94	47	curved	1	4	10	1.321	85	18	R	F	1	Psyc	1	22	3.3875	3	4	6	5	4	0.44	0.272727	0.363636	0.6	0.5	0.4	31.2778	54.5417	23.2639
11	95	89	curved	1	12	30	1.039	60	18	R	F	1	Psyc	1	22	3.3875	3	4	6	5	4	0.44	0.272727	0.363636	0.6	0.5	0.4	31.2778	54.5417	23.2639
11	96	129	angular	0	5	10	1.154	91	18	R	F	1	Psyc	1	22	3.3875	3	4	6	5	4	0.44	0.272727	0.363636	0.6	0.5	0.4	31.2778	54.5417	23.2639
11	97	26	angular	0	12	30	1.074	16	18	R	F	1	Psyc	1	22	3.3875	3	4	6	5	4	0.44	0.272727	0.363636	0.6	0.5	0.4	31.2778	54.5417	23.2639
11	98	49	curved	1	6	20	0.772	54	18	R	F	1	Psyc	1	22	3.3875	3	4	6	5	4	0.44	0.272727	0.363636	0.6	0.5	0.4	31.2778	54.5417	23.2639
11	99	42	angular	0	10	20	1.42	18	18	R	F	1	Psyc	1	22	3.3875	3	4	6	5	4	0.44	0.272727	0.363636	0.6	0.5	0.4	31.2778	54.5417	23.2639
11	100	17	curved	1	12	30	1.306	31	18	R	F	1	Psyc	1	22	3.3875	3	4	6	5	4	0.44	0.272727	0.363636	0.6	0.5	0.4	31.2778	54.5417	23.2639
11	101	103	curved	1	6	20	1.802	63	18	R	F	1	Psyc	1	22	3.3875	3	4	6	5	4	0.44	0.272727	0.363636	0.6	0.5	0.4	31.2778	54.5417	23.2639
11	102	3	angular	0	5	10	0.715	82	18	R	F	1	Psyc	1	22	3.3875	3	4	6	5	4	0.44	0.272727	0.363636	0.6	0.5	0.4	31.2778	54.5417	23.2639
11	103	7	angular	0	9	30	0.887	7	18	R	F	1	Psyc	1	22	3.3875	3	4	6	5	4	0.44	0.272727	0.363636	0.6	0.5	0.4	31.2778	54.5417	23.2639
11	104	92	angular	0	4	10	0.837	57	18	R	F	1	Psyc	1	22	3.3875	3	4	6	5	4	0.44	0.272727	0.363636	0.6	0.5	0.4	31.2778	54.5417	23.2639
11	105	116	angular	0	12	30	0.853	28	18	R	F	1	Psyc	1	22	3.3875	3	4	6	5	4	0.44	0.272727	0.363636	0.6	0.5	0.4	31.2778	54.5417	23.2639
11	106	111	angular	0	5	10	1.319	72	18	R	F	1	Psyc	1	22	3.3875	3	4	6	5	4	0.44	0.272727	0.363636	0.6	0.5	0.4	31.2778	54.5417	23.2639
11	107	63	angular	0	15	30	0.687	1	18	R	F	1	Psyc	1	22	3.3875	3	4	6	5	4	0.44	0.272727	0.363636	0.6	0.5	0.4	31.2778	54.5417	23.2639
11	108	1	angular	0	3	10	1.953	46	18	R	F	1	Psyc	1	22	3.3875	3	4	6	5	4	0.44	0.272727	0.363636	0.6	0.5	0.4	31.2778	54.5417	23.2639
11	109	130	angular	0	6	20	1.884	60	18	R	F	1	Psyc	1	22	3.3875	3	4	6	5	4	0.44	0.272727	0.363636	0.6	0.5	0.4	31.2778	54.5417	23.2639
11	110	9	angular	0	15	30	1.124	20	18	R	F	1	Psyc	1	22	3.3875	3	4	6	5	4	0.44	0.272727	0.363636	0.6	0.5	0.4	31.2778	54.5417	23.2639
11	111	74	angular	0	4	10	1.653	25	18	R	F	1	Psyc	1	22	3.3875	3	4	6	5	4	0.44	0.272727	0.363636	0.6	0.5	0.4	31.2778	54.5417	23.2639
11	112	43	angular	0	9	30	1.922	14	18	R	F	1	Psyc	1	22	3.3875	3	4	6	5	4	0.44	0.272727	0.363636	0.6	0.5	0.4	31.2778	54.5417	23.2639
11	113	13	curved	1	6	20	0.952	73	18	R	F	1	Psyc	1	22	3.3875	3	4	6	5	4	0.44	0.272727	0.363636	0.6	0.5	0.4	31.2778	54.5417	23.2639
11	114	115	angular	0	9	30	0.755	13	18	R	F	1	Psyc	1	22	3.3875	3	4	6	5	4	0.44	0.272727	0.363636	0.6	0.5	0.4	31.2778	54.5417	23.2639
11	115	105	curved	1	10	20	0.84	82	18	R	F	1	Psyc	1	22	3.3875	3	4	6	5	4	0.44	0.272727	0.363636	0.6	0.5	0.4	31.2778	54.5417	23.2639
11	116	94	angular	0	6	20	0.689	38	18	R	F	1	Psyc	1	22	3.3875	3	4	6	5	4	0.44	0.272727	0.363636	0.6	0.5	0.4	31.2778	54.5417	23.2639
11	117	20	angular	0	4	10	1.589	79	18	R	F	1	Psyc	1	22	3.3875	3	4	6	5	4	0.44	0.272727	0.363636	0.6	0.5	0.4	31.2778	54.5417	23.2639
11	118	110	angular	0	4	10	1.155	77	18	R	F	1	Psyc	1	22	3.3875	3	4	6	5	4	0.44	0.272727	0.363636	0.6	0.5	0.4	31.2778	54.5417	23.2639
11	119	6	angular	0	10	20	0.856	23	18	R	F	1	Psyc	1	22	3.3875	3	4	6	5	4	0.44	0.272727	0.363636	0.6	0.5	0.4	31.2778	54.5417	23.2639
11	120	5	angular	0	8	20	0.625	22	18	R	F	1	Psyc	1	22	3.3875	3	4	6	5	4	0.44	0.272727	0.363636	0.6	0.5	0.4	31.2778	54.5417	23.2639
11	121	37	angular	0	3	10	0.674	70	18	R	F	1	Psyc	1	22	3.3875	3	4	6	5	4	0.44	0.272727	0.363636	0.6	0.5	0.4	31.2778	54.5417	23.2639
11	122	126	curved	1	15	30	1.369	54	18	R	F	1	Psyc	1	22	3.3875	3	4	6	5	4	0.44	0.272727	0.363636	0.6	0.5	0.4	31.2778	54.5417	23.2639
11	123	11	curved	1	4	10	0.655	77	18	R	F	1	Psyc	1	22	3.3875	3	4	6	5	4	0.44	0.272727	0.363636	0.6	0.5	0.4	31.2778	54.5417	23.2639
11	124	118	curved	1	3	10	0.754	82	18	R	F	1	Psyc	1	22	3.3875	3	4	6	5	4	0.44	0.272727	0.363636	0.6	0.5	0.4	31.2778	54.5417	23.2639
11	125	96	angular	0	10	20	1.041	28	18	R	F	1	Psyc	1	22	3.3875	3	4	6	5	4	0.44	0.272727	0.363636	0.6	0.5	0.4	31.2778	54.5417	23.2639
11	126	38	angular	0	4	10	1.806	46	18	R	F	1	Psyc	1	22	3.3875	3	4	6	5	4	0.44	0.272727	0.363636	0.6	0.5	0.4	31.2778	54.5417	23.2639
11	127	50	curved	1	8	20	1.789	11	18	R	F	1	Psyc	1	22	3.3875	3	4	6	5	4	0.44	0.272727	0.363636	0.6	0.5	0.4	31.2778	54.5417	23.2639
11	128	87	curved	1	10	20	0.657	19	18	R	F	1	Psyc	1	22	3.3875	3	4	6	5	4	0.44	0.272727	0.363636	0.6	0.5	0.4	31.2778	54.5417	23.2639
11	129	133	angular	0	9	30	0.555	12	18	R	F	1	Psyc	1	22	3.3875	3	4	6	5	4	0.44	0.272727	0.363636	0.6	0.5	0.4	31.2778	54.5417	23.2639
11	130	21	angular	0	5	10	1.054	69	18	R	F	1	Psyc	1	22	3.3875	3	4	6	5	4	0.44	0.272727	0.363636	0.6	0.5	0.4	31.2778	54.5417	23.2639
11	131	93	angular	0	5	10	0.673	69	18	R	F	1	Psyc	1	22	3.3875	3	4	6	5	4	0.44	0.272727	0.363636	0.6	0.5	0.4	31.2778	54.5417	23.2639
11	132	140	curved	1	8	20	0.807	63	18	R	F	1	Psyc	1	22	3.3875	3	4	6	5	4	0.44	0.272727	0.363636	0.6	0.5	0.4	31.2778	54.5417	23.2639
11	133	66	curved	1	5	10	0.934	95	18	R	F	1	Psyc	1	22	3.3875	3	4	6	5	4	0.44	0.272727	0.363636	0.6	0.5	0.4	31.2778	54.5417	23.2639
11	134	121	curved	1	6	20	1.37	82	18	R	F	1	Psyc	1	22	3.3875	3	4	6	5	4	0.44	0.272727	0.363636	0.6	0.5	0.4	31.2778	54.5417	23.2639
11	135	67	curved	1	6	20	0.952	79	18	R	F	1	Psyc	1	22	3.3875	3	4	6	5	4	0.44	0.272727	0.363636	0.6	0.5	0.4	31.2778	54.5417	23.2639
11	136	10	curved	1	3	10	0.707	75	18	R	F	1	Psyc	1	22	3.3875	3	4	6	5	4	0.44	0.272727	0.363636	0.6	0.5	0.4	31.2778	54.5417	23.2639
11	137	14	curved	1	8	20	1.204	65	18	R	F	1	Psyc	1	22	3.3875	3	4	6	5	4	0.44	0.272727	0.363636	0.6	0.5	0.4	31.2778	54.5417	23.2639
11	138	65	curved	1	4	10	1.007	76	18	R	F	1	Psyc	1	22	3.3875	3	4	6	5	4	0.44	0.272727	0.363636	0.6	0.5	0.4	31.2778	54.5417	23.2639
11	139	33	curved	1	10	20	2.155	39	18	R	F	1	Psyc	1	22	3.3875	3	4	6	5	4	0.44	0.272727	0.363636	0.6	0.5	0.4	31.2778	54.5417	23.2639
11	140	51	curved	1	10	20	1.053	41	18	R	F	1	Psyc	1	22	3.3875	3	4	6	5	4	0.44	0.272727	0.363636	0.6	0.5	0.4	31.2778	54.5417	23.2639
11	141	32	curved	1	8	20	0.642	41	18	R	F	1	Psyc	1	22	3.3875	3	4	6	5	4	0.44	0.272727	0.363636	0.6	0.5	0.4	31.2778	54.5417	23.2639
11	142	31	curved	1	6	20	1.388	45	18	R	F	1	Psyc	1	22	3.3875	3	4	6	5	4	0.44	0.272727	0.363636	0.6	0.5	0.4	31.2778	54.5417	23.2639
11	143	95	angular	0	8	20	0.639	21	18	R	F	1	Psyc	1	22	3.3875	3	4	6	5	4	0.44	0.272727	0.363636	0.6	0.5	0.4	31.2778	54.5417	23.2639
11	144	55	angular	0	3	10	1.286	66	18	R	F	1	Psyc	1	22	3.3875	3	4	6	5	4	0.44	0.272727	0.363636	0.6	0.5	0.4	31.2778	54.5417	23.2639
12	1	22	angular	0	6	20	4.929	24	18	L	F	1	Psyc	1	13	-5.6125	3	4	3	2	1	0.26	0.272727	0.363636	0.3	0.2	0.1	39.6528	74.3889	34.7361
12	2	127	angular	0	3	10	2.586	21	18	L	F	1	Psyc	1	13	-5.6125	3	4	3	2	1	0.26	0.272727	0.363636	0.3	0.2	0.1	39.6528	74.3889	34.7361
12	3	56	angular	0	4	10	0.674	21	18	L	F	1	Psyc	1	13	-5.6125	3	4	3	2	1	0.26	0.272727	0.363636	0.3	0.2	0.1	39.6528	74.3889	34.7361
12	4	101	curved	1	4	10	1.203	45	18	L	F	1	Psyc	1	13	-5.6125	3	4	3	2	1	0.26	0.272727	0.363636	0.3	0.2	0.1	39.6528	74.3889	34.7361
12	5	61	angular	0	9	30	2.753	38	18	L	F	1	Psyc	1	13	-5.6125	3	4	3	2	1	0.26	0.272727	0.363636	0.3	0.2	0.1	39.6528	74.3889	34.7361
12	6	117	angular	0	15	30	1.806	34	18	L	F	1	Psyc	1	13	-5.6125	3	4	3	2	1	0.26	0.272727	0.363636	0.3	0.2	0.1	39.6528	74.3889	34.7361
12	7	68	curved	1	8	20	1.735	64	18	L	F	1	Psyc	1	13	-5.6125	3	4	3	2	1	0.26	0.272727	0.363636	0.3	0.2	0.1	39.6528	74.3889	34.7361
12	8	128	angular	0	4	10	2.355	57	18	L	F	1	Psyc	1	13	-5.6125	3	4	3	2	1	0.26	0.272727	0.363636	0.3	0.2	0.1	39.6528	74.3889	34.7361
12	9	60	angular	0	10	20	1.189	31	18	L	F	1	Psyc	1	13	-5.6125	3	4	3	2	1	0.26	0.272727	0.363636	0.3	0.2	0.1	39.6528	74.3889	34.7361
12	10	77	angular	0	8	20	1.353	43	18	L	F	1	Psyc	1	13	-5.6125	3	4	3	2	1	0.26	0.272727	0.363636	0.3	0.2	0.1	39.6528	74.3889	34.7361
12	11	122	curved	1	8	20	0.941	58	18	L	F	1	Psyc	1	13	-5.6125	3	4	3	2	1	0.26	0.272727	0.363636	0.3	0.2	0.1	39.6528	74.3889	34.7361
12	12	82	curved	1	3	10	1.071	76	18	L	F	1	Psyc	1	13	-5.6125	3	4	3	2	1	0.26	0.272727	0.363636	0.3	0.2	0.1	39.6528	74.3889	34.7361
12	13	44	angular	0	12	30	1.332	75	18	L	F	1	Psyc	1	13	-5.6125	3	4	3	2	1	0.26	0.272727	0.363636	0.3	0.2	0.1	39.6528	74.3889	34.7361
12	14	34	curved	1	9	30	1.003	83	18	L	F	1	Psyc	1	13	-5.6125	3	4	3	2	1	0.26	0.272727	0.363636	0.3	0.2	0.1	39.6528	74.3889	34.7361
12	15	97	angular	0	9	30	1.519	52	18	L	F	1	Psyc	1	13	-5.6125	3	4	3	2	1	0.26	0.272727	0.363636	0.3	0.2	0.1	39.6528	74.3889	34.7361
12	16	73	angular	0	3	10	1.486	46	18	L	F	1	Psyc	1	13	-5.6125	3	4	3	2	1	0.26	0.272727	0.363636	0.3	0.2	0.1	39.6528	74.3889	34.7361
12	17	28	curved	1	3	10	1.252	70	18	L	F	1	Psyc	1	13	-5.6125	3	4	3	2	1	0.26	0.272727	0.363636	0.3	0.2	0.1	39.6528	74.3889	34.7361
12	18	75	angular	0	5	10	1.188	62	18	L	F	1	Psyc	1	13	-5.6125	3	4	3	2	1	0.26	0.272727	0.363636	0.3	0.2	0.1	39.6528	74.3889	34.7361
12	19	40	angular	0	6	20	0.872	46	18	L	F	1	Psyc	1	13	-5.6125	3	4	3	2	1	0.26	0.272727	0.363636	0.3	0.2	0.1	39.6528	74.3889	34.7361
12	20	8	angular	0	12	30	1.187	57	18	L	F	1	Psyc	1	13	-5.6125	3	4	3	2	1	0.26	0.272727	0.363636	0.3	0.2	0.1	39.6528	74.3889	34.7361
12	21	24	angular	0	10	20	2.088	39	18	L	F	1	Psyc	1	13	-5.6125	3	4	3	2	1	0.26	0.272727	0.363636	0.3	0.2	0.1	39.6528	74.3889	34.7361
12	22	78	angular	0	10	20	0.907	35	18	L	F	1	Psyc	1	13	-5.6125	3	4	3	2	1	0.26	0.272727	0.363636	0.3	0.2	0.1	39.6528	74.3889	34.7361
12	23	137	curved	1	4	10	0.805	58	18	L	F	1	Psyc	1	13	-5.6125	3	4	3	2	1	0.26	0.272727	0.363636	0.3	0.2	0.1	39.6528	74.3889	34.7361
12	24	125	curved	1	12	30	1.967	79	18	L	F	1	Psyc	1	13	-5.6125	3	4	3	2	1	0.26	0.272727	0.363636	0.3	0.2	0.1	39.6528	74.3889	34.7361
12	25	4	angular	0	6	20	1.539	43	18	L	F	1	Psyc	1	13	-5.6125	3	4	3	2	1	0.26	0.272727	0.363636	0.3	0.2	0.1	39.6528	74.3889	34.7361
12	26	29	curved	1	4	10	1.087	56	18	L	F	1	Psyc	1	13	-5.6125	3	4	3	2	1	0.26	0.272727	0.363636	0.3	0.2	0.1	39.6528	74.3889	34.7361
12	27	16	curved	1	9	30	1.203	78	18	L	F	1	Psyc	1	13	-5.6125	3	4	3	2	1	0.26	0.272727	0.363636	0.3	0.2	0.1	39.6528	74.3889	34.7361
12	28	81	angular	0	15	30	0.885	65	18	L	F	1	Psyc	1	13	-5.6125	3	4	3	2	1	0.26	0.272727	0.363636	0.3	0.2	0.1	39.6528	74.3889	34.7361
12	29	138	curved	1	5	10	2.67	73	18	L	F	1	Psyc	1	13	-5.6125	3	4	3	2	1	0.26	0.272727	0.363636	0.3	0.2	0.1	39.6528	74.3889	34.7361
12	30	71	curved	1	12	30	1.089	86	18	L	F	1	Psyc	1	13	-5.6125	3	4	3	2	1	0.26	0.272727	0.363636	0.3	0.2	0.1	39.6528	74.3889	34.7361
12	31	62	angular	0	12	30	1.338	72	18	L	F	1	Psyc	1	13	-5.6125	3	4	3	2	1	0.26	0.272727	0.363636	0.3	0.2	0.1	39.6528	74.3889	34.7361
12	32	84	curved	1	5	10	1.769	89	18	L	F	1	Psyc	1	13	-5.6125	3	4	3	2	1	0.26	0.272727	0.363636	0.3	0.2	0.1	39.6528	74.3889	34.7361
12	33	52	curved	1	9	30	0.821	87	18	L	F	1	Psyc	1	13	-5.6125	3	4	3	2	1	0.26	0.272727	0.363636	0.3	0.2	0.1	39.6528	74.3889	34.7361
12	34	76	angular	0	6	20	1.274	55	18	L	F	1	Psyc	1	13	-5.6125	3	4	3	2	1	0.26	0.272727	0.363636	0.3	0.2	0.1	39.6528	74.3889	34.7361
12	35	27	angular	0	15	30	5.344	50	18	L	F	1	Psyc	1	13	-5.6125	3	4	3	2	1	0.26	0.272727	0.363636	0.3	0.2	0.1	39.6528	74.3889	34.7361
12	36	142	curved	1	9	30	1.536	80	18	L	F	1	Psyc	1	13	-5.6125	3	4	3	2	1	0.26	0.272727	0.363636	0.3	0.2	0.1	39.6528	74.3889	34.7361
12	37	86	curved	1	8	20	0.907	75	18	L	F	1	Psyc	1	13	-5.6125	3	4	3	2	1	0.26	0.272727	0.363636	0.3	0.2	0.1	39.6528	74.3889	34.7361
12	38	23	angular	0	8	20	1.556	57	18	L	F	1	Psyc	1	13	-5.6125	3	4	3	2	1	0.26	0.272727	0.363636	0.3	0.2	0.1	39.6528	74.3889	34.7361
12	39	139	curved	1	6	20	2.764	52	18	L	F	1	Psyc	1	13	-5.6125	3	4	3	2	1	0.26	0.272727	0.363636	0.3	0.2	0.1	39.6528	74.3889	34.7361
12	40	35	curved	1	12	30	1.852	72	18	L	F	1	Psyc	1	13	-5.6125	3	4	3	2	1	0.26	0.272727	0.363636	0.3	0.2	0.1	39.6528	74.3889	34.7361
12	41	12	curved	1	5	10	1.653	70	18	L	F	1	Psyc	1	13	-5.6125	3	4	3	2	1	0.26	0.272727	0.363636	0.3	0.2	0.1	39.6528	74.3889	34.7361
12	42	113	angular	0	8	20	1.086	43	18	L	F	1	Psyc	1	13	-5.6125	3	4	3	2	1	0.26	0.272727	0.363636	0.3	0.2	0.1	39.6528	74.3889	34.7361
12	43	120	curved	1	5	10	1.403	84	18	L	F	1	Psyc	1	13	-5.6125	3	4	3	2	1	0.26	0.272727	0.363636	0.3	0.2	0.1	39.6528	74.3889	34.7361
12	44	72	curved	1	15	30	0.888	91	18	L	F	1	Psyc	1	13	-5.6125	3	4	3	2	1	0.26	0.272727	0.363636	0.3	0.2	0.1	39.6528	74.3889	34.7361
12	45	99	angular	0	15	30	1.074	55	18	L	F	1	Psyc	1	13	-5.6125	3	4	3	2	1	0.26	0.272727	0.363636	0.3	0.2	0.1	39.6528	74.3889	34.7361
12	46	107	curved	1	12	30	0.655	69	18	L	F	1	Psyc	1	13	-5.6125	3	4	3	2	1	0.26	0.272727	0.363636	0.3	0.2	0.1	39.6528	74.3889	34.7361
12	47	131	angular	0	8	20	1.457	33	18	L	F	1	Psyc	1	13	-5.6125	3	4	3	2	1	0.26	0.272727	0.363636	0.3	0.2	0.1	39.6528	74.3889	34.7361
12	48	45	angular	0	15	30	2.92	27	18	L	F	1	Psyc	1	13	-5.6125	3	4	3	2	1	0.26	0.272727	0.363636	0.3	0.2	0.1	39.6528	74.3889	34.7361
12	49	106	curved	1	9	30	1.934	80	18	L	F	1	Psyc	1	13	-5.6125	3	4	3	2	1	0.26	0.272727	0.363636	0.3	0.2	0.1	39.6528	74.3889	34.7361
12	50	30	curved	1	5	10	0.805	87	18	L	F	1	Psyc	1	13	-5.6125	3	4	3	2	1	0.26	0.272727	0.363636	0.3	0.2	0.1	39.6528	74.3889	34.7361
12	51	18	curved	1	15	30	1.473	71	18	L	F	1	Psyc	1	13	-5.6125	3	4	3	2	1	0.26	0.272727	0.363636	0.3	0.2	0.1	39.6528	74.3889	34.7361
12	52	100	curved	1	3	10	1.586	87	18	L	F	1	Psyc	1	13	-5.6125	3	4	3	2	1	0.26	0.272727	0.363636	0.3	0.2	0.1	39.6528	74.3889	34.7361
12	53	36	curved	1	15	30	0.741	79	18	L	F	1	Psyc	1	13	-5.6125	3	4	3	2	1	0.26	0.272727	0.363636	0.3	0.2	0.1	39.6528	74.3889	34.7361
12	54	85	curved	1	6	20	0.821	77	18	L	F	1	Psyc	1	13	-5.6125	3	4	3	2	1	0.26	0.272727	0.363636	0.3	0.2	0.1	39.6528	74.3889	34.7361
12	55	132	angular	0	10	20	0.954	43	18	L	F	1	Psyc	1	13	-5.6125	3	4	3	2	1	0.26	0.272727	0.363636	0.3	0.2	0.1	39.6528	74.3889	34.7361
12	56	39	angular	0	5	10	0.854	63	18	L	F	1	Psyc	1	13	-5.6125	3	4	3	2	1	0.26	0.272727	0.363636	0.3	0.2	0.1	39.6528	74.3889	34.7361
12	57	119	curved	1	4	10	1.452	77	18	L	F	1	Psyc	1	13	-5.6125	3	4	3	2	1	0.26	0.272727	0.363636	0.3	0.2	0.1	39.6528	74.3889	34.7361
12	58	59	angular	0	8	20	1.074	36	18	L	F	1	Psyc	1	13	-5.6125	3	4	3	2	1	0.26	0.272727	0.363636	0.3	0.2	0.1	39.6528	74.3889	34.7361
12	59	90	curved	1	15	30	1.186	74	18	L	F	1	Psyc	1	13	-5.6125	3	4	3	2	1	0.26	0.272727	0.363636	0.3	0.2	0.1	39.6528	74.3889	34.7361
12	60	53	curved	1	12	30	1.09	78	18	L	F	1	Psyc	1	13	-5.6125	3	4	3	2	1	0.26	0.272727	0.363636	0.3	0.2	0.1	39.6528	74.3889	34.7361
12	61	98	angular	0	12	30	1.438	36	18	L	F	1	Psyc	1	13	-5.6125	3	4	3	2	1	0.26	0.272727	0.363636	0.3	0.2	0.1	39.6528	74.3889	34.7361
12	62	46	curved	1	3	10	2.219	70	18	L	F	1	Psyc	1	13	-5.6125	3	4	3	2	1	0.26	0.272727	0.363636	0.3	0.2	0.1	39.6528	74.3889	34.7361
12	63	108	curved	1	15	30	0.987	83	18	L	F	1	Psyc	1	13	-5.6125	3	4	3	2	1	0.26	0.272727	0.363636	0.3	0.2	0.1	39.6528	74.3889	34.7361
12	64	91	angular	0	3	10	1.54	29	18	L	F	1	Psyc	1	13	-5.6125	3	4	3	2	1	0.26	0.272727	0.363636	0.3	0.2	0.1	39.6528	74.3889	34.7361
12	65	19	angular	0	3	10	0.839	34	18	L	F	1	Psyc	1	13	-5.6125	3	4	3	2	1	0.26	0.272727	0.363636	0.3	0.2	0.1	39.6528	74.3889	34.7361
12	66	69	curved	1	10	20	1.023	63	18	L	F	1	Psyc	1	13	-5.6125	3	4	3	2	1	0.26	0.272727	0.363636	0.3	0.2	0.1	39.6528	74.3889	34.7361
12	67	144	curved	1	15	30	2.185	69	18	L	F	1	Psyc	1	13	-5.6125	3	4	3	2	1	0.26	0.272727	0.363636	0.3	0.2	0.1	39.6528	74.3889	34.7361
12	68	70	curved	1	9	30	1.485	81	18	L	F	1	Psyc	1	13	-5.6125	3	4	3	2	1	0.26	0.272727	0.363636	0.3	0.2	0.1	39.6528	74.3889	34.7361
12	69	57	angular	0	5	10	0.79	78	18	L	F	1	Psyc	1	13	-5.6125	3	4	3	2	1	0.26	0.272727	0.363636	0.3	0.2	0.1	39.6528	74.3889	34.7361
12	70	41	angular	0	8	20	1.155	21	18	L	F	1	Psyc	1	13	-5.6125	3	4	3	2	1	0.26	0.272727	0.363636	0.3	0.2	0.1	39.6528	74.3889	34.7361
12	71	135	angular	0	15	30	0.787	24	18	L	F	1	Psyc	1	13	-5.6125	3	4	3	2	1	0.26	0.272727	0.363636	0.3	0.2	0.1	39.6528	74.3889	34.7361
12	72	114	angular	0	10	20	0.624	31	18	L	F	1	Psyc	1	13	-5.6125	3	4	3	2	1	0.26	0.272727	0.363636	0.3	0.2	0.1	39.6528	74.3889	34.7361
12	73	124	curved	1	9	30	1.305	46	18	L	F	1	Psyc	1	13	-5.6125	3	4	3	2	1	0.26	0.272727	0.363636	0.3	0.2	0.1	39.6528	74.3889	34.7361
12	74	109	angular	0	3	10	2.172	42	18	L	F	1	Psyc	1	13	-5.6125	3	4	3	2	1	0.26	0.272727	0.363636	0.3	0.2	0.1	39.6528	74.3889	34.7361
12	75	88	curved	1	9	30	0.804	48	18	L	F	1	Psyc	1	13	-5.6125	3	4	3	2	1	0.26	0.272727	0.363636	0.3	0.2	0.1	39.6528	74.3889	34.7361
12	76	2	angular	0	4	10	0.904	60	18	L	F	1	Psyc	1	13	-5.6125	3	4	3	2	1	0.26	0.272727	0.363636	0.3	0.2	0.1	39.6528	74.3889	34.7361
12	77	143	curved	1	12	30	0.956	68	18	L	F	1	Psyc	1	13	-5.6125	3	4	3	2	1	0.26	0.272727	0.363636	0.3	0.2	0.1	39.6528	74.3889	34.7361
12	78	136	curved	1	3	10	1.235	91	18	L	F	1	Psyc	1	13	-5.6125	3	4	3	2	1	0.26	0.272727	0.363636	0.3	0.2	0.1	39.6528	74.3889	34.7361
12	79	104	curved	1	8	20	1.254	83	18	L	F	1	Psyc	1	13	-5.6125	3	4	3	2	1	0.26	0.272727	0.363636	0.3	0.2	0.1	39.6528	74.3889	34.7361
12	80	64	curved	1	3	10	1.767	79	18	L	F	1	Psyc	1	13	-5.6125	3	4	3	2	1	0.26	0.272727	0.363636	0.3	0.2	0.1	39.6528	74.3889	34.7361
12	81	83	curved	1	4	10	2.818	82	18	L	F	1	Psyc	1	13	-5.6125	3	4	3	2	1	0.26	0.272727	0.363636	0.3	0.2	0.1	39.6528	74.3889	34.7361
12	82	112	angular	0	6	20	1.34	32	18	L	F	1	Psyc	1	13	-5.6125	3	4	3	2	1	0.26	0.272727	0.363636	0.3	0.2	0.1	39.6528	74.3889	34.7361
12	83	102	curved	1	5	10	1.504	78	18	L	F	1	Psyc	1	13	-5.6125	3	4	3	2	1	0.26	0.272727	0.363636	0.3	0.2	0.1	39.6528	74.3889	34.7361
12	84	58	angular	0	6	20	1.305	23	18	L	F	1	Psyc	1	13	-5.6125	3	4	3	2	1	0.26	0.272727	0.363636	0.3	0.2	0.1	39.6528	74.3889	34.7361
12	85	80	angular	0	12	30	0.641	25	18	L	F	1	Psyc	1	13	-5.6125	3	4	3	2	1	0.26	0.272727	0.363636	0.3	0.2	0.1	39.6528	74.3889	34.7361
12	86	123	curved	1	10	20	2.038	67	18	L	F	1	Psyc	1	13	-5.6125	3	4	3	2	1	0.26	0.272727	0.363636	0.3	0.2	0.1	39.6528	74.3889	34.7361
12	87	25	angular	0	9	30	1.538	34	18	L	F	1	Psyc	1	13	-5.6125	3	4	3	2	1	0.26	0.272727	0.363636	0.3	0.2	0.1	39.6528	74.3889	34.7361
12	88	141	curved	1	10	20	0.689	54	18	L	F	1	Psyc	1	13	-5.6125	3	4	3	2	1	0.26	0.272727	0.363636	0.3	0.2	0.1	39.6528	74.3889	34.7361
12	89	79	angular	0	9	30	2.089	32	18	L	F	1	Psyc	1	13	-5.6125	3	4	3	2	1	0.26	0.272727	0.363636	0.3	0.2	0.1	39.6528	74.3889	34.7361
12	90	134	angular	0	12	30	0.855	25	18	L	F	1	Psyc	1	13	-5.6125	3	4	3	2	1	0.26	0.272727	0.363636	0.3	0.2	0.1	39.6528	74.3889	34.7361
12	91	48	curved	1	5	10	1.021	75	18	L	F	1	Psyc	1	13	-5.6125	3	4	3	2	1	0.26	0.272727	0.363636	0.3	0.2	0.1	39.6528	74.3889	34.7361
12	92	54	curved	1	15	30	0.671	59	18	L	F	1	Psyc	1	13	-5.6125	3	4	3	2	1	0.26	0.272727	0.363636	0.3	0.2	0.1	39.6528	74.3889	34.7361
12	93	15	curved	1	10	20	0.887	81	18	L	F	1	Psyc	1	13	-5.6125	3	4	3	2	1	0.26	0.272727	0.363636	0.3	0.2	0.1	39.6528	74.3889	34.7361
12	94	47	curved	1	4	10	0.971	83	18	L	F	1	Psyc	1	13	-5.6125	3	4	3	2	1	0.26	0.272727	0.363636	0.3	0.2	0.1	39.6528	74.3889	34.7361
12	95	89	curved	1	12	30	0.875	83	18	L	F	1	Psyc	1	13	-5.6125	3	4	3	2	1	0.26	0.272727	0.363636	0.3	0.2	0.1	39.6528	74.3889	34.7361
12	96	129	angular	0	5	10	0.407	83	18	L	F	1	Psyc	1	13	-5.6125	3	4	3	2	1	0.26	0.272727	0.363636	0.3	0.2	0.1	39.6528	74.3889	34.7361
12	97	26	angular	0	12	30	0.737	19	18	L	F	1	Psyc	1	13	-5.6125	3	4	3	2	1	0.26	0.272727	0.363636	0.3	0.2	0.1	39.6528	74.3889	34.7361
12	98	49	curved	1	6	20	1.121	59	18	L	F	1	Psyc	1	13	-5.6125	3	4	3	2	1	0.26	0.272727	0.363636	0.3	0.2	0.1	39.6528	74.3889	34.7361
12	99	42	angular	0	10	20	0.756	33	18	L	F	1	Psyc	1	13	-5.6125	3	4	3	2	1	0.26	0.272727	0.363636	0.3	0.2	0.1	39.6528	74.3889	34.7361
12	100	17	curved	1	12	30	1.07	71	18	L	F	1	Psyc	1	13	-5.6125	3	4	3	2	1	0.26	0.272727	0.363636	0.3	0.2	0.1	39.6528	74.3889	34.7361
12	101	103	curved	1	6	20	0.505	72	18	L	F	1	Psyc	1	13	-5.6125	3	4	3	2	1	0.26	0.272727	0.363636	0.3	0.2	0.1	39.6528	74.3889	34.7361
12	102	3	angular	0	5	10	1.87	68	18	L	F	1	Psyc	1	13	-5.6125	3	4	3	2	1	0.26	0.272727	0.363636	0.3	0.2	0.1	39.6528	74.3889	34.7361
12	103	7	angular	0	9	30	1.157	28	18	L	F	1	Psyc	1	13	-5.6125	3	4	3	2	1	0.26	0.272727	0.363636	0.3	0.2	0.1	39.6528	74.3889	34.7361
12	104	92	angular	0	4	10	1.054	51	18	L	F	1	Psyc	1	13	-5.6125	3	4	3	2	1	0.26	0.272727	0.363636	0.3	0.2	0.1	39.6528	74.3889	34.7361
12	105	116	angular	0	12	30	2.318	27	18	L	F	1	Psyc	1	13	-5.6125	3	4	3	2	1	0.26	0.272727	0.363636	0.3	0.2	0.1	39.6528	74.3889	34.7361
12	106	111	angular	0	5	10	2.7	46	18	L	F	1	Psyc	1	13	-5.6125	3	4	3	2	1	0.26	0.272727	0.363636	0.3	0.2	0.1	39.6528	74.3889	34.7361
12	107	63	angular	0	15	30	1.619	18	18	L	F	1	Psyc	1	13	-5.6125	3	4	3	2	1	0.26	0.272727	0.363636	0.3	0.2	0.1	39.6528	74.3889	34.7361
12	108	1	angular	0	3	10	6.877	33	18	L	F	1	Psyc	1	13	-5.6125	3	4	3	2	1	0.26	0.272727	0.363636	0.3	0.2	0.1	39.6528	74.3889	34.7361
12	109	130	angular	0	6	20	0.904	17	18	L	F	1	Psyc	1	13	-5.6125	3	4	3	2	1	0.26	0.272727	0.363636	0.3	0.2	0.1	39.6528	74.3889	34.7361
12	110	9	angular	0	15	30	0.638	11	18	L	F	1	Psyc	1	13	-5.6125	3	4	3	2	1	0.26	0.272727	0.363636	0.3	0.2	0.1	39.6528	74.3889	34.7361
12	111	74	angular	0	4	10	2.171	56	18	L	F	1	Psyc	1	13	-5.6125	3	4	3	2	1	0.26	0.272727	0.363636	0.3	0.2	0.1	39.6528	74.3889	34.7361
12	112	43	angular	0	9	30	0.741	22	18	L	F	1	Psyc	1	13	-5.6125	3	4	3	2	1	0.26	0.272727	0.363636	0.3	0.2	0.1	39.6528	74.3889	34.7361
12	113	13	curved	1	6	20	0.723	76	18	L	F	1	Psyc	1	13	-5.6125	3	4	3	2	1	0.26	0.272727	0.363636	0.3	0.2	0.1	39.6528	74.3889	34.7361
12	114	115	angular	0	9	30	1.274	18	18	L	F	1	Psyc	1	13	-5.6125	3	4	3	2	1	0.26	0.272727	0.363636	0.3	0.2	0.1	39.6528	74.3889	34.7361
12	115	105	curved	1	10	20	0.753	65	18	L	F	1	Psyc	1	13	-5.6125	3	4	3	2	1	0.26	0.272727	0.363636	0.3	0.2	0.1	39.6528	74.3889	34.7361
12	116	94	angular	0	6	20	1.539	21	18	L	F	1	Psyc	1	13	-5.6125	3	4	3	2	1	0.26	0.272727	0.363636	0.3	0.2	0.1	39.6528	74.3889	34.7361
12	117	20	angular	0	4	10	0.956	50	18	L	F	1	Psyc	1	13	-5.6125	3	4	3	2	1	0.26	0.272727	0.363636	0.3	0.2	0.1	39.6528	74.3889	34.7361
12	118	110	angular	0	4	10	0.923	49	18	L	F	1	Psyc	1	13	-5.6125	3	4	3	2	1	0.26	0.272727	0.363636	0.3	0.2	0.1	39.6528	74.3889	34.7361
12	119	6	angular	0	10	20	0.738	21	18	L	F	1	Psyc	1	13	-5.6125	3	4	3	2	1	0.26	0.272727	0.363636	0.3	0.2	0.1	39.6528	74.3889	34.7361
12	120	5	angular	0	8	20	0.41	16	18	L	F	1	Psyc	1	13	-5.6125	3	4	3	2	1	0.26	0.272727	0.363636	0.3	0.2	0.1	39.6528	74.3889	34.7361
12	121	37	angular	0	3	10	0.869	54	18	L	F	1	Psyc	1	13	-5.6125	3	4	3	2	1	0.26	0.272727	0.363636	0.3	0.2	0.1	39.6528	74.3889	34.7361
12	122	126	curved	1	15	30	0.738	61	18	L	F	1	Psyc	1	13	-5.6125	3	4	3	2	1	0.26	0.272727	0.363636	0.3	0.2	0.1	39.6528	74.3889	34.7361
12	123	11	curved	1	4	10	0.637	74	18	L	F	1	Psyc	1	13	-5.6125	3	4	3	2	1	0.26	0.272727	0.363636	0.3	0.2	0.1	39.6528	74.3889	34.7361
12	124	118	curved	1	3	10	1.854	74	18	L	F	1	Psyc	1	13	-5.6125	3	4	3	2	1	0.26	0.272727	0.363636	0.3	0.2	0.1	39.6528	74.3889	34.7361
12	125	96	angular	0	10	20	0.971	29	18	L	F	1	Psyc	1	13	-5.6125	3	4	3	2	1	0.26	0.272727	0.363636	0.3	0.2	0.1	39.6528	74.3889	34.7361
12	126	38	angular	0	4	10	0.74	45	18	L	F	1	Psyc	1	13	-5.6125	3	4	3	2	1	0.26	0.272727	0.363636	0.3	0.2	0.1	39.6528	74.3889	34.7361
12	127	50	curved	1	8	20	0.989	49	18	L	F	1	Psyc	1	13	-5.6125	3	4	3	2	1	0.26	0.272727	0.363636	0.3	0.2	0.1	39.6528	74.3889	34.7361
12	128	87	curved	1	10	20	1.339	59	18	L	F	1	Psyc	1	13	-5.6125	3	4	3	2	1	0.26	0.272727	0.363636	0.3	0.2	0.1	39.6528	74.3889	34.7361
12	129	133	angular	0	9	30	1.055	32	18	L	F	1	Psyc	1	13	-5.6125	3	4	3	2	1	0.26	0.272727	0.363636	0.3	0.2	0.1	39.6528	74.3889	34.7361
12	130	21	angular	0	5	10	1.551	25	18	L	F	1	Psyc	1	13	-5.6125	3	4	3	2	1	0.26	0.272727	0.363636	0.3	0.2	0.1	39.6528	74.3889	34.7361
12	131	93	angular	0	5	10	1.057	57	18	L	F	1	Psyc	1	13	-5.6125	3	4	3	2	1	0.26	0.272727	0.363636	0.3	0.2	0.1	39.6528	74.3889	34.7361
12	132	140	curved	1	8	20	0.688	78	18	L	F	1	Psyc	1	13	-5.6125	3	4	3	2	1	0.26	0.272727	0.363636	0.3	0.2	0.1	39.6528	74.3889	34.7361
12	133	66	curved	1	5	10	0.605	80	18	L	F	1	Psyc	1	13	-5.6125	3	4	3	2	1	0.26	0.272727	0.363636	0.3	0.2	0.1	39.6528	74.3889	34.7361
12	134	121	curved	1	6	20	0.954	87	18	L	F	1	Psyc	1	13	-5.6125	3	4	3	2	1	0.26	0.272727	0.363636	0.3	0.2	0.1	39.6528	74.3889	34.7361
12	135	67	curved	1	6	20	0.655	88	18	L	F	1	Psyc	1	13	-5.6125	3	4	3	2	1	0.26	0.272727	0.363636	0.3	0.2	0.1	39.6528	74.3889	34.7361
12	136	10	curved	1	3	10	0.705	87	18	L	F	1	Psyc	1	13	-5.6125	3	4	3	2	1	0.26	0.272727	0.363636	0.3	0.2	0.1	39.6528	74.3889	34.7361
12	137	14	curved	1	8	20	0.754	91	18	L	F	1	Psyc	1	13	-5.6125	3	4	3	2	1	0.26	0.272727	0.363636	0.3	0.2	0.1	39.6528	74.3889	34.7361
12	138	65	curved	1	4	10	0.771	88	18	L	F	1	Psyc	1	13	-5.6125	3	4	3	2	1	0.26	0.272727	0.363636	0.3	0.2	0.1	39.6528	74.3889	34.7361
12	139	33	curved	1	10	20	1.085	85	18	L	F	1	Psyc	1	13	-5.6125	3	4	3	2	1	0.26	0.272727	0.363636	0.3	0.2	0.1	39.6528	74.3889	34.7361
12	140	51	curved	1	10	20	0.406	88	18	L	F	1	Psyc	1	13	-5.6125	3	4	3	2	1	0.26	0.272727	0.363636	0.3	0.2	0.1	39.6528	74.3889	34.7361
12	141	32	curved	1	8	20	1.353	88	18	L	F	1	Psyc	1	13	-5.6125	3	4	3	2	1	0.26	0.272727	0.363636	0.3	0.2	0.1	39.6528	74.3889	34.7361
12	142	31	curved	1	6	20	0.755	88	18	L	F	1	Psyc	1	13	-5.6125	3	4	3	2	1	0.26	0.272727	0.363636	0.3	0.2	0.1	39.6528	74.3889	34.7361
12	143	95	angular	0	8	20	0.837	50	18	L	F	1	Psyc	1	13	-5.6125	3	4	3	2	1	0.26	0.272727	0.363636	0.3	0.2	0.1	39.6528	74.3889	34.7361
12	144	55	angular	0	3	10	0.89	27	18	L	F	1	Psyc	1	13	-5.6125	3	4	3	2	1	0.26	0.272727	0.363636	0.3	0.2	0.1	39.6528	74.3889	34.7361
13	1	22	angular	0	6	20	2.351	40	19	R	F	1	Psyc	1	25	6.3875	4	7	6	1	6	0.5	0.363636	0.636364	0.6	0.1	0.6	51.7778	52.7361	0.958333
13	2	127	angular	0	3	10	1.085	40	19	R	F	1	Psyc	1	25	6.3875	4	7	6	1	6	0.5	0.363636	0.636364	0.6	0.1	0.6	51.7778	52.7361	0.958333
13	3	56	angular	0	4	10	2.704	48	19	R	F	1	Psyc	1	25	6.3875	4	7	6	1	6	0.5	0.363636	0.636364	0.6	0.1	0.6	51.7778	52.7361	0.958333
13	4	101	curved	1	4	10	0.521	41	19	R	F	1	Psyc	1	25	6.3875	4	7	6	1	6	0.5	0.363636	0.636364	0.6	0.1	0.6	51.7778	52.7361	0.958333
13	5	61	angular	0	9	30	0.674	41	19	R	F	1	Psyc	1	25	6.3875	4	7	6	1	6	0.5	0.363636	0.636364	0.6	0.1	0.6	51.7778	52.7361	0.958333
13	6	117	angular	0	15	30	1.107	41	19	R	F	1	Psyc	1	25	6.3875	4	7	6	1	6	0.5	0.363636	0.636364	0.6	0.1	0.6	51.7778	52.7361	0.958333
13	7	68	curved	1	8	20	0.775	41	19	R	F	1	Psyc	1	25	6.3875	4	7	6	1	6	0.5	0.363636	0.636364	0.6	0.1	0.6	51.7778	52.7361	0.958333
13	8	128	angular	0	4	10	2.022	49	19	R	F	1	Psyc	1	25	6.3875	4	7	6	1	6	0.5	0.363636	0.636364	0.6	0.1	0.6	51.7778	52.7361	0.958333
13	9	60	angular	0	10	20	0.638	36	19	R	F	1	Psyc	1	25	6.3875	4	7	6	1	6	0.5	0.363636	0.636364	0.6	0.1	0.6	51.7778	52.7361	0.958333
13	10	77	angular	0	8	20	2.035	25	19	R	F	1	Psyc	1	25	6.3875	4	7	6	1	6	0.5	0.363636	0.636364	0.6	0.1	0.6	51.7778	52.7361	0.958333
13	11	122	curved	1	8	20	3.832	24	19	R	F	1	Psyc	1	25	6.3875	4	7	6	1	6	0.5	0.363636	0.636364	0.6	0.1	0.6	51.7778	52.7361	0.958333
13	12	82	curved	1	3	10	1.768	63	19	R	F	1	Psyc	1	25	6.3875	4	7	6	1	6	0.5	0.363636	0.636364	0.6	0.1	0.6	51.7778	52.7361	0.958333
13	13	44	angular	0	12	30	4.03	31	19	R	F	1	Psyc	1	25	6.3875	4	7	6	1	6	0.5	0.363636	0.636364	0.6	0.1	0.6	51.7778	52.7361	0.958333
13	14	34	curved	1	9	30	0.507	32	19	R	F	1	Psyc	1	25	6.3875	4	7	6	1	6	0.5	0.363636	0.636364	0.6	0.1	0.6	51.7778	52.7361	0.958333
13	15	97	angular	0	9	30	2.852	35	19	R	F	1	Psyc	1	25	6.3875	4	7	6	1	6	0.5	0.363636	0.636364	0.6	0.1	0.6	51.7778	52.7361	0.958333
13	16	73	angular	0	3	10	1.036	52	19	R	F	1	Psyc	1	25	6.3875	4	7	6	1	6	0.5	0.363636	0.636364	0.6	0.1	0.6	51.7778	52.7361	0.958333
13	17	28	curved	1	3	10	0.921	67	19	R	F	1	Psyc	1	25	6.3875	4	7	6	1	6	0.5	0.363636	0.636364	0.6	0.1	0.6	51.7778	52.7361	0.958333
13	18	75	angular	0	5	10	4.878	89	19	R	F	1	Psyc	1	25	6.3875	4	7	6	1	6	0.5	0.363636	0.636364	0.6	0.1	0.6	51.7778	52.7361	0.958333
13	19	40	angular	0	6	20	1.302	31	19	R	F	1	Psyc	1	25	6.3875	4	7	6	1	6	0.5	0.363636	0.636364	0.6	0.1	0.6	51.7778	52.7361	0.958333
13	20	8	angular	0	12	30	2.432	34	19	R	F	1	Psyc	1	25	6.3875	4	7	6	1	6	0.5	0.363636	0.636364	0.6	0.1	0.6	51.7778	52.7361	0.958333
13	21	24	angular	0	10	20	2.799	31	19	R	F	1	Psyc	1	25	6.3875	4	7	6	1	6	0.5	0.363636	0.636364	0.6	0.1	0.6	51.7778	52.7361	0.958333
13	22	78	angular	0	10	20	0.655	31	19	R	F	1	Psyc	1	25	6.3875	4	7	6	1	6	0.5	0.363636	0.636364	0.6	0.1	0.6	51.7778	52.7361	0.958333
13	23	137	curved	1	4	10	1.155	31	19	R	F	1	Psyc	1	25	6.3875	4	7	6	1	6	0.5	0.363636	0.636364	0.6	0.1	0.6	51.7778	52.7361	0.958333
13	24	125	curved	1	12	30	2.9	31	19	R	F	1	Psyc	1	25	6.3875	4	7	6	1	6	0.5	0.363636	0.636364	0.6	0.1	0.6	51.7778	52.7361	0.958333
13	25	4	angular	0	6	20	0.824	30	19	R	F	1	Psyc	1	25	6.3875	4	7	6	1	6	0.5	0.363636	0.636364	0.6	0.1	0.6	51.7778	52.7361	0.958333
13	26	29	curved	1	4	10	1.272	63	19	R	F	1	Psyc	1	25	6.3875	4	7	6	1	6	0.5	0.363636	0.636364	0.6	0.1	0.6	51.7778	52.7361	0.958333
13	27	16	curved	1	9	30	1.785	48	19	R	F	1	Psyc	1	25	6.3875	4	7	6	1	6	0.5	0.363636	0.636364	0.6	0.1	0.6	51.7778	52.7361	0.958333
13	28	81	angular	0	15	30	3.729	42	19	R	F	1	Psyc	1	25	6.3875	4	7	6	1	6	0.5	0.363636	0.636364	0.6	0.1	0.6	51.7778	52.7361	0.958333
13	29	138	curved	1	5	10	1.717	65	19	R	F	1	Psyc	1	25	6.3875	4	7	6	1	6	0.5	0.363636	0.636364	0.6	0.1	0.6	51.7778	52.7361	0.958333
13	30	71	curved	1	12	30	0.986	37	19	R	F	1	Psyc	1	25	6.3875	4	7	6	1	6	0.5	0.363636	0.636364	0.6	0.1	0.6	51.7778	52.7361	0.958333
13	31	62	angular	0	12	30	0.924	61	19	R	F	1	Psyc	1	25	6.3875	4	7	6	1	6	0.5	0.363636	0.636364	0.6	0.1	0.6	51.7778	52.7361	0.958333
13	32	84	curved	1	5	10	1.855	70	19	R	F	1	Psyc	1	25	6.3875	4	7	6	1	6	0.5	0.363636	0.636364	0.6	0.1	0.6	51.7778	52.7361	0.958333
13	33	52	curved	1	9	30	0.441	70	19	R	F	1	Psyc	1	25	6.3875	4	7	6	1	6	0.5	0.363636	0.636364	0.6	0.1	0.6	51.7778	52.7361	0.958333
13	34	76	angular	0	6	20	0.655	47	19	R	F	1	Psyc	1	25	6.3875	4	7	6	1	6	0.5	0.363636	0.636364	0.6	0.1	0.6	51.7778	52.7361	0.958333
13	35	27	angular	0	15	30	0.536	37	19	R	F	1	Psyc	1	25	6.3875	4	7	6	1	6	0.5	0.363636	0.636364	0.6	0.1	0.6	51.7778	52.7361	0.958333
13	36	142	curved	1	9	30	1.902	38	19	R	F	1	Psyc	1	25	6.3875	4	7	6	1	6	0.5	0.363636	0.636364	0.6	0.1	0.6	51.7778	52.7361	0.958333
13	37	86	curved	1	8	20	0.788	51	19	R	F	1	Psyc	1	25	6.3875	4	7	6	1	6	0.5	0.363636	0.636364	0.6	0.1	0.6	51.7778	52.7361	0.958333
13	38	23	angular	0	8	20	2.27	51	19	R	F	1	Psyc	1	25	6.3875	4	7	6	1	6	0.5	0.363636	0.636364	0.6	0.1	0.6	51.7778	52.7361	0.958333
13	39	139	curved	1	6	20	0.457	51	19	R	F	1	Psyc	1	25	6.3875	4	7	6	1	6	0.5	0.363636	0.636364	0.6	0.1	0.6	51.7778	52.7361	0.958333
13	40	35	curved	1	12	30	0.856	51	19	R	F	1	Psyc	1	25	6.3875	4	7	6	1	6	0.5	0.363636	0.636364	0.6	0.1	0.6	51.7778	52.7361	0.958333
13	41	12	curved	1	5	10	1.732	66	19	R	F	1	Psyc	1	25	6.3875	4	7	6	1	6	0.5	0.363636	0.636364	0.6	0.1	0.6	51.7778	52.7361	0.958333
13	42	113	angular	0	8	20	2.069	53	19	R	F	1	Psyc	1	25	6.3875	4	7	6	1	6	0.5	0.363636	0.636364	0.6	0.1	0.6	51.7778	52.7361	0.958333
13	43	120	curved	1	5	10	0.688	80	19	R	F	1	Psyc	1	25	6.3875	4	7	6	1	6	0.5	0.363636	0.636364	0.6	0.1	0.6	51.7778	52.7361	0.958333
13	44	72	curved	1	15	30	1.019	47	19	R	F	1	Psyc	1	25	6.3875	4	7	6	1	6	0.5	0.363636	0.636364	0.6	0.1	0.6	51.7778	52.7361	0.958333
13	45	99	angular	0	15	30	1.223	45	19	R	F	1	Psyc	1	25	6.3875	4	7	6	1	6	0.5	0.363636	0.636364	0.6	0.1	0.6	51.7778	52.7361	0.958333
13	46	107	curved	1	12	30	5.73	45	19	R	F	1	Psyc	1	25	6.3875	4	7	6	1	6	0.5	0.363636	0.636364	0.6	0.1	0.6	51.7778	52.7361	0.958333
13	47	131	angular	0	8	20	1.357	45	19	R	F	1	Psyc	1	25	6.3875	4	7	6	1	6	0.5	0.363636	0.636364	0.6	0.1	0.6	51.7778	52.7361	0.958333
13	48	45	angular	0	15	30	0.691	42	19	R	F	1	Psyc	1	25	6.3875	4	7	6	1	6	0.5	0.363636	0.636364	0.6	0.1	0.6	51.7778	52.7361	0.958333
13	49	106	curved	1	9	30	4.134	43	19	R	F	1	Psyc	1	25	6.3875	4	7	6	1	6	0.5	0.363636	0.636364	0.6	0.1	0.6	51.7778	52.7361	0.958333
13	50	30	curved	1	5	10	0.604	61	19	R	F	1	Psyc	1	25	6.3875	4	7	6	1	6	0.5	0.363636	0.636364	0.6	0.1	0.6	51.7778	52.7361	0.958333
13	51	18	curved	1	15	30	3.53	50	19	R	F	1	Psyc	1	25	6.3875	4	7	6	1	6	0.5	0.363636	0.636364	0.6	0.1	0.6	51.7778	52.7361	0.958333
13	52	100	curved	1	3	10	3.784	61	19	R	F	1	Psyc	1	25	6.3875	4	7	6	1	6	0.5	0.363636	0.636364	0.6	0.1	0.6	51.7778	52.7361	0.958333
13	53	36	curved	1	15	30	2.566	57	19	R	F	1	Psyc	1	25	6.3875	4	7	6	1	6	0.5	0.363636	0.636364	0.6	0.1	0.6	51.7778	52.7361	0.958333
13	54	85	curved	1	6	20	5.909	60	19	R	F	1	Psyc	1	25	6.3875	4	7	6	1	6	0.5	0.363636	0.636364	0.6	0.1	0.6	51.7778	52.7361	0.958333
13	55	132	angular	0	10	20	0.739	56	19	R	F	1	Psyc	1	25	6.3875	4	7	6	1	6	0.5	0.363636	0.636364	0.6	0.1	0.6	51.7778	52.7361	0.958333
13	56	39	angular	0	5	10	0.592	56	19	R	F	1	Psyc	1	25	6.3875	4	7	6	1	6	0.5	0.363636	0.636364	0.6	0.1	0.6	51.7778	52.7361	0.958333
13	57	119	curved	1	4	10	0.887	73	19	R	F	1	Psyc	1	25	6.3875	4	7	6	1	6	0.5	0.363636	0.636364	0.6	0.1	0.6	51.7778	52.7361	0.958333
13	58	59	angular	0	8	20	1.269	66	19	R	F	1	Psyc	1	25	6.3875	4	7	6	1	6	0.5	0.363636	0.636364	0.6	0.1	0.6	51.7778	52.7361	0.958333
13	59	90	curved	1	15	30	0.521	57	19	R	F	1	Psyc	1	25	6.3875	4	7	6	1	6	0.5	0.363636	0.636364	0.6	0.1	0.6	51.7778	52.7361	0.958333
13	60	53	curved	1	12	30	2.105	57	19	R	F	1	Psyc	1	25	6.3875	4	7	6	1	6	0.5	0.363636	0.636364	0.6	0.1	0.6	51.7778	52.7361	0.958333
13	61	98	angular	0	12	30	5.976	60	19	R	F	1	Psyc	1	25	6.3875	4	7	6	1	6	0.5	0.363636	0.636364	0.6	0.1	0.6	51.7778	52.7361	0.958333
13	62	46	curved	1	3	10	1.137	53	19	R	F	1	Psyc	1	25	6.3875	4	7	6	1	6	0.5	0.363636	0.636364	0.6	0.1	0.6	51.7778	52.7361	0.958333
13	63	108	curved	1	15	30	0.757	51	19	R	F	1	Psyc	1	25	6.3875	4	7	6	1	6	0.5	0.363636	0.636364	0.6	0.1	0.6	51.7778	52.7361	0.958333
13	64	91	angular	0	3	10	1.487	51	19	R	F	1	Psyc	1	25	6.3875	4	7	6	1	6	0.5	0.363636	0.636364	0.6	0.1	0.6	51.7778	52.7361	0.958333
13	65	19	angular	0	3	10	1.869	49	19	R	F	1	Psyc	1	25	6.3875	4	7	6	1	6	0.5	0.363636	0.636364	0.6	0.1	0.6	51.7778	52.7361	0.958333
13	66	69	curved	1	10	20	1.49	48	19	R	F	1	Psyc	1	25	6.3875	4	7	6	1	6	0.5	0.363636	0.636364	0.6	0.1	0.6	51.7778	52.7361	0.958333
13	67	144	curved	1	15	30	1.124	49	19	R	F	1	Psyc	1	25	6.3875	4	7	6	1	6	0.5	0.363636	0.636364	0.6	0.1	0.6	51.7778	52.7361	0.958333
13	68	70	curved	1	9	30	0.624	49	19	R	F	1	Psyc	1	25	6.3875	4	7	6	1	6	0.5	0.363636	0.636364	0.6	0.1	0.6	51.7778	52.7361	0.958333
13	69	57	angular	0	5	10	2.052	44	19	R	F	1	Psyc	1	25	6.3875	4	7	6	1	6	0.5	0.363636	0.636364	0.6	0.1	0.6	51.7778	52.7361	0.958333
13	70	41	angular	0	8	20	0.673	44	19	R	F	1	Psyc	1	25	6.3875	4	7	6	1	6	0.5	0.363636	0.636364	0.6	0.1	0.6	51.7778	52.7361	0.958333
13	71	135	angular	0	15	30	4.815	44	19	R	F	1	Psyc	1	25	6.3875	4	7	6	1	6	0.5	0.363636	0.636364	0.6	0.1	0.6	51.7778	52.7361	0.958333
13	72	114	angular	0	10	20	2.135	43	19	R	F	1	Psyc	1	25	6.3875	4	7	6	1	6	0.5	0.363636	0.636364	0.6	0.1	0.6	51.7778	52.7361	0.958333
13	73	124	curved	1	9	30	3.334	41	19	R	F	1	Psyc	1	25	6.3875	4	7	6	1	6	0.5	0.363636	0.636364	0.6	0.1	0.6	51.7778	52.7361	0.958333
13	74	109	angular	0	3	10	4.997	43	19	R	F	1	Psyc	1	25	6.3875	4	7	6	1	6	0.5	0.363636	0.636364	0.6	0.1	0.6	51.7778	52.7361	0.958333
13	75	88	curved	1	9	30	2.187	56	19	R	F	1	Psyc	1	25	6.3875	4	7	6	1	6	0.5	0.363636	0.636364	0.6	0.1	0.6	51.7778	52.7361	0.958333
13	76	2	angular	0	4	10	1.104	52	19	R	F	1	Psyc	1	25	6.3875	4	7	6	1	6	0.5	0.363636	0.636364	0.6	0.1	0.6	51.7778	52.7361	0.958333
13	77	143	curved	1	12	30	7.754	42	19	R	F	1	Psyc	1	25	6.3875	4	7	6	1	6	0.5	0.363636	0.636364	0.6	0.1	0.6	51.7778	52.7361	0.958333
13	78	136	curved	1	3	10	3.053	53	19	R	F	1	Psyc	1	25	6.3875	4	7	6	1	6	0.5	0.363636	0.636364	0.6	0.1	0.6	51.7778	52.7361	0.958333
13	79	104	curved	1	8	20	2.05	56	19	R	F	1	Psyc	1	25	6.3875	4	7	6	1	6	0.5	0.363636	0.636364	0.6	0.1	0.6	51.7778	52.7361	0.958333
13	80	64	curved	1	3	10	0.957	63	19	R	F	1	Psyc	1	25	6.3875	4	7	6	1	6	0.5	0.363636	0.636364	0.6	0.1	0.6	51.7778	52.7361	0.958333
13	81	83	curved	1	4	10	4.282	68	19	R	F	1	Psyc	1	25	6.3875	4	7	6	1	6	0.5	0.363636	0.636364	0.6	0.1	0.6	51.7778	52.7361	0.958333
13	82	112	angular	0	6	20	1.107	77	19	R	F	1	Psyc	1	25	6.3875	4	7	6	1	6	0.5	0.363636	0.636364	0.6	0.1	0.6	51.7778	52.7361	0.958333
13	83	102	curved	1	5	10	0.675	77	19	R	F	1	Psyc	1	25	6.3875	4	7	6	1	6	0.5	0.363636	0.636364	0.6	0.1	0.6	51.7778	52.7361	0.958333
13	84	58	angular	0	6	20	1.09	77	19	R	F	1	Psyc	1	25	6.3875	4	7	6	1	6	0.5	0.363636	0.636364	0.6	0.1	0.6	51.7778	52.7361	0.958333
13	85	80	angular	0	12	30	2.982	51	19	R	F	1	Psyc	1	25	6.3875	4	7	6	1	6	0.5	0.363636	0.636364	0.6	0.1	0.6	51.7778	52.7361	0.958333
13	86	123	curved	1	10	20	2.118	45	19	R	F	1	Psyc	1	25	6.3875	4	7	6	1	6	0.5	0.363636	0.636364	0.6	0.1	0.6	51.7778	52.7361	0.958333
13	87	25	angular	0	9	30	0.924	40	19	R	F	1	Psyc	1	25	6.3875	4	7	6	1	6	0.5	0.363636	0.636364	0.6	0.1	0.6	51.7778	52.7361	0.958333
13	88	141	curved	1	10	20	0.576	40	19	R	F	1	Psyc	1	25	6.3875	4	7	6	1	6	0.5	0.363636	0.636364	0.6	0.1	0.6	51.7778	52.7361	0.958333
13	89	79	angular	0	9	30	2.036	40	19	R	F	1	Psyc	1	25	6.3875	4	7	6	1	6	0.5	0.363636	0.636364	0.6	0.1	0.6	51.7778	52.7361	0.958333
13	90	134	angular	0	12	30	2.785	41	19	R	F	1	Psyc	1	25	6.3875	4	7	6	1	6	0.5	0.363636	0.636364	0.6	0.1	0.6	51.7778	52.7361	0.958333
13	91	48	curved	1	5	10	1.337	74	19	R	F	1	Psyc	1	25	6.3875	4	7	6	1	6	0.5	0.363636	0.636364	0.6	0.1	0.6	51.7778	52.7361	0.958333
13	92	54	curved	1	15	30	1.339	51	19	R	F	1	Psyc	1	25	6.3875	4	7	6	1	6	0.5	0.363636	0.636364	0.6	0.1	0.6	51.7778	52.7361	0.958333
13	93	15	curved	1	10	20	1.387	64	19	R	F	1	Psyc	1	25	6.3875	4	7	6	1	6	0.5	0.363636	0.636364	0.6	0.1	0.6	51.7778	52.7361	0.958333
13	94	47	curved	1	4	10	2.534	42	19	R	F	1	Psyc	1	25	6.3875	4	7	6	1	6	0.5	0.363636	0.636364	0.6	0.1	0.6	51.7778	52.7361	0.958333
13	95	89	curved	1	12	30	0.791	36	19	R	F	1	Psyc	1	25	6.3875	4	7	6	1	6	0.5	0.363636	0.636364	0.6	0.1	0.6	51.7778	52.7361	0.958333
13	96	129	angular	0	5	10	2.699	87	19	R	F	1	Psyc	1	25	6.3875	4	7	6	1	6	0.5	0.363636	0.636364	0.6	0.1	0.6	51.7778	52.7361	0.958333
13	97	26	angular	0	12	30	2.534	70	19	R	F	1	Psyc	1	25	6.3875	4	7	6	1	6	0.5	0.363636	0.636364	0.6	0.1	0.6	51.7778	52.7361	0.958333
13	98	49	curved	1	6	20	3.58	33	19	R	F	1	Psyc	1	25	6.3875	4	7	6	1	6	0.5	0.363636	0.636364	0.6	0.1	0.6	51.7778	52.7361	0.958333
13	99	42	angular	0	10	20	2.904	36	19	R	F	1	Psyc	1	25	6.3875	4	7	6	1	6	0.5	0.363636	0.636364	0.6	0.1	0.6	51.7778	52.7361	0.958333
13	100	17	curved	1	12	30	4.649	59	19	R	F	1	Psyc	1	25	6.3875	4	7	6	1	6	0.5	0.363636	0.636364	0.6	0.1	0.6	51.7778	52.7361	0.958333
13	101	103	curved	1	6	20	1.103	49	19	R	F	1	Psyc	1	25	6.3875	4	7	6	1	6	0.5	0.363636	0.636364	0.6	0.1	0.6	51.7778	52.7361	0.958333
13	102	3	angular	0	5	10	2.017	70	19	R	F	1	Psyc	1	25	6.3875	4	7	6	1	6	0.5	0.363636	0.636364	0.6	0.1	0.6	51.7778	52.7361	0.958333
13	103	7	angular	0	9	30	0.672	66	19	R	F	1	Psyc	1	25	6.3875	4	7	6	1	6	0.5	0.363636	0.636364	0.6	0.1	0.6	51.7778	52.7361	0.958333
13	104	92	angular	0	4	10	2.218	62	19	R	F	1	Psyc	1	25	6.3875	4	7	6	1	6	0.5	0.363636	0.636364	0.6	0.1	0.6	51.7778	52.7361	0.958333
13	105	116	angular	0	12	30	2.949	58	19	R	F	1	Psyc	1	25	6.3875	4	7	6	1	6	0.5	0.363636	0.636364	0.6	0.1	0.6	51.7778	52.7361	0.958333
13	106	111	angular	0	5	10	5.74	71	19	R	F	1	Psyc	1	25	6.3875	4	7	6	1	6	0.5	0.363636	0.636364	0.6	0.1	0.6	51.7778	52.7361	0.958333
13	107	63	angular	0	15	30	1.386	74	19	R	F	1	Psyc	1	25	6.3875	4	7	6	1	6	0.5	0.363636	0.636364	0.6	0.1	0.6	51.7778	52.7361	0.958333
13	108	1	angular	0	3	10	1.167	69	19	R	F	1	Psyc	1	25	6.3875	4	7	6	1	6	0.5	0.363636	0.636364	0.6	0.1	0.6	51.7778	52.7361	0.958333
13	109	130	angular	0	6	20	2.782	56	19	R	F	1	Psyc	1	25	6.3875	4	7	6	1	6	0.5	0.363636	0.636364	0.6	0.1	0.6	51.7778	52.7361	0.958333
13	110	9	angular	0	15	30	4.495	74	19	R	F	1	Psyc	1	25	6.3875	4	7	6	1	6	0.5	0.363636	0.636364	0.6	0.1	0.6	51.7778	52.7361	0.958333
13	111	74	angular	0	4	10	1.501	57	19	R	F	1	Psyc	1	25	6.3875	4	7	6	1	6	0.5	0.363636	0.636364	0.6	0.1	0.6	51.7778	52.7361	0.958333
13	112	43	angular	0	9	30	0.62	57	19	R	F	1	Psyc	1	25	6.3875	4	7	6	1	6	0.5	0.363636	0.636364	0.6	0.1	0.6	51.7778	52.7361	0.958333
13	113	13	curved	1	6	20	0.44	57	19	R	F	1	Psyc	1	25	6.3875	4	7	6	1	6	0.5	0.363636	0.636364	0.6	0.1	0.6	51.7778	52.7361	0.958333
13	114	115	angular	0	9	30	0.688	57	19	R	F	1	Psyc	1	25	6.3875	4	7	6	1	6	0.5	0.363636	0.636364	0.6	0.1	0.6	51.7778	52.7361	0.958333
13	115	105	curved	1	10	20	0.407	57	19	R	F	1	Psyc	1	25	6.3875	4	7	6	1	6	0.5	0.363636	0.636364	0.6	0.1	0.6	51.7778	52.7361	0.958333
13	116	94	angular	0	6	20	0.593	57	19	R	F	1	Psyc	1	25	6.3875	4	7	6	1	6	0.5	0.363636	0.636364	0.6	0.1	0.6	51.7778	52.7361	0.958333
13	117	20	angular	0	4	10	0.92	57	19	R	F	1	Psyc	1	25	6.3875	4	7	6	1	6	0.5	0.363636	0.636364	0.6	0.1	0.6	51.7778	52.7361	0.958333
13	118	110	angular	0	4	10	0.656	57	19	R	F	1	Psyc	1	25	6.3875	4	7	6	1	6	0.5	0.363636	0.636364	0.6	0.1	0.6	51.7778	52.7361	0.958333
13	119	6	angular	0	10	20	0.708	57	19	R	F	1	Psyc	1	25	6.3875	4	7	6	1	6	0.5	0.363636	0.636364	0.6	0.1	0.6	51.7778	52.7361	0.958333
13	120	5	angular	0	8	20	1.224	49	19	R	F	1	Psyc	1	25	6.3875	4	7	6	1	6	0.5	0.363636	0.636364	0.6	0.1	0.6	51.7778	52.7361	0.958333
13	121	37	angular	0	3	10	1.889	59	19	R	F	1	Psyc	1	25	6.3875	4	7	6	1	6	0.5	0.363636	0.636364	0.6	0.1	0.6	51.7778	52.7361	0.958333
13	122	126	curved	1	15	30	1.156	52	19	R	F	1	Psyc	1	25	6.3875	4	7	6	1	6	0.5	0.363636	0.636364	0.6	0.1	0.6	51.7778	52.7361	0.958333
13	123	11	curved	1	4	10	0.969	63	19	R	F	1	Psyc	1	25	6.3875	4	7	6	1	6	0.5	0.363636	0.636364	0.6	0.1	0.6	51.7778	52.7361	0.958333
13	124	118	curved	1	3	10	2.404	62	19	R	F	1	Psyc	1	25	6.3875	4	7	6	1	6	0.5	0.363636	0.636364	0.6	0.1	0.6	51.7778	52.7361	0.958333
13	125	96	angular	0	10	20	0.924	58	19	R	F	1	Psyc	1	25	6.3875	4	7	6	1	6	0.5	0.363636	0.636364	0.6	0.1	0.6	51.7778	52.7361	0.958333
13	126	38	angular	0	4	10	0.673	55	19	R	F	1	Psyc	1	25	6.3875	4	7	6	1	6	0.5	0.363636	0.636364	0.6	0.1	0.6	51.7778	52.7361	0.958333
13	127	50	curved	1	8	20	0.507	55	19	R	F	1	Psyc	1	25	6.3875	4	7	6	1	6	0.5	0.363636	0.636364	0.6	0.1	0.6	51.7778	52.7361	0.958333
13	128	87	curved	1	10	20	1.686	55	19	R	F	1	Psyc	1	25	6.3875	4	7	6	1	6	0.5	0.363636	0.636364	0.6	0.1	0.6	51.7778	52.7361	0.958333
13	129	133	angular	0	9	30	0.473	55	19	R	F	1	Psyc	1	25	6.3875	4	7	6	1	6	0.5	0.363636	0.636364	0.6	0.1	0.6	51.7778	52.7361	0.958333
13	130	21	angular	0	5	10	1.738	55	19	R	F	1	Psyc	1	25	6.3875	4	7	6	1	6	0.5	0.363636	0.636364	0.6	0.1	0.6	51.7778	52.7361	0.958333
13	131	93	angular	0	5	10	0.954	71	19	R	F	1	Psyc	1	25	6.3875	4	7	6	1	6	0.5	0.363636	0.636364	0.6	0.1	0.6	51.7778	52.7361	0.958333
13	132	140	curved	1	8	20	2.17	55	19	R	F	1	Psyc	1	25	6.3875	4	7	6	1	6	0.5	0.363636	0.636364	0.6	0.1	0.6	51.7778	52.7361	0.958333
13	133	66	curved	1	5	10	2.085	55	19	R	F	1	Psyc	1	25	6.3875	4	7	6	1	6	0.5	0.363636	0.636364	0.6	0.1	0.6	51.7778	52.7361	0.958333
13	134	121	curved	1	6	20	0.507	52	19	R	F	1	Psyc	1	25	6.3875	4	7	6	1	6	0.5	0.363636	0.636364	0.6	0.1	0.6	51.7778	52.7361	0.958333
13	135	67	curved	1	6	20	1.605	48	19	R	F	1	Psyc	1	25	6.3875	4	7	6	1	6	0.5	0.363636	0.636364	0.6	0.1	0.6	51.7778	52.7361	0.958333
13	136	10	curved	1	3	10	0.871	69	19	R	F	1	Psyc	1	25	6.3875	4	7	6	1	6	0.5	0.363636	0.636364	0.6	0.1	0.6	51.7778	52.7361	0.958333
13	137	14	curved	1	8	20	5.76	53	19	R	F	1	Psyc	1	25	6.3875	4	7	6	1	6	0.5	0.363636	0.636364	0.6	0.1	0.6	51.7778	52.7361	0.958333
13	138	65	curved	1	4	10	0.905	51	19	R	F	1	Psyc	1	25	6.3875	4	7	6	1	6	0.5	0.363636	0.636364	0.6	0.1	0.6	51.7778	52.7361	0.958333
13	139	33	curved	1	10	20	0.687	47	19	R	F	1	Psyc	1	25	6.3875	4	7	6	1	6	0.5	0.363636	0.636364	0.6	0.1	0.6	51.7778	52.7361	0.958333
13	140	51	curved	1	10	20	0.741	46	19	R	F	1	Psyc	1	25	6.3875	4	7	6	1	6	0.5	0.363636	0.636364	0.6	0.1	0.6	51.7778	52.7361	0.958333
13	141	32	curved	1	8	20	0.555	45	19	R	F	1	Psyc	1	25	6.3875	4	7	6	1	6	0.5	0.363636	0.636364	0.6	0.1	0.6	51.7778	52.7361	0.958333
13	142	31	curved	1	6	20	0.588	45	19	R	F	1	Psyc	1	25	6.3875	4	7	6	1	6	0.5	0.363636	0.636364	0.6	0.1	0.6	51.7778	52.7361	0.958333
13	143	95	angular	0	8	20	0.422	45	19	R	F	1	Psyc	1	25	6.3875	4	7	6	1	6	0.5	0.363636	0.636364	0.6	0.1	0.6	51.7778	52.7361	0.958333
13	144	55	angular	0	3	10	2.851	48	19	R	F	1	Psyc	1	25	6.3875	4	7	6	1	6	0.5	0.363636	0.636364	0.6	0.1	0.6	51.7778	52.7361	0.958333
14	1	43	angular	0	9	30	1.133	15	18	R	F	1	Psyc	1	10	-8.6125	0	4	2	3	1	0.2	0	0.363636	0.2	0.3	0.1	24.0139	61.8472	37.8333
14	2	57	angular	0	5	10	2.429	53	18	R	F	1	Psyc	1	10	-8.6125	0	4	2	3	1	0.2	0	0.363636	0.2	0.3	0.1	24.0139	61.8472	37.8333
14	3	97	angular	0	9	30	1.015	19	18	R	F	1	Psyc	1	10	-8.6125	0	4	2	3	1	0.2	0	0.363636	0.2	0.3	0.1	24.0139	61.8472	37.8333
14	4	74	angular	0	4	10	1.87	58	18	R	F	1	Psyc	1	10	-8.6125	0	4	2	3	1	0.2	0	0.363636	0.2	0.3	0.1	24.0139	61.8472	37.8333
14	5	111	angular	0	5	10	1.203	58	18	R	F	1	Psyc	1	10	-8.6125	0	4	2	3	1	0.2	0	0.363636	0.2	0.3	0.1	24.0139	61.8472	37.8333
14	6	96	angular	0	10	20	1.27	31	18	R	F	1	Psyc	1	10	-8.6125	0	4	2	3	1	0.2	0	0.363636	0.2	0.3	0.1	24.0139	61.8472	37.8333
14	7	78	angular	0	10	20	1.622	17	18	R	F	1	Psyc	1	10	-8.6125	0	4	2	3	1	0.2	0	0.363636	0.2	0.3	0.1	24.0139	61.8472	37.8333
14	8	3	angular	0	5	10	0.768	17	18	R	F	1	Psyc	1	10	-8.6125	0	4	2	3	1	0.2	0	0.363636	0.2	0.3	0.1	24.0139	61.8472	37.8333
14	9	31	curved	1	6	20	2.339	73	18	R	F	1	Psyc	1	10	-8.6125	0	4	2	3	1	0.2	0	0.363636	0.2	0.3	0.1	24.0139	61.8472	37.8333
14	10	133	angular	0	9	30	1.438	26	18	R	F	1	Psyc	1	10	-8.6125	0	4	2	3	1	0.2	0	0.363636	0.2	0.3	0.1	24.0139	61.8472	37.8333
14	11	118	curved	1	3	10	1.387	58	18	R	F	1	Psyc	1	10	-8.6125	0	4	2	3	1	0.2	0	0.363636	0.2	0.3	0.1	24.0139	61.8472	37.8333
14	12	95	angular	0	8	20	1.302	13	18	R	F	1	Psyc	1	10	-8.6125	0	4	2	3	1	0.2	0	0.363636	0.2	0.3	0.1	24.0139	61.8472	37.8333
14	13	142	curved	1	9	30	1.567	48	18	R	F	1	Psyc	1	10	-8.6125	0	4	2	3	1	0.2	0	0.363636	0.2	0.3	0.1	24.0139	61.8472	37.8333
14	14	44	angular	0	12	30	1.187	28	18	R	F	1	Psyc	1	10	-8.6125	0	4	2	3	1	0.2	0	0.363636	0.2	0.3	0.1	24.0139	61.8472	37.8333
14	15	18	curved	1	15	30	2.207	36	18	R	F	1	Psyc	1	10	-8.6125	0	4	2	3	1	0.2	0	0.363636	0.2	0.3	0.1	24.0139	61.8472	37.8333
14	16	70	curved	1	9	30	1.438	44	18	R	F	1	Psyc	1	10	-8.6125	0	4	2	3	1	0.2	0	0.363636	0.2	0.3	0.1	24.0139	61.8472	37.8333
14	17	115	angular	0	9	30	1.102	21	18	R	F	1	Psyc	1	10	-8.6125	0	4	2	3	1	0.2	0	0.363636	0.2	0.3	0.1	24.0139	61.8472	37.8333
14	18	79	angular	0	9	30	1.636	10	18	R	F	1	Psyc	1	10	-8.6125	0	4	2	3	1	0.2	0	0.363636	0.2	0.3	0.1	24.0139	61.8472	37.8333
14	19	48	curved	1	5	10	2.555	79	18	R	F	1	Psyc	1	10	-8.6125	0	4	2	3	1	0.2	0	0.363636	0.2	0.3	0.1	24.0139	61.8472	37.8333
14	20	6	angular	0	10	20	1.636	8	18	R	F	1	Psyc	1	10	-8.6125	0	4	2	3	1	0.2	0	0.363636	0.2	0.3	0.1	24.0139	61.8472	37.8333
14	21	38	angular	0	4	10	1.922	32	18	R	F	1	Psyc	1	10	-8.6125	0	4	2	3	1	0.2	0	0.363636	0.2	0.3	0.1	24.0139	61.8472	37.8333
14	22	92	angular	0	4	10	0.718	38	18	R	F	1	Psyc	1	10	-8.6125	0	4	2	3	1	0.2	0	0.363636	0.2	0.3	0.1	24.0139	61.8472	37.8333
14	23	80	angular	0	12	30	2.021	7	18	R	F	1	Psyc	1	10	-8.6125	0	4	2	3	1	0.2	0	0.363636	0.2	0.3	0.1	24.0139	61.8472	37.8333
14	24	49	curved	1	6	20	1.216	69	18	R	F	1	Psyc	1	10	-8.6125	0	4	2	3	1	0.2	0	0.363636	0.2	0.3	0.1	24.0139	61.8472	37.8333
14	25	41	angular	0	8	20	0.781	32	18	R	F	1	Psyc	1	10	-8.6125	0	4	2	3	1	0.2	0	0.363636	0.2	0.3	0.1	24.0139	61.8472	37.8333
14	26	63	angular	0	15	30	0.748	18	18	R	F	1	Psyc	1	10	-8.6125	0	4	2	3	1	0.2	0	0.363636	0.2	0.3	0.1	24.0139	61.8472	37.8333
14	27	22	angular	0	6	20	1.068	37	18	R	F	1	Psyc	1	10	-8.6125	0	4	2	3	1	0.2	0	0.363636	0.2	0.3	0.1	24.0139	61.8472	37.8333
14	28	55	angular	0	3	10	1.25	48	18	R	F	1	Psyc	1	10	-8.6125	0	4	2	3	1	0.2	0	0.363636	0.2	0.3	0.1	24.0139	61.8472	37.8333
14	29	68	curved	1	8	20	0.684	69	18	R	F	1	Psyc	1	10	-8.6125	0	4	2	3	1	0.2	0	0.363636	0.2	0.3	0.1	24.0139	61.8472	37.8333
14	30	105	curved	1	10	20	0.467	74	18	R	F	1	Psyc	1	10	-8.6125	0	4	2	3	1	0.2	0	0.363636	0.2	0.3	0.1	24.0139	61.8472	37.8333
14	31	46	curved	1	3	10	0.449	65	18	R	F	1	Psyc	1	10	-8.6125	0	4	2	3	1	0.2	0	0.363636	0.2	0.3	0.1	24.0139	61.8472	37.8333
14	32	39	angular	0	5	10	0.899	36	18	R	F	1	Psyc	1	10	-8.6125	0	4	2	3	1	0.2	0	0.363636	0.2	0.3	0.1	24.0139	61.8472	37.8333
14	33	107	curved	1	12	30	0.414	47	18	R	F	1	Psyc	1	10	-8.6125	0	4	2	3	1	0.2	0	0.363636	0.2	0.3	0.1	24.0139	61.8472	37.8333
14	34	87	curved	1	10	20	0.413	47	18	R	F	1	Psyc	1	10	-8.6125	0	4	2	3	1	0.2	0	0.363636	0.2	0.3	0.1	24.0139	61.8472	37.8333
14	35	138	curved	1	5	10	2.373	84	18	R	F	1	Psyc	1	10	-8.6125	0	4	2	3	1	0.2	0	0.363636	0.2	0.3	0.1	24.0139	61.8472	37.8333
14	36	126	curved	1	15	30	0.533	65	18	R	F	1	Psyc	1	10	-8.6125	0	4	2	3	1	0.2	0	0.363636	0.2	0.3	0.1	24.0139	61.8472	37.8333
14	37	94	angular	0	6	20	1.165	32	18	R	F	1	Psyc	1	10	-8.6125	0	4	2	3	1	0.2	0	0.363636	0.2	0.3	0.1	24.0139	61.8472	37.8333
14	38	128	angular	0	4	10	0.714	32	18	R	F	1	Psyc	1	10	-8.6125	0	4	2	3	1	0.2	0	0.363636	0.2	0.3	0.1	24.0139	61.8472	37.8333
14	39	101	curved	1	4	10	1.05	60	18	R	F	1	Psyc	1	10	-8.6125	0	4	2	3	1	0.2	0	0.363636	0.2	0.3	0.1	24.0139	61.8472	37.8333
14	40	42	angular	0	10	20	0.936	38	18	R	F	1	Psyc	1	10	-8.6125	0	4	2	3	1	0.2	0	0.363636	0.2	0.3	0.1	24.0139	61.8472	37.8333
14	41	77	angular	0	8	20	0.485	38	18	R	F	1	Psyc	1	10	-8.6125	0	4	2	3	1	0.2	0	0.363636	0.2	0.3	0.1	24.0139	61.8472	37.8333
14	42	131	angular	0	8	20	0.617	23	18	R	F	1	Psyc	1	10	-8.6125	0	4	2	3	1	0.2	0	0.363636	0.2	0.3	0.1	24.0139	61.8472	37.8333
14	43	125	curved	1	12	30	1.351	43	18	R	F	1	Psyc	1	10	-8.6125	0	4	2	3	1	0.2	0	0.363636	0.2	0.3	0.1	24.0139	61.8472	37.8333
14	44	100	curved	1	3	10	0.462	68	18	R	F	1	Psyc	1	10	-8.6125	0	4	2	3	1	0.2	0	0.363636	0.2	0.3	0.1	24.0139	61.8472	37.8333
14	45	90	curved	1	15	30	0.45	62	18	R	F	1	Psyc	1	10	-8.6125	0	4	2	3	1	0.2	0	0.363636	0.2	0.3	0.1	24.0139	61.8472	37.8333
14	46	71	curved	1	12	30	0.582	62	18	R	F	1	Psyc	1	10	-8.6125	0	4	2	3	1	0.2	0	0.363636	0.2	0.3	0.1	24.0139	61.8472	37.8333
14	47	34	curved	1	9	30	2.307	54	18	R	F	1	Psyc	1	10	-8.6125	0	4	2	3	1	0.2	0	0.363636	0.2	0.3	0.1	24.0139	61.8472	37.8333
14	48	12	curved	1	5	10	1.371	54	18	R	F	1	Psyc	1	10	-8.6125	0	4	2	3	1	0.2	0	0.363636	0.2	0.3	0.1	24.0139	61.8472	37.8333
14	49	132	angular	0	10	20	1.367	18	18	R	F	1	Psyc	1	10	-8.6125	0	4	2	3	1	0.2	0	0.363636	0.2	0.3	0.1	24.0139	61.8472	37.8333
14	50	9	angular	0	15	30	0.649	7	18	R	F	1	Psyc	1	10	-8.6125	0	4	2	3	1	0.2	0	0.363636	0.2	0.3	0.1	24.0139	61.8472	37.8333
14	51	104	curved	1	8	20	0.766	33	18	R	F	1	Psyc	1	10	-8.6125	0	4	2	3	1	0.2	0	0.363636	0.2	0.3	0.1	24.0139	61.8472	37.8333
14	52	109	angular	0	3	10	0.851	22	18	R	F	1	Psyc	1	10	-8.6125	0	4	2	3	1	0.2	0	0.363636	0.2	0.3	0.1	24.0139	61.8472	37.8333
14	53	61	angular	0	9	30	2.273	13	18	R	F	1	Psyc	1	10	-8.6125	0	4	2	3	1	0.2	0	0.363636	0.2	0.3	0.1	24.0139	61.8472	37.8333
14	54	37	angular	0	3	10	2.524	30	18	R	F	1	Psyc	1	10	-8.6125	0	4	2	3	1	0.2	0	0.363636	0.2	0.3	0.1	24.0139	61.8472	37.8333
14	55	10	curved	1	3	10	1.871	68	18	R	F	1	Psyc	1	10	-8.6125	0	4	2	3	1	0.2	0	0.363636	0.2	0.3	0.1	24.0139	61.8472	37.8333
14	56	11	curved	1	4	10	3.845	61	18	R	F	1	Psyc	1	10	-8.6125	0	4	2	3	1	0.2	0	0.363636	0.2	0.3	0.1	24.0139	61.8472	37.8333
14	57	7	angular	0	9	30	1.354	14	18	R	F	1	Psyc	1	10	-8.6125	0	4	2	3	1	0.2	0	0.363636	0.2	0.3	0.1	24.0139	61.8472	37.8333
14	58	124	curved	1	9	30	1.687	64	18	R	F	1	Psyc	1	10	-8.6125	0	4	2	3	1	0.2	0	0.363636	0.2	0.3	0.1	24.0139	61.8472	37.8333
14	59	33	curved	1	10	20	0.568	55	18	R	F	1	Psyc	1	10	-8.6125	0	4	2	3	1	0.2	0	0.363636	0.2	0.3	0.1	24.0139	61.8472	37.8333
14	60	123	curved	1	10	20	2.454	49	18	R	F	1	Psyc	1	10	-8.6125	0	4	2	3	1	0.2	0	0.363636	0.2	0.3	0.1	24.0139	61.8472	37.8333
14	61	117	angular	0	15	30	2.755	8	18	R	F	1	Psyc	1	10	-8.6125	0	4	2	3	1	0.2	0	0.363636	0.2	0.3	0.1	24.0139	61.8472	37.8333
14	62	25	angular	0	9	30	0.901	29	18	R	F	1	Psyc	1	10	-8.6125	0	4	2	3	1	0.2	0	0.363636	0.2	0.3	0.1	24.0139	61.8472	37.8333
14	63	54	curved	1	15	30	3.259	37	18	R	F	1	Psyc	1	10	-8.6125	0	4	2	3	1	0.2	0	0.363636	0.2	0.3	0.1	24.0139	61.8472	37.8333
14	64	47	curved	1	4	10	1.384	75	18	R	F	1	Psyc	1	10	-8.6125	0	4	2	3	1	0.2	0	0.363636	0.2	0.3	0.1	24.0139	61.8472	37.8333
14	65	15	curved	1	10	20	0.748	60	18	R	F	1	Psyc	1	10	-8.6125	0	4	2	3	1	0.2	0	0.363636	0.2	0.3	0.1	24.0139	61.8472	37.8333
14	66	114	angular	0	10	20	0.902	12	18	R	F	1	Psyc	1	10	-8.6125	0	4	2	3	1	0.2	0	0.363636	0.2	0.3	0.1	24.0139	61.8472	37.8333
14	67	129	angular	0	5	10	0.814	49	18	R	F	1	Psyc	1	10	-8.6125	0	4	2	3	1	0.2	0	0.363636	0.2	0.3	0.1	24.0139	61.8472	37.8333
14	68	60	angular	0	10	20	1.032	28	18	R	F	1	Psyc	1	10	-8.6125	0	4	2	3	1	0.2	0	0.363636	0.2	0.3	0.1	24.0139	61.8472	37.8333
14	69	122	curved	1	8	20	0.949	63	18	R	F	1	Psyc	1	10	-8.6125	0	4	2	3	1	0.2	0	0.363636	0.2	0.3	0.1	24.0139	61.8472	37.8333
14	70	21	angular	0	5	10	1.166	30	18	R	F	1	Psyc	1	10	-8.6125	0	4	2	3	1	0.2	0	0.363636	0.2	0.3	0.1	24.0139	61.8472	37.8333
14	71	72	curved	1	15	30	0.433	46	18	R	F	1	Psyc	1	10	-8.6125	0	4	2	3	1	0.2	0	0.363636	0.2	0.3	0.1	24.0139	61.8472	37.8333
14	72	86	curved	1	8	20	0.666	65	18	R	F	1	Psyc	1	10	-8.6125	0	4	2	3	1	0.2	0	0.363636	0.2	0.3	0.1	24.0139	61.8472	37.8333
14	73	8	angular	0	12	30	0.668	23	18	R	F	1	Psyc	1	10	-8.6125	0	4	2	3	1	0.2	0	0.363636	0.2	0.3	0.1	24.0139	61.8472	37.8333
14	74	19	angular	0	3	10	0.532	23	18	R	F	1	Psyc	1	10	-8.6125	0	4	2	3	1	0.2	0	0.363636	0.2	0.3	0.1	24.0139	61.8472	37.8333
14	75	143	curved	1	12	30	1.169	63	18	R	F	1	Psyc	1	10	-8.6125	0	4	2	3	1	0.2	0	0.363636	0.2	0.3	0.1	24.0139	61.8472	37.8333
14	76	36	curved	1	15	30	1.437	66	18	R	F	1	Psyc	1	10	-8.6125	0	4	2	3	1	0.2	0	0.363636	0.2	0.3	0.1	24.0139	61.8472	37.8333
14	77	136	curved	1	3	10	0.718	79	18	R	F	1	Psyc	1	10	-8.6125	0	4	2	3	1	0.2	0	0.363636	0.2	0.3	0.1	24.0139	61.8472	37.8333
14	78	85	curved	1	6	20	0.685	61	18	R	F	1	Psyc	1	10	-8.6125	0	4	2	3	1	0.2	0	0.363636	0.2	0.3	0.1	24.0139	61.8472	37.8333
14	79	84	curved	1	5	10	1.956	93	18	R	F	1	Psyc	1	10	-8.6125	0	4	2	3	1	0.2	0	0.363636	0.2	0.3	0.1	24.0139	61.8472	37.8333
14	80	16	curved	1	9	30	1.287	69	18	R	F	1	Psyc	1	10	-8.6125	0	4	2	3	1	0.2	0	0.363636	0.2	0.3	0.1	24.0139	61.8472	37.8333
14	81	58	angular	0	6	20	1.954	5	18	R	F	1	Psyc	1	10	-8.6125	0	4	2	3	1	0.2	0	0.363636	0.2	0.3	0.1	24.0139	61.8472	37.8333
14	82	64	curved	1	3	10	1.754	78	18	R	F	1	Psyc	1	10	-8.6125	0	4	2	3	1	0.2	0	0.363636	0.2	0.3	0.1	24.0139	61.8472	37.8333
14	83	112	angular	0	6	20	1.067	14	18	R	F	1	Psyc	1	10	-8.6125	0	4	2	3	1	0.2	0	0.363636	0.2	0.3	0.1	24.0139	61.8472	37.8333
14	84	91	angular	0	3	10	0.413	23	18	R	F	1	Psyc	1	10	-8.6125	0	4	2	3	1	0.2	0	0.363636	0.2	0.3	0.1	24.0139	61.8472	37.8333
14	85	103	curved	1	6	20	0.415	74	18	R	F	1	Psyc	1	10	-8.6125	0	4	2	3	1	0.2	0	0.363636	0.2	0.3	0.1	24.0139	61.8472	37.8333
14	86	106	curved	1	9	30	0.816	80	18	R	F	1	Psyc	1	10	-8.6125	0	4	2	3	1	0.2	0	0.363636	0.2	0.3	0.1	24.0139	61.8472	37.8333
14	87	93	angular	0	5	10	0.499	22	18	R	F	1	Psyc	1	10	-8.6125	0	4	2	3	1	0.2	0	0.363636	0.2	0.3	0.1	24.0139	61.8472	37.8333
14	88	65	curved	1	4	10	0.667	90	18	R	F	1	Psyc	1	10	-8.6125	0	4	2	3	1	0.2	0	0.363636	0.2	0.3	0.1	24.0139	61.8472	37.8333
14	89	30	curved	1	5	10	0.45	93	18	R	F	1	Psyc	1	10	-8.6125	0	4	2	3	1	0.2	0	0.363636	0.2	0.3	0.1	24.0139	61.8472	37.8333
14	90	53	curved	1	12	30	0.614	65	18	R	F	1	Psyc	1	10	-8.6125	0	4	2	3	1	0.2	0	0.363636	0.2	0.3	0.1	24.0139	61.8472	37.8333
14	91	76	angular	0	6	20	0.413	21	18	R	F	1	Psyc	1	10	-8.6125	0	4	2	3	1	0.2	0	0.363636	0.2	0.3	0.1	24.0139	61.8472	37.8333
14	92	67	curved	1	6	20	0.416	49	18	R	F	1	Psyc	1	10	-8.6125	0	4	2	3	1	0.2	0	0.363636	0.2	0.3	0.1	24.0139	61.8472	37.8333
14	93	4	angular	0	6	20	0.45	17	18	R	F	1	Psyc	1	10	-8.6125	0	4	2	3	1	0.2	0	0.363636	0.2	0.3	0.1	24.0139	61.8472	37.8333
14	94	20	angular	0	4	10	0.668	25	18	R	F	1	Psyc	1	10	-8.6125	0	4	2	3	1	0.2	0	0.363636	0.2	0.3	0.1	24.0139	61.8472	37.8333
14	95	5	angular	0	8	20	0.499	25	18	R	F	1	Psyc	1	10	-8.6125	0	4	2	3	1	0.2	0	0.363636	0.2	0.3	0.1	24.0139	61.8472	37.8333
14	96	135	angular	0	15	30	1.987	11	18	R	F	1	Psyc	1	10	-8.6125	0	4	2	3	1	0.2	0	0.363636	0.2	0.3	0.1	24.0139	61.8472	37.8333
14	97	113	angular	0	8	20	1.202	20	18	R	F	1	Psyc	1	10	-8.6125	0	4	2	3	1	0.2	0	0.363636	0.2	0.3	0.1	24.0139	61.8472	37.8333
14	98	59	angular	0	8	20	1.267	13	18	R	F	1	Psyc	1	10	-8.6125	0	4	2	3	1	0.2	0	0.363636	0.2	0.3	0.1	24.0139	61.8472	37.8333
14	99	45	angular	0	15	30	1.337	20	18	R	F	1	Psyc	1	10	-8.6125	0	4	2	3	1	0.2	0	0.363636	0.2	0.3	0.1	24.0139	61.8472	37.8333
14	100	108	curved	1	15	30	0.666	59	18	R	F	1	Psyc	1	10	-8.6125	0	4	2	3	1	0.2	0	0.363636	0.2	0.3	0.1	24.0139	61.8472	37.8333
14	101	137	curved	1	4	10	0.632	54	18	R	F	1	Psyc	1	10	-8.6125	0	4	2	3	1	0.2	0	0.363636	0.2	0.3	0.1	24.0139	61.8472	37.8333
14	102	27	angular	0	15	30	0.482	32	18	R	F	1	Psyc	1	10	-8.6125	0	4	2	3	1	0.2	0	0.363636	0.2	0.3	0.1	24.0139	61.8472	37.8333
14	103	139	curved	1	6	20	0.649	69	18	R	F	1	Psyc	1	10	-8.6125	0	4	2	3	1	0.2	0	0.363636	0.2	0.3	0.1	24.0139	61.8472	37.8333
14	104	110	angular	0	4	10	1.219	20	18	R	F	1	Psyc	1	10	-8.6125	0	4	2	3	1	0.2	0	0.363636	0.2	0.3	0.1	24.0139	61.8472	37.8333
14	105	1	angular	0	3	10	1.517	24	18	R	F	1	Psyc	1	10	-8.6125	0	4	2	3	1	0.2	0	0.363636	0.2	0.3	0.1	24.0139	61.8472	37.8333
14	106	40	angular	0	6	20	0.866	65	18	R	F	1	Psyc	1	10	-8.6125	0	4	2	3	1	0.2	0	0.363636	0.2	0.3	0.1	24.0139	61.8472	37.8333
14	107	2	angular	0	4	10	0.616	16	18	R	F	1	Psyc	1	10	-8.6125	0	4	2	3	1	0.2	0	0.363636	0.2	0.3	0.1	24.0139	61.8472	37.8333
14	108	134	angular	0	12	30	1.952	4	18	R	F	1	Psyc	1	10	-8.6125	0	4	2	3	1	0.2	0	0.363636	0.2	0.3	0.1	24.0139	61.8472	37.8333
14	109	83	curved	1	4	10	0.949	73	18	R	F	1	Psyc	1	10	-8.6125	0	4	2	3	1	0.2	0	0.363636	0.2	0.3	0.1	24.0139	61.8472	37.8333
14	110	24	angular	0	10	20	0.568	18	18	R	F	1	Psyc	1	10	-8.6125	0	4	2	3	1	0.2	0	0.363636	0.2	0.3	0.1	24.0139	61.8472	37.8333
14	111	51	curved	1	10	20	0.97	66	18	R	F	1	Psyc	1	10	-8.6125	0	4	2	3	1	0.2	0	0.363636	0.2	0.3	0.1	24.0139	61.8472	37.8333
14	112	69	curved	1	10	20	0.832	85	18	R	F	1	Psyc	1	10	-8.6125	0	4	2	3	1	0.2	0	0.363636	0.2	0.3	0.1	24.0139	61.8472	37.8333
14	113	81	angular	0	15	30	2.037	8	18	R	F	1	Psyc	1	10	-8.6125	0	4	2	3	1	0.2	0	0.363636	0.2	0.3	0.1	24.0139	61.8472	37.8333
14	114	17	curved	1	12	30	0.717	87	18	R	F	1	Psyc	1	10	-8.6125	0	4	2	3	1	0.2	0	0.363636	0.2	0.3	0.1	24.0139	61.8472	37.8333
14	115	52	curved	1	9	30	0.414	61	18	R	F	1	Psyc	1	10	-8.6125	0	4	2	3	1	0.2	0	0.363636	0.2	0.3	0.1	24.0139	61.8472	37.8333
14	116	62	angular	0	12	30	0.416	18	18	R	F	1	Psyc	1	10	-8.6125	0	4	2	3	1	0.2	0	0.363636	0.2	0.3	0.1	24.0139	61.8472	37.8333
14	117	116	angular	0	12	30	0.417	18	18	R	F	1	Psyc	1	10	-8.6125	0	4	2	3	1	0.2	0	0.363636	0.2	0.3	0.1	24.0139	61.8472	37.8333
14	118	140	curved	1	8	20	0.965	61	18	R	F	1	Psyc	1	10	-8.6125	0	4	2	3	1	0.2	0	0.363636	0.2	0.3	0.1	24.0139	61.8472	37.8333
14	119	56	angular	0	4	10	2.306	21	18	R	F	1	Psyc	1	10	-8.6125	0	4	2	3	1	0.2	0	0.363636	0.2	0.3	0.1	24.0139	61.8472	37.8333
14	120	82	curved	1	3	10	1.42	59	18	R	F	1	Psyc	1	10	-8.6125	0	4	2	3	1	0.2	0	0.363636	0.2	0.3	0.1	24.0139	61.8472	37.8333
14	121	26	angular	0	12	30	0.684	8	18	R	F	1	Psyc	1	10	-8.6125	0	4	2	3	1	0.2	0	0.363636	0.2	0.3	0.1	24.0139	61.8472	37.8333
14	122	119	curved	1	4	10	0.951	65	18	R	F	1	Psyc	1	10	-8.6125	0	4	2	3	1	0.2	0	0.363636	0.2	0.3	0.1	24.0139	61.8472	37.8333
14	123	35	curved	1	12	30	1.821	52	18	R	F	1	Psyc	1	10	-8.6125	0	4	2	3	1	0.2	0	0.363636	0.2	0.3	0.1	24.0139	61.8472	37.8333
14	124	32	curved	1	8	20	0.85	58	18	R	F	1	Psyc	1	10	-8.6125	0	4	2	3	1	0.2	0	0.363636	0.2	0.3	0.1	24.0139	61.8472	37.8333
14	125	23	angular	0	8	20	0.868	12	18	R	F	1	Psyc	1	10	-8.6125	0	4	2	3	1	0.2	0	0.363636	0.2	0.3	0.1	24.0139	61.8472	37.8333
14	126	141	curved	1	10	20	0.748	52	18	R	F	1	Psyc	1	10	-8.6125	0	4	2	3	1	0.2	0	0.363636	0.2	0.3	0.1	24.0139	61.8472	37.8333
14	127	127	angular	0	3	10	1.018	16	18	R	F	1	Psyc	1	10	-8.6125	0	4	2	3	1	0.2	0	0.363636	0.2	0.3	0.1	24.0139	61.8472	37.8333
[truncated: 21,041 more rows]

## Sheet: Legend
Culumn Name	Description
SubjectN	Subject Number
TrialNumber	Trial Number
stimID	Stimulus Identification Number (i.e. seed number)
form	stimulus type (i.e. angular, curved)
form_01	dummy coded variable form (i.e. 0 = angular, 1= curved)
nconcave	Number of concavities
nvertices	Number of vertices
RT	Response Time in entering rating
ratingShape	Rating Response (range 0 - 100) for the shape
age	participant's age
handedness	participant's preference for use of a hand
gender	participant's gender
gender_01	dummy coded variable gender (i.e. 0 = male, 1= female)
degree	participant's academic degree
degree_01	dummy coded variable degree (i.e. 0 = Science, 1= Psychology)
AQ(total scores)	participant's AQ (Summed) Score
AQ_C	AQ Score centered to the average of total scores (N= 160, M= 18.6, SD= 7.7)
SS	AQ subscale (summed score): social skill
AS	AQ subscale (summed score): attention switching
AD	AQ subscale (summed score): attention to detail
C	AQ subscale (summed score): communication
I	AQ subscale (summed score): imagination
AQ(means)	participant's AQ (average) Score
SS	AQ subscale (average score): social skill
AS	AQ subscale (average score): attention switching
AD	AQ subscale (average score): attention to detail
C	AQ subscale (average score): communication
I	AQ subscale (average score): imagination
Rating_Angles	participant average rating for curved shapes
Rating_Curves	participant average rating for angular shapes
RatingDiff	Average Rating Difference (curved - angular)
